# Supplementary material for: People at Risk of Influenza Pandemics: The Evolution of Perception and Behavior
Source: PLoS One. 2015 Dec 14;10(12):e0144868. doi: 10.1371/journal.pone.0144868 (PMC4682843; doi:10.1371/journal.pone.0144868)
Supplement: S4 File — (XLS) [file pone.0144868.s007.xls]

## Sheet: flu08
*Respnum	CITY	FQ1	FQ2	FQ3A	FQ3B	FQ3C	FQ3D	FQ4	FQ5A	FQ5B	FQ5C	FQ5D	FQ5E	FQ5F	FQ6A	FQ6B	FQ6C	FQ7A	FQ7B	FQ7C	FQ7D	FQ7E	FQ8	FQ9_1	FQ9_2	FQ9_3	FQ9_4	FQ9_5	FQ10	FQ11A_1	FQ11A_2	FQ11A_3	FQ11A_4	FQ11A_5	FQ11B_1	FQ11B_2	FQ11B_3	FQ11B_4	FQ11B_5	FQ12A_1	FQ12A_2	FQ12A_3	FQ12A_4	FQ12A_5	FQ12B_1	FQ12B_2	FQ12B_3	FQ12B_4	FQ12B_5
1	北京	3	0	0	0	0	0	5	2	2	1	1	1	1	1	1	2	5	4	4	4	5	2	8 没有意识000000000000000000000000000000000000000000000000000	0	0	0	0	4	3	0	0	0	0	3	0	0	0	0	1	0	0	0	0	1	0	0	0	0
2	北京	3	0	0	0	0	0	5	5	3	1	2	3	3	1	2	2	5	5	4	5	5	1	0	0	0	0	0	2	2	0	0	0	0	3	0	0	0	0	2	0	0	0	0	2	0	0	0	0
3	北京	3	0	0	0	0	0	4	2	2	2	3	3	3	1	1	2	4	5	4	5	2	2	4	8 注射过没用0000000000000000	0	0	0	3	3	5 机关的内部	0	0	0	1	0	0	0	0	3	5 凤凰台00	0	0	0	3	0	0	0	0
4	北京	1	3	0	0	0	0	5	1	1	5	5	1	1	1	1	2	5	5	5	5	5	1	0	0	0	0	0	4	1	0	0	0	0	5 单位集体000000	0	0	0	0	1	0	0	0	0	2	0	0	0	0
5	北京	3	0	0	0	0	0	2	2	4	3	3	4	2	2	1	2	4	3	2	2	1	2	5	2	0	0	0	3	4	0	0	0	0	2	0	0	0	0	1	0	0	0	0	2	1	0	0	0
8	北京	2	2	0	0	0	0	5	1	5	1	5	5	1	1	2	2	1	1	1	1	1	1	0	0	0	0	0	3	1	0	0	0	0	1	0	0	0	0	1	0	0	0	0	1	0	0	0	0
12	北京	3	0	0	0	0	0	5	6	5	5	5	5	5	1	2	2	5	5	1	5	5	2	2	0	0	0	0	3	4	3	0	0	0	3	4	0	0	0	3	0	0	0	0	5 医院000000000000	0	0	0	0
13	北京	3	0	0	0	0	0	4	2	2	1	1	3	3	1	1	2	5	5	4	5	4	1	0	0	0	0	0	1	1	0	0	0	0	5 当地医院000000	0	0	0	0	1	3	0	0	0	1	2	0	0	0
15	北京	1	4	1	1	1	2	5	3	3	1	1	1	1	1	2	2	5	5	4	5	3	2	8 没必要00000000000000000000000000000000000000000000000000000	0	0	0	0	4	3	0	0	0	0	3	0	0	0	0	1	0	0	0	0	1	0	0	0	0
18	北京	2	4	1	1	1	1	1	1	5	5	1	1	5	1	1	1	5	5	5	5	5	2	8 不重视00000000000000000000000000000000000000000000000000000	0	0	0	0	1	3	2	1	4	0	2	0	0	0	0	1	4	0	0	0	2	0	0	0	0
23	北京	1	3	0	0	0	0	5	1	3	1	1	4	1	1	1	2	5	5	5	5	5	2	2	0	0	0	0	3	1	3	0	0	0	1	0	0	0	0	6	0	0	0	0	1	0	0	0	0
24	北京	1	3	0	0	0	0	5	1	1	1	1	5	5	1	1	2	5	5	5	5	5	2	8 不相信00000000000000000000000000000000000000000000000000000	3	0	0	0	3	1	0	0	0	0	2	0	0	0	0	1	2	0	0	0	2	0	0	0	0
26	北京	3	0	0	0	0	0	5	1	1	1	3	4	4	1	1	2	5	4	1	5	2	2	8 怕疼0000000000000000000000000000000000000000000000000000000	0	0	0	0	4	3	5 家里000000	0	0	0	5 学校0000000000	3	0	0	0	5 学校0000000000000000	3	0	0	0	2	0	0	0	0
27	北京	1	4	2	1	1	1	4	1	1	5	5	5	5	1	1	2	5	5	4	5	4	2	8 发生流感的可能性小所以没打。0000000000000000000000000000000	0	0	0	0	3	4	3	2	0	0	5 防疫站。药店。	0	0	0	0	2	0	0	0	0	1	0	0	0	0
28	北京	2	4	1	1	2	1	3	3	3	1	2	4	4	1	1	2	4	4	5	5	5	2	2	0	0	0	0	3	1	0	0	0	0	2	0	0	0	0	1	0	0	0	0	1	0	0	0	0
29	北京	1	4	1	1	1	1	4	2	3	5	5	2	2	1	1	2	5	5	5	5	5	1	0	0	0	0	0	3	1	0	0	0	0	2	0	0	0	0	1	2	0	0	0	2	1	0	0	0
36	北京	3	0	0	0	0	0	5	1	2	6	2	2	2	1	1	2	5	4	5	5	5	1	0	0	0	0	0	4	4	1	0	0	0	1	0	0	0	0	1	0	0	0	0	5 医疗000000000000	0	0	0	0
40	北京	2	4	2	1	1	2	5	1	1	1	1	1	1	1	1	2	5	4	5	5	5	2	8 体质过敏000000000000000000000000000000000000000000000000000	2	0	0	0	4	1	2	0	0	0	2	0	0	0	0	1	0	0	0	0	2	0	0	0	0
41	北京	3	0	0	0	0	0	6	1	1	1	1	1	1	1	1	2	5	5	5	5	5	2	2	0	0	0	0	3	1	0	0	0	0	2	0	0	0	0	1	0	0	0	0	2	0	0	0	0
42	北京	3	0	0	0	0	0	2	3	3	1	3	3	2	1	1	2	4	4	5	5	5	2	8 没重视00000000000000000000000000000000000000000000000000000	0	0	0	0	4	5 媒体都有0000000000000	4	0	0	0	4	0	0	0	0	1	0	0	0	0	1	0	0	0	0
47	北京	2	4	1	2	1	1	5	2	2	1	2	2	3	1	1	2	5	5	5	5	5	2	2	0	0	0	0	1	3	0	0	0	0	1	0	0	0	0	2	0	0	0	0	3	0	0	0	0
52	北京	3	0	0	0	0	0	3	3	2	4	1	4	1	1	1	2	5	5	2	5	3	2	8 没有这种意识00000000000000000000000000000000000000000000000	0	0	0	0	3	1	0	0	0	0	1	0	0	0	0	1	0	0	0	0	1	0	0	0	0
54	北京	3	0	0	0	0	0	4	1	2	2	1	2	1	1	1	2	4	5	5	4	5	1	0	0	0	0	0	3	1	4	3	0	0	1	0	0	0	0	1	0	0	0	0	1	0	0	0	0
55	北京	2	4	2	2	1	2	5	2	2	1	3	4	3	1	1	2	5	5	5	5	5	2	2	0	0	0	0	3	1	0	0	0	0	1	0	0	0	0	1	0	0	0	0	1	0	0	0	0
57	北京	1	4	2	2	1	2	1	3	3	1	3	3	3	1	1	2	4	5	5	5	5	2	8 没有去00000000000000000000000000000000000000000000000000000	0	0	0	0	3	1	0	0	0	0	1	0	0	0	0	1	0	0	0	0	1	0	0	0	0
58	北京	2	3	0	0	0	0	5	1	3	1	1	1	1	1	1	2	5	5	5	5	3	2	8 没有通知000000000000000000000000000000000000000000000000000	0	0	0	0	1	1	2	3	0	0	2	0	0	0	0	1	0	0	0	0	1	0	0	0	0
62	北京	3	0	0	0	0	0	4	3	3	1	1	4	3	1	1	2	5	5	3	5	5	2	4	0	0	0	0	3	1	3	0	0	0	1	3	0	0	0	1	3	0	0	0	1	0	0	0	0
65	北京	1	3	0	0	0	0	5	1	1	1	2	2	1	1	1	2	4	5	4	5	4	2	8 交通不方便0000000000000000000000000000000000000000000000000	0	0	0	0	1	1	0	0	0	0	1	0	0	0	0	1	0	0	0	0	1	0	0	0	0
66	北京	3	0	0	0	0	0	5	2	2	1	1	3	2	1	1	2	4	4	5	4	5	2	3	0	0	0	0	1	3	0	0	0	0	4	0	0	0	0	1	0	0	0	0	1	0	0	0	0
67	北京	1	4	1	1	1	1	4	3	4	5	5	1	1	1	1	2	5	5	5	5	5	2	2	0	0	0	0	4	1	0	0	0	0	1	0	0	0	0	1	0	0	0	0	1	0	0	0	0
68	北京	3	0	0	0	0	0	4	2	1	1	1	1	1	1	1	2	5	5	5	5	5	2	8 人自身有免疫力没什么必要00000000000000000000000000000000000	0	0	0	0	3	1	5 网上000000	0	0	0	2	0	0	0	0	1	0	0	0	0	1	0	0	0	0
69	北京	3	0	0	0	0	0	5	1	1	1	4	4	4	1	1	2	5	5	5	5	5	1	0	0	0	0	0	1	5 报纸00000000000000000	3	4	0	0	1	3	0	0	0	1	5 新闻联播	0	0	0	1	0	0	0	0
70	北京	2	1	0	0	0	0	4	1	4	3	3	2	2	1	1	2	5	5	2	4	3	2	2	0	0	0	0	4	1	0	0	0	0	2	0	0	0	0	1	0	0	0	0	2	0	0	0	0
73	北京	3	0	0	0	0	0	5	1	1	1	1	1	1	1	1	2	5	5	5	5	5	2	6	0	0	0	0	3	5 不知道000000000000000	0	0	0	0	2	0	0	0	0	1	0	0	0	0	2	1	3	4	0
74	北京	3	0	0	0	0	0	5	1	1	1	1	1	1	1	1	2	5	5	5	5	5	1	0	0	0	0	0	4	5 本人00000000000000000	0	0	0	0	2	0	0	0	0	2	0	0	0	0	2	0	0	0	0
77	北京	2	3	0	0	0	0	4	1	3	1	3	5	4	1	1	2	3	5	5	5	5	2	2	0	0	0	0	1	1	0	0	0	0	2	0	0	0	0	1	0	0	0	0	1	0	0	0	0
78	北京	2	4	2	2	1	1	1	1	1	1	1	1	5	1	1	1	5	5	5	5	5	2	8 不需要00000000000000000000000000000000000000000000000000000	0	0	0	0	4	4	3	0	0	0	2	0	0	0	0	1	0	0	0	0	1	0	0	0	0
79	北京	1	3	0	0	0	0	2	3	3	2	3	2	4	1	1	2	5	5	4	5	5	2	2	0	0	0	0	3	3	5 报纸000000	0	0	0	1	0	0	0	0	1	0	0	0	0	1	2	0	0	0
80	北京	3	0	0	0	0	0	5	1	1	5	5	5	5	2	2	2	5	5	5	5	1	1	0	0	0	0	0	1	4	0	0	0	0	5 医院0000000000	0	0	0	0	4	0	0	0	0	1	0	0	0	0
81	北京	2	4	1	2	1	1	5	1	2	2	5	5	4	1	2	2	5	4	2	5	3	2	8 政府没有宣传00000000000000000000000000000000000000000000000	0	0	0	0	3	1	0	0	0	0	1	2	3	0	0	1	0	0	0	0	1	2	0	0	0
84	北京	3	0	0	0	0	0	5	1	1	1	1	3	3	1	1	2	5	5	2	5	5	1	0	0	0	0	0	1	1	0	0	0	0	1	0	0	0	0	1	0	0	0	0	1	0	0	0	0
86	北京	2	4	1	2	1	1	4	1	1	1	1	1	1	1	1	2	5	5	5	5	5	2	2	0	0	0	0	3	1	2	3	0	0	1	0	0	0	0	1	0	0	0	0	1	0	0	0	0
87	北京	3	0	0	0	0	0	4	2	2	2	2	4	2	1	2	2	5	5	5	5	5	2	2	0	0	0	0	4	1	2	3	4	0	5 单位0000000000	1	0	0	0	1	0	0	0	0	1	0	0	0	0
89	北京	3	0	0	0	0	0	3	2	2	1	2	4	4	2	1	2	3	5	1	5	5	2	8 不知道00000000000000000000000000000000000000000000000000000	0	0	0	0	4	4	1	0	0	0	4	0	0	0	0	2	0	0	0	0	2	0	0	0	0
90	北京	2	3	0	0	0	0	5	1	2	1	1	1	1	1	2	2	4	5	5	5	5	1	0	0	0	0	0	3	5 单位00000000000000000	0	0	0	0	5 单位0000000000	0	0	0	0	2	0	0	0	0	1	0	0	0	0
92	北京	2	4	1	1	1	1	2	4	3	3	3	2	3	1	1	2	5	5	5	4	5	1	0	0	0	0	0	1	1	3	0	0	0	5 医院。社区宣传	0	0	0	0	1	3	0	0	0	5 医院。疾控中心00	0	0	0	0
94	北京	1	4	2	2	1	1	5	2	2	1	2	3	3	1	1	2	5	5	4	5	2	2	8 不知道00000000000000000000000000000000000000000000000000000	0	0	0	0	3	2	1	0	0	0	5 单位0000000000	0	0	0	0	1	0	0	0	0	5 医院000000000000	0	0	0	0
98	北京	1	4	1	1	1	1	4	1	1	1	1	1	1	1	2	2	5	5	5	5	5	1	0	0	0	0	0	1	1	0	0	0	0	2	0	0	0	0	2	0	0	0	0	2	0	0	0	0
101	北京	3	0	0	0	0	0	5	1	1	1	2	2	2	1	1	2	5	5	5	5	5	2	2	0	0	0	0	3	1	0	0	0	0	5 医院0000000000	0	0	0	0	1	0	0	0	0	5 医院000000000000	0	0	0	0
102	北京	3	0	0	0	0	0	5	1	1	1	1	1	2	1	1	2	5	5	5	5	5	2	2	0	0	0	0	1	4	0	0	0	0	1	0	0	0	0	1	0	0	0	0	1	0	0	0	0
103	北京	2	1	0	0	0	0	5	3	3	5	1	2	5	1	1	2	5	5	4	5	5	2	3	2	0	0	0	3	1	0	0	0	0	1	0	0	0	0	1	0	0	0	0	1	0	0	0	0
104	北京	3	0	0	0	0	0	4	1	1	1	1	1	1	1	2	2	5	5	5	5	5	2	2	0	0	0	0	3	1	0	0	0	0	1	0	0	0	0	1	0	0	0	0	1	0	0	0	0
106	北京	1	3	0	0	0	0	4	1	2	1	1	1	1	1	1	2	5	5	5	5	5	1	0	0	0	0	0	1	2	0	0	0	0	2	0	0	0	0	1	0	0	0	0	1	0	0	0	0
107	北京	1	3	0	0	0	0	2	1	2	3	4	4	3	2	2	2	3	5	3	5	2	2	2	0	0	0	0	4	1	2	0	0	0	1	2	0	0	0	1	2	0	0	0	1	2	0	0	0
108	北京	2	3	0	0	0	0	5	1	3	2	5	3	5	1	1	2	5	5	5	5	2	2	8 没有在家000000000000000000000000000000000000000000000000000	0	0	0	0	4	1	2	0	0	0	1	2	0	0	0	2	0	0	0	0	2	0	0	0	0
110	北京	1	4	2	1	1	1	1	2	2	2	2	3	4	1	1	2	5	5	2	4	2	2	8 学校没有000000000000000000000000000000000000000000000000000	0	0	0	0	3	1	0	0	0	0	4	0	0	0	0	1	0	0	0	0	1	2	0	0	0
112	北京	2	4	2	1	1	1	4	1	1	1	1	4	1	1	1	1	3	5	5	5	5	2	2	0	0	0	0	2	1	2	3	0	0	2	0	0	0	0	1	2	3	0	0	1	0	0	0	0
114	北京	2	4	2	1	2	2	4	2	2	4	2	2	2	1	1	2	5	5	5	5	5	2	2	0	0	0	0	3	1	0	0	0	0	2	0	0	0	0	1	0	0	0	0	2	0	0	0	0
115	北京	1	3	0	0	0	0	5	1	2	1	1	5	3	1	1	2	5	5	1	5	5	2	8 该得的病肯定会得。不该得的病就不会得00000000000000000000000	0	0	0	0	3	1	3	0	0	0	2	4	0	0	0	1	0	0	0	0	2	0	0	0	0
116	北京	2	1	0	0	0	0	3	6	4	3	3	3	2	1	1	2	5	2	2	5	3	1	0	0	0	0	0	3	4	1	0	0	0	5 医院0000000000	0	0	0	0	1	0	0	0	0	1	0	0	0	0
117	北京	3	0	0	0	0	0	4	3	1	2	1	1	1	1	1	2	5	5	3	5	3	1	0	0	0	0	0	3	3	0	0	0	0	4	0	0	0	0	1	0	0	0	0	5 医院 药店000000	0	0	0	0
118	北京	1	4	2	2	1	1	4	2	2	1	3	4	4	1	1	2	3	5	5	5	5	2	3	8 不知道是否能起到作用000000	0	0	0	3	1	0	0	0	0	1	0	0	0	0	1	0	0	0	0	1	0	0	0	0
123	北京	3	0	0	0	0	0	5	3	2	1	3	1	1	1	1	2	5	5	5	5	4	2	8 没时间00000000000000000000000000000000000000000000000000000	0	0	0	0	2	1	2	0	0	0	2	0	0	0	0	2	1	0	0	0	1	2	0	0	0
124	北京	2	4	2	1	1	1	4	1	1	1	1	1	5	1	1	2	3	5	1	5	5	2	2	0	0	0	0	3	5 单位00000000000000000	0	0	0	0	1	2	0	0	0	1	0	0	0	0	1	0	0	0	0
125	北京	3	0	0	0	0	0	3	1	1	3	1	3	1	2	1	2	5	5	5	2	5	2	2	0	0	0	0	3	1	0	0	0	0	1	0	0	0	0	4	0	0	0	0	1	0	0	0	0
127	北京	2	3	0	0	0	0	2	2	2	2	3	4	3	1	1	2	3	5	5	5	1	2	2	0	0	0	0	3	1	3	0	0	0	1	3	0	0	0	1	3	0	0	0	1	2	0	0	0
128	北京	1	4	1	1	1	1	5	2	2	1	1	1	1	1	1	2	4	5	5	5	5	2	2	0	0	0	0	4	1	2	0	0	0	1	2	0	0	0	1	2	0	0	0	1	2	0	0	0
134	北京	2	5	0	0	0	0	3	2	2	2	3	3	2	1	1	2	4	5	4	5	5	2	2	0	0	0	0	4	1	2	3	4	0	3	0	0	0	0	1	0	0	0	0	2	0	0	0	0
142	北京	3	0	0	0	0	0	5	1	1	1	1	1	1	1	1	2	4	4	5	4	5	1	0	0	0	0	0	2	1	3	0	0	0	1	3	5 电视。	0	0	1	3	5 医院。	0	0	5 医院。0000000000	1	0	0	0
145	北京	1	4	1	2	1	1	3	2	2	1	1	1	2	1	1	2	5	5	5	5	4	1	0	0	0	0	0	1	1	2	3	4	0	2	3	1	0	0	1	2	3	0	0	1	2	0	0	0
146	北京	2	4	2	1	1	1	3	2	4	4	1	3	3	1	1	2	4	5	5	5	4	2	2	8 在外地00000000000000000000	0	0	0	2	1	3	0	0	0	4	3	0	0	0	2	0	0	0	0	2	0	0	0	0
147	北京	1	3	0	0	0	0	4	2	2	3	2	4	4	1	1	2	4	5	5	5	5	2	2	0	0	0	0	1	4	0	0	0	0	1	0	0	0	0	1	0	0	0	0	1	0	0	0	0
148	北京	2	4	2	1	1	1	4	2	2	1	1	3	3	1	1	2	5	5	5	5	5	2	2	0	0	0	0	1	4	0	0	0	0	4	0	0	0	0	2	0	0	0	0	2	0	0	0	0
149	北京	3	0	0	0	0	0	5	1	6	1	3	6	1	2	2	2	5	5	5	5	5	2	2	8 不知道00000000000000000000	0	0	0	3	1	2	0	0	0	1	2	0	0	0	1	2	0	0	0	1	2	0	0	0
152	北京	2	4	2	1	1	1	4	3	3	5	2	2	1	1	2	2	4	5	5	5	4	2	4	0	0	0	0	2	1	2	0	0	0	1	0	0	0	0	1	0	0	0	0	1	0	0	0	0
155	北京	1	4	2	1	1	1	5	1	1	1	1	1	1	1	1	2	5	5	5	5	5	2	2	0	0	0	0	3	1	0	0	0	0	1	2	3	4	0	1	2	0	0	0	1	2	3	0	0
158	北京	3	0	0	0	0	0	4	2	2	1	1	3	2	1	1	2	5	5	5	5	5	2	2	0	0	0	0	3	3	4	0	0	0	5 学校0000000000	0	0	0	0	2	0	0	0	0	2	0	0	0	0
159	北京	3	0	0	0	0	0	5	1	1	1	5	1	1	1	1	2	5	5	5	5	5	2	2	0	0	0	0	1	3	0	0	0	0	5	0	0	0	0	1	0	0	0	0	1	0	0	0	0
160	北京	1	1	0	0	0	0	5	1	2	1	1	1	1	1	2	2	5	5	5	5	5	2	8 不知道这方面情况0000000000000000000000000000000000000000000	0	0	0	0	4	1	0	0	0	0	1	3	0	0	0	1	0	0	0	0	1	0	0	0	0
161	北京	1	4	1	2	1	1	4	3	3	1	1	5	5	1	1	2	5	5	5	5	5	2	8	0	0	0	0	3	3	0	0	0	0	1	0	0	0	0	5 国外0000000000000000	0	0	0	0	1	5	0	0	0
162	北京	1	4	2	1	1	1	4	3	4	5	5	3	3	1	1	2	5	5	4	5	4	2	2	0	0	0	0	3	2	0	0	0	0	1	0	0	0	0	2	0	0	0	0	2	0	0	0	0
163	北京	3	0	0	0	0	0	5	2	3	1	4	5	5	1	1	2	5	5	3	5	5	2	6	0	0	0	0	4	4	0	0	0	0	5 不知道00000000	0	0	0	0	6	0	0	0	0	5 村委000000000000	0	0	0	0
168	北京	3	0	0	0	0	0	5	3	3	3	6	3	4	1	1	2	3	5	4	4	3	2	8 不知道00000000000000000000000000000000000000000000000000000	0	0	0	0	3	1	0	0	0	0	1	0	0	0	0	1	0	0	0	0	1	0	0	0	0
170	北京	3	0	0	0	0	0	5	1	3	1	3	2	1	1	1	2	3	4	3	5	3	2	2	0	0	0	0	4	1	0	0	0	0	1	0	0	0	0	1	0	0	0	0	2	0	0	0	0
171	北京	3	0	0	0	0	0	6	2	1	1	4	3	5	2	2	2	1	3	5	5	5	2	6	0	0	0	0	3	4	0	0	0	0	4	0	0	0	0	3	0	0	0	0	3	0	0	0	0
172	北京	3	0	0	0	0	0	5	2	2	4	1	1	1	1	1	2	5	5	5	5	5	2	8 没有人通知0000000000000000000000000000000000000000000000000	0	0	0	0	2	1	0	0	0	0	5 学校医院000000	0	0	0	0	1	4	0	0	0	2	0	0	0	0
173	北京	3	0	0	0	0	0	5	1	1	1	1	1	1	1	1	2	5	5	5	5	5	2	2	0	0	0	0	3	1	2	0	0	0	1	0	0	0	0	1	2	0	0	0	1	0	0	0	0
176	北京	3	0	0	0	0	0	2	1	1	1	1	2	1	1	1	2	5	5	5	5	4	2	2	0	0	0	0	4	3	0	0	0	0	2	0	0	0	0	4	5 医院0000	0	0	0	2	0	0	0	0
177	北京	1	3	0	0	0	0	3	1	1	5	1	5	6	1	1	2	5	5	5	5	5	2	4	7	0	0	0	4	1	2	0	0	0	5 医院0000000000	0	0	0	0	1	2	0	0	0	5 医院000000000000	0	0	0	0
180	北京	1	3	0	0	0	0	4	1	1	1	1	1	1	1	1	2	5	5	1	5	5	2	2	0	0	0	0	4	2	1	0	0	0	2	1	0	0	0	1	2	0	0	0	1	2	0	0	0
182	北京	3	0	0	0	0	0	4	1	1	1	1	1	1	1	1	2	5	5	5	5	5	2	2	0	0	0	0	2	2	1	0	0	0	1	2	3	0	0	1	0	0	0	0	5 医院。0000000000	2	0	0	0
184	北京	3	0	0	0	0	0	5	1	1	1	1	1	1	1	1	2	5	3	5	5	5	2	8 没有得感冒0000000000000000000000000000000000000000000000000	0	0	0	0	3	3	0	0	0	0	3	0	0	0	0	1	0	0	0	0	1	0	0	0	0
185	北京	3	0	0	0	0	0	5	2	3	5	1	5	5	1	1	2	4	4	5	5	5	1	0	0	0	0	0	1	4	0	0	0	0	4	0	0	0	0	2	0	0	0	0	2	0	0	0	0
187	北京	3	0	0	0	0	0	5	1	1	1	1	2	2	1	1	2	5	5	5	5	4	1	0	0	0	0	0	3	1	2	3	4	0	1	0	0	0	0	1	3	0	0	0	1	3	0	0	0
188	北京	3	0	0	0	0	0	4	2	2	1	1	2	2	2	1	2	5	5	4	5	5	2	8 没有时间000000000000000000000000000000000000000000000000000	2	0	0	0	3	3	0	0	0	0	3	0	0	0	0	1	0	0	0	0	1	0	0	0	0
190	北京	3	0	0	0	0	0	5	1	1	2	4	4	1	1	1	2	1	5	5	5	5	2	8 不知道。000000000000000000000000000000000000000000000000000	0	0	0	0	1	4	1	0	0	0	1	0	0	0	0	1	0	0	0	0	1	0	0	0	0
192	北京	2	4	1	1	1	1	2	3	2	1	1	1	1	1	1	2	5	5	5	5	2	2	5	0	0	0	0	3	1	0	0	0	0	1	0	0	0	0	1	2	0	0	0	1	0	0	0	0
193	北京	1	4	2	1	1	1	4	2	2	1	1	5	5	1	2	2	5	5	5	5	5	2	8	0	0	0	0	3	2	0	0	0	0	3	0	0	0	0	3	0	0	0	0	2	0	0	0	0
194	北京	3	0	0	0	0	0	1	4	5	2	5	2	5	1	2	2	5	5	5	5	4	2	2	4	0	0	0	4	4	0	0	0	0	5 单位0000000000	0	0	0	0	3	0	0	0	0	2	0	0	0	0
197	北京	3	0	0	0	0	0	5	1	3	1	1	5	4	1	1	1	5	1	1	2	5	1	0	0	0	0	0	1	2	1	0	0	0	2	0	0	0	0	2	0	0	0	0	2	0	0	0	0
198	北京	3	0	0	0	0	0	5	1	1	1	1	1	1	2	1	2	3	3	3	3	3	2	6	0	0	0	0	1	2	0	0	0	0	2	0	0	0	0	2	0	0	0	0	2	0	0	0	0
200	北京	3	0	0	0	0	0	4	1	1	1	1	2	3	1	2	2	5	5	5	4	3	2	8 自己会很小心。不会得这种病000000000000000000000000000000000	0	0	0	0	4	3	4	0	0	0	5 没听说过000000	0	0	0	0	1	3	0	0	0	3	0	0	0	0
202	北京	2	4	1	1	1	1	2	2	3	5	2	5	4	1	2	2	5	5	4	5	3	2	3	2	0	0	0	3	1	2	0	0	0	2	1	0	0	0	1	2	0	0	0	1	0	0	0	0
205	北京	3	0	0	0	0	0	5	1	1	1	1	1	1	1	1	2	5	5	3	5	5	1	0	0	0	0	0	3	3	4	0	0	0	3	4	0	0	0	2	1	0	0	0	1	2	0	0	0
206	北京	1	4	2	2	1	1	4	3	3	5	1	3	1	1	1	2	5	5	5	5	5	1	0	0	0	0	0	3	2	1	0	0	0	1	2	0	0	0	1	2	0	0	0	1	2	0	0	0
208	北京	3	0	0	0	0	0	4	1	2	2	3	4	3	1	1	2	5	5	5	5	5	2	2	0	0	0	0	3	1	2	3	4	0	2	0	0	0	0	1	0	0	0	0	1	0	0	0	0
213	北京	2	3	0	0	0	0	4	3	3	2	2	4	3	1	2	2	3	5	5	4	5	2	8 不适合00000000000000000000000000000000000000000000000000000	0	0	0	0	3	3	1	0	0	0	2	0	0	0	0	1	0	0	0	0	2	0	0	0	0
214	北京	1	5	0	0	0	0	3	1	1	3	3	3	3	1	1	2	4	4	1	5	5	2	8 没注意这件事00000000000000000000000000000000000000000000000	0	0	0	0	3	3	0	0	0	0	4	0	0	0	0	4	0	0	0	0	4	0	0	0	0
217	北京	3	0	0	0	0	0	1	1	2	1	1	1	1	1	1	2	5	5	5	5	5	2	8 没时间00000000000000000000000000000000000000000000000000000	0	0	0	0	3	5 新闻00000000000000000	0	0	0	0	2	0	0	0	0	1	0	0	0	0	2	0	0	0	0
218	北京	3	0	0	0	0	0	5	3	3	3	5	3	4	1	1	2	5	5	4	5	4	2	8 听宣传说打疫苗在某个年龄段之间.用户不符合这个年龄段就没去打	0	0	0	0	4	1	2	3	0	0	3	2	1	0	0	1	2	0	0	0	2	1	0	0	0
219	北京	1	4	2	1	1	1	4	2	3	1	1	4	2	1	1	2	5	5	5	5	5	2	4	0	0	0	0	2	1	2	0	0	0	3	0	0	0	0	1	0	0	0	0	2	0	0	0	0
220	北京	3	0	0	0	0	0	6	5	3	1	1	3	1	1	1	2	5	5	2	5	5	2	8 害怕0000000000000000000000000000000000000000000000000000000	0	0	0	0	1	3	2	1	0	0	2	0	0	0	0	2	0	0	0	0	2	0	0	0	0
221	北京	3	0	0	0	0	0	5	2	2	5	3	4	3	1	2	2	3	4	5	5	3	2	2	0	0	0	0	4	3	0	0	0	0	3	0	0	0	0	1	2	0	0	0	1	2	0	0	0
222	北京	2	5	0	0	0	0	5	2	2	1	2	1	3	1	1	2	5	5	5	3	2	2	8 没考虑00000000000000000000000000000000000000000000000000000	0	0	0	0	3	1	0	0	0	0	2	0	0	0	0	1	0	0	0	0	1	0	0	0	0
225	北京	3	0	0	0	0	0	5	1	3	5	3	1	1	1	2	2	1	5	1	5	5	2	2	0	0	0	0	4	1	0	0	0	0	1	0	0	0	0	1	0	0	0	0	1	0	0	0	0
226	北京	2	3	0	0	0	0	5	1	2	1	1	2	2	1	1	2	4	5	5	5	5	2	8 身体对疫苗有过敏史00000000000000000000000000000000000000000	0	0	0	0	2	3	1	2	0	0	4	0	0	0	0	4	0	0	0	0	5	0	0	0	0
229	北京	2	2	0	0	0	0	3	1	1	5	5	1	5	2	2	2	5	1	1	1	1	1	0	0	0	0	0	1	3	0	0	0	0	1	0	0	0	0	1	0	0	0	0	1	0	0	0	0
230	北京	1	4	2	1	1	1	4	2	1	1	1	4	1	1	1	2	5	5	5	5	6	1	0	0	0	0	0	3	3	0	0	0	0	1	2	0	0	0	5 海外媒体000000000000	0	0	0	0	2	0	0	0	0
231	北京	1	3	0	0	0	0	4	2	2	1	3	4	2	1	1	2	5	5	5	4	3	2	8	2	0	0	0	1	5	2	0	0	0	5	4	0	0	0	1	5 医院0000	0	0	0	5 医院000000000000	1	0	0	0
232	北京	2	3	0	0	0	0	5	1	1	1	3	2	1	1	1	2	5	5	4	5	5	2	8 没关系00000000000000000000000000000000000000000000000000000	0	0	0	0	3	1	2	0	0	0	1	2	0	0	0	1	2	0	0	0	1	2	0	0	0
234	北京	2	6 不清楚是那一项	0	0	0	0	2	1	1	3	5	1	1	1	1	2	5	5	5	5	5	1	0	0	0	0	0	4	4	0	0	0	0	1	0	0	0	0	4	0	0	0	0	1	0	0	0	0
236	北京	1	1	0	0	0	0	4	2	4	1	3	3	1	1	1	2	5	5	5	5	5	2	3	4	0	0	0	3	1	0	0	0	0	1	0	0	0	0	1	0	0	0	0	1	0	0	0	0
237	北京	2	6 不知道00000000	0	0	0	0	5	2	1	4	3	3	1	1	2	2	5	5	5	5	5	2	2	0	0	0	0	2	5 报纸电视0000000000000	0	0	0	0	5 报纸电看000000	0	0	0	0	5 中央电视000000000000	0	0	0	0	5 不知道0000000000	0	0	0	0
240	北京	3	0	0	0	0	0	5	1	1	1	5	5	5	1	1	2	5	5	2	5	3	1	0	0	0	0	0	4	2	0	0	0	0	1	0	0	0	0	2	0	0	0	0	2	0	0	0	0
243	北京	3	0	0	0	0	0	4	2	2	3	1	1	3	1	1	2	5	5	5	5	5	2	2	0	0	0	0	3	1	0	0	0	0	1	0	0	0	0	1	0	0	0	0	1	0	0	0	0
248	北京	3	0	0	0	0	0	5	1	1	1	6	1	5	1	1	2	5	5	5	5	3	2	2	0	0	0	0	4	1	0	0	0	0	1	0	0	0	0	1	0	0	0	0	5 防疫站。00000000	0	0	0	0
250	北京	2	3	0	0	0	0	4	1	1	1	2	1	3	1	1	2	5	5	5	5	5	2	6	0	0	0	0	2	1	2	0	0	0	1	2	0	0	0	1	2	0	0	0	1	2	0	0	0
251	北京	2	3	0	0	0	0	5	3	3	5	3	5	3	1	1	2	5	5	5	5	5	1	0	0	0	0	0	1	3	4	0	0	0	1	5 学校00000	0	0	0	1	4	0	0	0	1	0	0	0	0
252	北京	3	0	0	0	0	0	5	2	2	2	4	5	5	1	1	2	4	4	2	4	4	2	8 没感冒00000000000000000000000000000000000000000000000000000	0	0	0	0	3	1	2	3	4	0	1	0	0	0	0	1	2	0	0	0	2	0	0	0	0
253	北京	1	4	2	1	1	1	3	2	3	2	1	5	3	1	1	2	5	4	5	5	5	2	2	0	0	0	0	3	1	0	0	0	0	1	0	0	0	0	1	0	0	0	0	1	0	0	0	0
255	北京	2	3	0	0	0	0	3	2	2	1	1	3	2	1	1	2	5	5	5	5	5	1	0	0	0	0	0	3	1	2	0	0	0	2	1	0	0	0	1	2	0	0	0	2	0	0	0	0
258	北京	3	0	0	0	0	0	2	1	1	2	3	1	3	1	1	2	4	5	4	5	4	2	8 一直吃着保健药品0000000000000000000000000000000000000000000	0	0	0	0	3	4	2	0	0	0	2	0	0	0	0	1	0	0	0	0	1	0	0	0	0
261	北京	2	3	0	0	0	0	2	2	2	5	3	4	5	1	1	1	4	5	4	5	5	1	0	0	0	0	0	3	1	0	0	0	0	1	0	0	0	0	1	0	0	0	0	1	0	0	0	0
262	北京	3	0	0	0	0	0	3	1	5	1	5	5	1	1	1	2	5	5	5	5	5	1	0	0	0	0	0	1	1	0	0	0	0	2	0	0	0	0	1	0	0	0	0	2	0	0	0	0
263	北京	1	6 都可能00000000	0	0	0	0	4	4	5	2	1	1	1	1	1	2	5	5	5	5	5	1	0	0	0	0	0	3	1	2	0	0	0	1	2	0	0	0	1	2	0	0	0	1	0	0	0	0
264	北京	3	0	0	0	0	0	5	2	3	1	1	1	2	1	1	2	4	4	5	3	4	2	2	0	0	0	0	3	1	0	0	0	0	1	0	0	0	0	1	0	0	0	0	1	0	0	0	0
265	北京	3	0	0	0	0	0	5	1	2	1	1	1	3	1	2	2	1	5	5	5	1	2	2	0	0	0	0	4	1	0	0	0	0	1	0	0	0	0	3	0	0	0	0	3	0	0	0	0
266	北京	3	0	0	0	0	0	4	1	3	3	3	1	1	1	1	2	4	4	4	5	5	2	8 自己认为感染的可能性小0000000000000000000000000000000000000	0	0	0	0	3	1	3	0	0	0	1	0	0	0	0	1	0	0	0	0	2	0	0	0	0
267	北京	3	0	0	0	0	0	5	2	3	2	1	4	4	1	1	2	4	5	5	4	3	1	0	0	0	0	0	3	1	3	0	0	0	5 单位0000000000	0	0	0	0	3	1	0	0	0	2	0	0	0	0
269	北京	2	6 不清楚00000000	0	0	0	0	5	1	1	1	1	1	1	1	1	2	5	4	5	5	5	2	2	0	0	0	0	1	4	0	0	0	0	2	0	0	0	0	2	0	0	0	0	1	0	0	0	0
271	北京	3	0	0	0	0	0	2	1	3	3	1	1	3	1	1	2	5	5	5	5	5	2	8 个人注意一下就可以没有必要000000000000000000000000000000000	0	0	0	0	1	1	0	0	0	0	1	5 医院00000	0	0	0	1	0	0	0	0	1	0	0	0	0
275	北京	3	0	0	0	0	0	3	5	3	3	3	1	1	1	1	2	5	5	5	3	3	2	6	0	0	0	0	3	1	2	3	4	0	2	0	0	0	0	1	2	3	4	0	1	0	0	0	0
276	北京	3	0	0	0	0	0	5	1	1	5	4	5	5	1	1	2	5	5	5	5	5	2	2	0	0	0	0	4	3	0	0	0	0	1	0	0	0	0	1	0	0	0	0	1	2	0	0	0
277	北京	1	1	0	0	0	0	5	1	1	5	1	2	1	1	1	2	5	5	5	5	5	1	0	0	0	0	0	1	4	0	0	0	0	5 社区0000000000	0	0	0	0	1	0	0	0	0	1	0	0	0	0
278	北京	3	0	0	0	0	0	5	2	2	4	3	1	2	1	1	2	4	3	3	4	3	2	2	0	0	0	0	3	1	2	0	0	0	1	2	0	0	0	1	2	0	0	0	1	2	0	0	0
280	北京	3	0	0	0	0	0	4	3	4	1	1	2	1	1	1	2	4	5	5	5	4	2	2	0	0	0	0	3	1	2	0	0	0	4	0	0	0	0	1	0	0	0	0	1	2	0	0	0
282	北京	2	4	2	1	1	2	4	3	3	1	1	1	1	1	2	2	2	5	5	5	5	2	2	0	0	0	0	3	3	0	0	0	0	2	0	0	0	0	1	0	0	0	0	1	0	0	0	0
283	北京	2	2	0	0	0	0	4	2	3	2	4	1	1	2	2	2	2	1	1	4	2	2	2	0	0	0	0	4	4	0	0	0	0	1	0	0	0	0	2	0	0	0	0	2	0	0	0	0
284	北京	1	3	0	0	0	0	4	2	2	4	3	1	1	1	1	2	4	5	5	5	5	2	8 没意识00000000000000000000000000000000000000000000000000000	0	0	0	0	3	4	0	0	0	0	4	0	0	0	0	1	2	0	0	0	1	0	0	0	0
285	北京	3	0	0	0	0	0	5	1	1	1	1	1	1	1	1	2	5	5	5	5	5	2	2	0	0	0	0	3	1	2	0	0	0	1	0	0	0	0	1	0	0	0	0	1	0	0	0	0
287	北京	3	0	0	0	0	0	5	2	1	1	1	1	1	1	1	2	3	5	5	5	5	2	2	8 没时间00000000000000000000	0	0	0	3	1	0	0	0	0	1	0	0	0	0	1	0	0	0	0	1	0	0	0	0
291	北京	2	1	0	0	0	0	5	1	1	1	1	5	5	1	1	2	5	5	5	5	6	2	2	0	0	0	0	4	4	0	0	0	0	1	0	0	0	0	1	0	0	0	0	1	0	0	0	0
293	北京	1	4	1	2	2	1	5	3	3	5	4	2	1	1	1	2	5	5	5	5	5	1	0	0	0	0	0	3	1	3	0	0	0	3	4	2	0	0	1	2	0	0	0	1	2	0	0	0
295	北京	3	0	0	0	0	0	3	2	2	1	1	2	1	1	1	2	5	5	5	4	4	1	0	0	0	0	0	4	1	0	0	0	0	3	0	0	0	0	1	0	0	0	0	2	0	0	0	0
296	北京	1	3	0	0	0	0	3	2	2	4	1	4	5	1	2	2	3	3	4	4	3	2	8 不太重视000000000000000000000000000000000000000000000000000	0	0	0	0	1	5 报刊00000000000000000	0	0	0	0	5 报刊0000000000	0	0	0	0	1	0	0	0	0	1	0	0	0	0
298	北京	2	4	2	2	1	2	4	2	2	2	2	3	3	2	2	2	3	4	5	1	4	2	8 比较麻烦周围人没有打的0000000000000000000000000000000000000	0	0	0	0	3	4	2	0	0	0	1	0	0	0	0	1	0	0	0	0	1	0	0	0	0
300	北京	3	0	0	0	0	0	3	3	3	2	2	2	2	1	1	2	5	5	5	5	4	2	8 不知道00000000000000000000000000000000000000000000000000000	0	0	0	0	2	3	0	0	0	0	1	0	0	0	0	1	0	0	0	0	1	0	0	0	0
304	北京	1	1	0	0	0	0	5	1	1	1	1	1	1	1	1	2	5	5	5	5	5	2	2	0	0	0	0	4	1	0	0	0	0	1	0	0	0	0	1	0	0	0	0	1	0	0	0	0
308	北京	3	0	0	0	0	0	5	1	1	1	2	1	1	1	1	2	5	5	5	5	4	2	8 没感冒00000000000000000000000000000000000000000000000000000	0	0	0	0	2	1	4	0	0	0	1	0	0	0	0	1	0	0	0	0	1	0	0	0	0
309	北京	3	0	0	0	0	0	3	3	2	1	5	1	1	1	2	1	5	5	1	5	1	2	8 没时间00000000000000000000000000000000000000000000000000000	2	0	0	0	4	4	3	1	0	0	1	3	0	0	0	1	0	0	0	0	1	0	0	0	0
310	北京	2	3	0	0	0	0	4	2	1	1	5	1	2	1	2	2	4	4	4	5	4	1	0	0	0	0	0	3	1	0	0	0	0	1	0	0	0	0	1	0	0	0	0	1	0	0	0	0
311	北京	1	4	2	2	2	1	4	3	3	1	1	1	1	1	1	2	5	5	5	5	5	2	2	0	0	0	0	4	1	3	0	0	0	5 街道0000000000	2	0	0	0	1	2	0	0	0	2	0	0	0	0
313	北京	3	0	0	0	0	0	2	2	2	1	1	1	1	1	1	2	5	5	3	5	4	2	8 过敏0000000000000000000000000000000000000000000000000000000	0	0	0	0	3	4	1	2	0	0	2	4	0	0	0	1	2	0	0	0	1	0	0	0	0
316	北京	3	0	0	0	0	0	4	1	1	1	2	1	3	1	1	2	5	5	5	5	5	2	2	8 经常运动 多吃蔬菜00000000	0	0	0	3	1	0	0	0	0	2	0	0	0	0	1	0	0	0	0	2	0	0	0	0
317	北京	2	3	0	0	0	0	4	1	1	3	2	1	1	1	1	2	5	2	4	5	5	2	8 当时没有时间。000000000000000000000000000000000000000000000	0	0	0	0	3	1	0	0	0	0	2	0	0	0	0	1	0	0	0	0	2	0	0	0	0
318	北京	3	0	0	0	0	0	3	1	1	5	1	1	1	1	1	2	5	5	5	5	5	2	6	8 不清自己接种那种疫苗000000	0	0	0	3	1	2	0	0	0	1	2	0	0	0	1	2	0	0	0	1	2	0	0	0
320	北京	3	0	0	0	0	0	2	2	2	1	1	4	3	1	1	2	4	4	5	5	5	2	8 不清楚这方面情况0000000000000000000000000000000000000000000	0	0	0	0	3	5 网络00000000000000000	0	0	0	0	5 网络0000000000	0	0	0	0	1	0	0	0	0	1	0	0	0	0
324	北京	1	4	1	2	1	1	1	2	3	2	2	3	3	1	2	2	5	3	3	3	5	2	2	8 没有大范围的暴发就不会注射	0	0	0	4	1	4	0	0	0	4	1	0	0	0	1	0	0	0	0	1	0	0	0	0
326	北京	1	4	2	1	1	1	3	2	2	1	3	2	2	1	2	2	5	4	5	4	5	2	8 注射疫苗只是针对某些病毒00000000000000000000000000000000000	0	0	0	0	2	1	2	4	3	0	2	0	0	0	0	1	2	0	0	0	1	2	0	0	0
327	北京	3	0	0	0	0	0	5	1	1	1	2	1	1	1	1	2	2	5	5	5	1	1	0	0	0	0	0	4	1	0	0	0	0	1	0	0	0	0	1	0	0	0	0	1	0	0	0	0
328	北京	1	2	0	0	0	0	2	1	1	1	1	1	1	1	2	2	5	4	2	4	3	2	2	1	0	0	0	3	1	5 居委会0000	0	0	0	1	4	0	0	0	1	0	0	0	0	5 居委会镇里000000	1	0	0	0
329	北京	3	0	0	0	0	0	5	2	2	1	1	1	1	1	1	2	5	2	5	5	5	2	8 不在比较忙0000000000000000000000000000000000000000000000000	0	0	0	0	1	2	1	0	0	0	2	1	0	0	0	1	0	0	0	0	2	0	0	0	0
333	北京	1	3	0	0	0	0	5	1	1	1	1	1	2	1	1	2	4	5	4	5	5	2	8 没有时间000000000000000000000000000000000000000000000000000	0	0	0	0	2	1	2	0	0	0	2	1	0	0	0	1	2	0	0	0	1	2	0	0	0
334	北京	3	0	0	0	0	0	5	1	1	3	4	1	1	2	1	2	5	5	5	5	5	2	7	0	0	0	0	4	1	0	0	0	0	1	0	0	0	0	1	0	0	0	0	1	0	0	0	0
337	北京	3	0	0	0	0	0	5	2	3	3	5	5	5	1	2	2	5	5	5	4	2	2	8	0	0	0	0	4	2	0	0	0	0	3	0	0	0	0	2	1	0	0	0	2	1	0	0	0
338	北京	3	0	0	0	0	0	5	3	4	2	1	2	2	1	1	2	4	3	1	3	3	1	0	0	0	0	0	3	1	0	0	0	0	1	2	0	0	0	1	0	0	0	0	1	0	0	0	0
339	北京	2	1	0	0	0	0	4	2	3	3	3	4	3	1	1	2	5	5	5	5	5	2	8 没有通知000000000000000000000000000000000000000000000000000	0	0	0	0	3	1	2	3	0	0	2	0	0	0	0	1	0	0	0	0	1	0	0	0	0
341	北京	2	3	0	0	0	0	4	3	3	4	2	2	3	1	1	2	4	3	2	3	5	2	2	5	0	0	0	4	1	2	0	0	0	1	2	0	0	0	1	2	0	0	0	1	2	0	0	0
342	北京	2	5	0	0	0	0	5	1	1	1	5	3	3	2	2	2	5	5	5	5	3	2	6	0	0	0	0	3	4	1	0	0	0	5 不知道那里有00	0	0	0	0	2	1	0	0	0	1	2	0	0	0
345	北京	1	1	0	0	0	0	5	1	1	2	3	4	5	1	1	2	5	5	3	4	4	1	0	0	0	0	0	3	4	0	0	0	0	2	0	0	0	0	1	0	0	0	0	1	0	0	0	0
346	北京	1	6 人之间相互传染	0	0	0	0	5	1	3	1	5	1	3	1	1	2	5	5	4	5	5	2	8 自己有病自己不适合打000000000000000000000000000000000000000	0	0	0	0	4	1	0	0	0	0	2	0	0	0	0	1	0	0	0	0	5 医院000000000000	1	0	0	0
347	北京	3	0	0	0	0	0	5	1	1	2	5	5	3	1	1	2	5	5	5	5	5	1	0	0	0	0	0	3	1	2	0	0	0	1	0	0	0	0	1	0	0	0	0	1	2	0	0	0
348	北京	3	0	0	0	0	0	5	2	2	1	1	4	5	1	1	2	4	5	1	5	5	1	0	0	0	0	0	1	1	0	0	0	0	4	0	0	0	0	1	0	0	0	0	2	0	0	0	0
350	北京	3	0	0	0	0	0	3	2	2	2	2	4	1	1	1	2	5	5	5	5	5	1	0	0	0	0	0	3	5 网站 单位00000000000	0	0	0	0	1	5 单位 网站	0	0	0	1	5 单位0000	0	0	0	1	5	0	0	0
351	北京	1	4	2	1	1	2	3	1	1	5	5	5	1	1	1	2	5	5	5	5	5	2	8 没时间00000000000000000000000000000000000000000000000000000	0	0	0	0	1	1	0	0	0	0	1	0	0	0	0	1	0	0	0	0	1	0	0	0	0
352	北京	1	4	1	2	1	1	5	3	1	1	1	2	1	1	1	2	4	5	5	5	5	2	2	0	0	0	0	3	4	3	0	0	0	4	0	0	0	0	1	0	0	0	0	1	0	0	0	0
357	北京	3	0	0	0	0	0	4	1	1	3	3	3	3	1	1	2	5	5	5	5	5	1	0	0	0	0	0	3	2	0	0	0	0	1	0	0	0	0	1	0	0	0	0	1	0	0	0	0
358	北京	1	1	0	0	0	0	3	3	3	1	2	2	1	1	1	2	4	5	5	5	4	1	0	0	0	0	0	3	4	1	3	0	0	2	0	0	0	0	4	0	0	0	0	2	0	0	0	0
359	北京	3	0	0	0	0	0	5	3	3	1	1	1	1	1	1	2	5	5	5	5	5	2	8 不知道00000000000000000000000000000000000000000000000000000	0	0	0	0	1	1	2	3	4	0	1	0	0	0	0	1	0	0	0	0	1	0	0	0	0
363	北京	1	4	2	1	1	2	3	2	2	2	2	1	3	1	1	1	5	5	5	5	5	2	8 没意识没通知00000000000000000000000000000000000000000000000	0	0	0	0	4	4	0	0	0	0	4	0	0	0	0	2	0	0	0	0	2	0	0	0	0
365	北京	3	0	0	0	0	0	5	2	2	3	2	2	1	1	1	2	5	5	5	5	5	2	4	0	0	0	0	3	1	2	0	0	0	2	0	0	0	0	1	2	0	0	0	2	1	0	0	0
368	北京	1	4	2	1	1	1	2	2	3	1	1	1	1	1	1	2	4	5	5	5	5	1	0	0	0	0	0	1	4	2	0	0	0	4	0	0	0	0	2	1	0	0	0	1	2	0	0	0
369	北京	3	0	0	0	0	0	5	1	1	5	3	4	4	1	2	2	3	5	5	3	5	2	2	0	0	0	0	4	3	0	0	0	0	4	0	0	0	0	1	0	0	0	0	1	0	0	0	0
371	北京	2	4	2	2	1	1	5	3	2	3	3	4	3	1	1	2	4	5	5	5	5	2	8 不会得00000000000000000000000000000000000000000000000000000	0	0	0	0	2	1	0	0	0	0	1	0	0	0	0	1	0	0	0	0	1	0	0	0	0
373	北京	1	3	0	0	0	0	5	3	3	4	1	1	1	2	2	2	5	5	5	6	5	2	2	0	0	0	0	3	3	0	0	0	0	3	0	0	0	0	3	0	0	0	0	1	0	0	0	0
374	北京	2	3	0	0	0	0	3	2	2	3	1	1	2	1	1	2	5	5	5	5	5	2	2	8 接处人少没必要000000000000	0	0	0	3	1	3	0	0	0	1	3	0	0	0	1	0	0	0	0	1	0	0	0	0
378	北京	3	0	0	0	0	0	4	1	1	2	5	1	1	1	1	2	5	5	5	5	5	2	8 周围没有得病的000000000000000000000000000000000000000000000	0	0	0	0	1	5 媒体 不知道是不是官方	0	0	0	0	4	1	0	0	0	4	0	0	0	0	1	0	0	0	0
380	北京	2	5	0	0	0	0	2	3	3	3	4	3	3	1	1	2	5	5	4	5	4	2	8 自己一般不会接处0000000000000000000000000000000000000000000	2	0	0	0	3	1	0	0	0	0	1	4	0	0	0	1	0	0	0	0	1	0	0	0	0
381	北京	3	0	0	0	0	0	6	1	1	1	1	1	1	1	1	2	5	5	5	5	5	2	8 免费才去000000000000000000000000000000000000000000000000000	0	0	0	0	3	1	0	0	0	0	1	0	0	0	0	1	0	0	0	0	1	0	0	0	0
382	北京	2	3	0	0	0	0	5	2	3	1	5	3	3	1	1	2	5	5	3	4	5	2	8 没有用过000000000000000000000000000000000000000000000000000	0	0	0	0	3	1	2	0	0	0	1	0	0	0	0	1	0	0	0	0	1	0	0	0	0
383	北京	3	0	0	0	0	0	5	1	1	5	1	1	1	2	1	2	5	5	1	5	5	2	8 没有意识000000000000000000000000000000000000000000000000000	0	0	0	0	2	4	0	0	0	0	5 不清楚00000000	0	0	0	0	2	0	0	0	0	2	0	0	0	0
385	北京	2	4	1	1	2	1	5	1	3	4	4	5	5	1	1	2	5	5	5	5	3	2	2	0	0	0	0	2	1	0	0	0	0	3	0	0	0	0	1	0	0	0	0	1	0	0	0	0
386	北京	2	1	0	0	0	0	2	1	1	1	1	1	1	1	1	2	5	5	5	5	5	2	2	0	0	0	0	3	2	0	0	0	0	4	1	5 小区00	0	0	2	1	0	0	0	1	2	0	0	0
387	北京	2	3	0	0	0	0	3	4	3	1	1	5	1	1	1	2	4	4	5	4	5	2	2	0	0	0	0	3	1	0	0	0	0	3	0	0	0	0	1	0	0	0	0	1	0	0	0	0
388	北京	2	4	1	1	1	1	1	2	2	1	5	2	1	1	1	2	5	5	5	5	5	2	4	0	0	0	0	3	2	0	0	0	0	3	0	0	0	0	3	0	0	0	0	2	0	0	0	0
391	北京	3	0	0	0	0	0	6	1	3	1	5	1	1	1	1	2	5	5	2	5	4	2	2	0	0	0	0	3	1	3	0	0	0	1	3	0	0	0	1	0	0	0	0	2	0	0	0	0
393	北京	3	0	0	0	0	0	5	3	2	3	3	4	4	1	1	2	5	5	5	5	4	2	2	0	0	0	0	4	1	0	0	0	0	1	0	0	0	0	1	0	0	0	0	5 不关心0000000000	0	0	0	0
394	北京	3	0	0	0	0	0	3	3	1	5	3	3	3	2	2	2	4	5	5	5	5	2	8 没有听说过0000000000000000000000000000000000000000000000000	0	0	0	0	4	3	1	0	0	0	1	2	0	0	0	1	0	0	0	0	1	2	0	0	0
396	北京	1	3	0	0	0	0	2	2	2	1	1	1	1	1	1	2	5	3	5	5	4	2	8 不需要注射0000000000000000000000000000000000000000000000000	0	0	0	0	3	3	4	0	0	0	1	0	0	0	0	3	0	0	0	0	1	0	0	0	0
398	北京	1	4	2	1	2	1	4	1	1	5	1	1	5	1	1	2	5	5	5	5	5	2	7	6	0	0	0	2	2	1	0	0	0	2	0	0	0	0	2	0	0	0	0	2	0	0	0	0
399	北京	3	0	0	0	0	0	3	1	1	5	5	5	5	1	1	2	1	5	5	5	1	2	2	0	0	0	0	3	2	0	0	0	0	2	0	0	0	0	2	0	0	0	0	2	0	0	0	0
400	北京	2	5	0	0	0	0	1	3	2	1	1	1	1	1	1	2	3	4	5	5	5	2	2	0	0	0	0	4	3	0	0	0	0	3	0	0	0	0	3	0	0	0	0	1	0	0	0	0
401	北京	2	4	2	1	1	1	3	2	2	1	1	3	3	1	1	2	5	5	5	5	5	2	2	0	0	0	0	2	1	0	0	0	0	5 医院0000000000	0	0	0	0	1	0	0	0	0	1	0	0	0	0
404	北京	1	3	0	0	0	0	2	2	3	3	4	3	2	1	1	2	4	4	5	5	5	2	2	8 自己的年龄0000000000000000	0	0	0	1	1	4	0	0	0	1	2	0	0	0	2	1	0	0	0	1	2	0	0	0
405	北京	2	3	0	0	0	0	3	2	3	1	3	3	2	1	1	2	3	5	5	5	4	2	2	0	0	0	0	4	3	2	1	0	0	1	0	0	0	0	1	0	0	0	0	1	0	0	0	0
409	北京	3	0	0	0	0	0	3	2	2	1	2	2	3	1	2	2	3	5	5	5	5	1	0	0	0	0	0	3	3	0	0	0	0	1	0	0	0	0	2	0	0	0	0	2	1	0	0	0
410	北京	3	0	0	0	0	0	5	1	1	4	5	5	5	1	1	2	3	5	5	5	1	2	2	0	0	0	0	1	4	0	0	0	0	2	0	0	0	0	1	0	0	0	0	2	0	0	0	0
413	北京	3	0	0	0	0	0	5	2	1	1	1	2	3	1	1	2	5	5	5	5	4	2	8 不相信00000000000000000000000000000000000000000000000000000	0	0	0	0	3	1	2	3	4	0	2	0	0	0	0	2	1	0	0	0	6	0	0	0	0
415	北京	3	0	0	0	0	0	2	2	2	1	1	1	1	1	1	2	5	5	4	5	5	2	2	0	0	0	0	1	1	4	0	0	0	2	0	0	0	0	1	0	0	0	0	1	2	0	0	0
418	北京	3	0	0	0	0	0	5	1	1	1	1	1	1	1	1	2	5	5	5	3	4	2	2	0	0	0	0	4	1	2	0	0	0	1	0	0	0	0	1	0	0	0	0	1	0	0	0	0
419	北京	1	3	0	0	0	0	5	4	4	6	4	4	4	1	1	2	4	5	5	3	4	2	8 没有这个习惯00000000000000000000000000000000000000000000000	0	0	0	0	3	1	2	0	0	0	2	0	0	0	0	1	0	0	0	0	6	0	0	0	0
420	北京	3	0	0	0	0	0	3	1	2	1	4	4	3	1	1	2	5	5	5	5	5	2	8	2	3	0	0	3	1	0	0	0	0	1	2	0	0	0	1	0	0	0	0	1	2	0	0	0
422	北京	3	0	0	0	0	0	5	3	3	1	2	4	2	1	1	2	5	5	5	5	5	2	2	0	0	0	0	3	1	2	0	0	0	1	2	0	0	0	1	0	0	0	0	1	0	0	0	0
426	北京	3	0	0	0	0	0	5	1	1	1	1	5	5	1	2	2	5	5	5	5	5	2	2	0	0	0	0	1	5 电视00000000000000000	0	0	0	0	2	0	0	0	0	5 电视0000000000000000	0	0	0	0	2	0	0	0	0
427	北京	1	4	1	1	1	1	5	1	1	1	1	1	1	1	1	2	5	5	5	5	5	1	0	0	0	0	0	4	1	3	0	0	0	1	2	0	0	0	1	0	0	0	0	2	1	0	0	0
428	北京	3	0	0	0	0	0	5	1	1	1	3	1	1	1	1	2	5	5	5	5	5	2	8 不知道有这个服务0000000000000000000000000000000000000000000	0	0	0	0	3	1	0	0	0	0	4	1	0	0	0	1	0	0	0	0	5 医院000000000000	0	0	0	0
429	北京	2	4	2	1	2	2	4	4	3	1	4	2	1	1	1	2	3	5	5	5	3	2	8 自己年轻没关系000000000000000000000000000000000000000000000	0	0	0	0	3	3	0	0	0	0	1	0	0	0	0	4	0	0	0	0	1	0	0	0	0
431	北京	3	0	0	0	0	0	4	1	1	5	4	4	3	1	1	2	2	2	1	2	3	2	8 没有听说。0000000000000000000000000000000000000000000000000	0	0	0	0	4	1	0	0	0	0	4	0	0	0	0	1	0	0	0	0	1	0	0	0	0
433	北京	2	4	2	1	1	2	5	1	2	1	4	5	4	1	1	2	2	4	5	3	2	2	8 自己对普通流感不了解000000000000000000000000000000000000000	0	0	0	0	2	1	0	0	0	0	4	0	0	0	0	1	0	0	0	0	1	0	0	0	0
435	北京	3	0	0	0	0	0	5	1	1	5	1	1	1	1	1	2	5	5	5	5	5	2	2	0	0	0	0	1	1	0	0	0	0	1	0	0	0	0	1	0	0	0	0	1	0	0	0	0
437	北京	2	4	1	2	2	2	2	1	2	4	3	3	3	1	1	2	5	5	5	3	2	2	8 不知道有疫苗00000000000000000000000000000000000000000000000	0	0	0	0	3	1	2	3	4	0	2	0	0	0	0	2	0	0	0	0	2	0	0	0	0
439	北京	2	4	1	1	1	1	5	1	1	1	2	1	2	1	2	2	5	5	5	5	5	2	2	4	0	0	0	3	1	0	0	0	0	2	0	0	0	0	1	0	0	0	0	2	0	0	0	0
441	北京	3	0	0	0	0	0	3	1	1	2	6	1	1	1	2	2	5	5	5	5	5	1	0	0	0	0	0	2	1	2	0	0	0	2	0	0	0	0	1	0	0	0	0	2	0	0	0	0
443	北京	1	4	1	1	1	1	3	3	3	3	2	4	1	1	1	2	5	5	5	5	5	1	0	0	0	0	0	4	5 网络00000000000000000	0	0	0	0	5 做医药的000000	0	0	0	0	1	0	0	0	0	1	0	0	0	0
444	北京	1	4	2	1	1	1	4	2	2	2	2	2	1	1	1	2	5	4	5	5	4	2	2	0	0	0	0	4	1	2	0	0	0	1	3	0	0	0	1	2	0	0	0	2	1	0	0	0
447	北京	3	0	0	0	0	0	4	1	1	5	5	1	1	2	1	2	5	5	5	5	5	2	2	0	0	0	0	3	1	0	0	0	0	2	0	0	0	0	1	0	0	0	0	2	0	0	0	0
450	北京	3	0	0	0	0	0	4	1	1	1	1	1	1	1	1	2	5	5	5	5	5	1	0	0	0	0	0	2	1	2	3	4	0	1	2	3	4	0	1	2	0	0	0	1	2	0	0	0
451	北京	3	0	0	0	0	0	5	1	1	1	1	1	1	1	1	2	5	5	5	5	5	2	2	0	0	0	0	1	5 不清楚000000000000000	0	0	0	0	5 不清楚00000000	0	0	0	0	6	0	0	0	0	2	0	0	0	0
454	北京	2	6 不知道00000000	0	0	0	0	5	1	3	1	4	2	2	1	1	2	4	5	5	4	5	2	2	4	0	0	0	4	2	0	0	0	0	2	0	0	0	0	6	0	0	0	0	1	0	0	0	0
455	北京	3	0	0	0	0	0	5	1	1	1	5	2	3	1	2	2	5	4	5	5	5	2	4	0	0	0	0	3	3	0	0	0	0	1	0	0	0	0	1	0	0	0	0	1	0	0	0	0
457	北京	1	3	0	0	0	0	4	1	1	1	2	1	4	1	1	2	5	5	5	5	5	1	0	0	0	0	0	3	5 听老师说。00000000000	0	0	0	0	1	0	0	0	0	2	0	0	0	0	2	0	0	0	0
459	北京	1	4	2	1	1	1	5	1	2	1	1	3	2	1	1	2	5	5	5	5	5	2	8 没有想过去接种000000000000000000000000000000000000000000000	0	0	0	0	2	3	1	2	0	0	3	1	2	0	0	2	1	0	0	0	1	2	0	0	0
460	北京	2	2	0	0	0	0	5	1	1	5	4	4	1	1	1	2	5	5	5	5	4	2	2	0	0	0	0	4	4	1	0	0	0	1	0	0	0	0	1	0	0	0	0	1	0	0	0	0
461	北京	3	0	0	0	0	0	3	4	3	1	2	1	1	1	1	2	5	5	1	5	5	2	2	0	0	0	0	2	5 报纸00000000000000000	1	0	0	0	2	0	0	0	0	1	0	0	0	0	2	0	0	0	0
462	北京	2	4	1	1	1	2	5	1	3	1	1	1	1	1	1	2	5	5	5	5	5	1	0	0	0	0	0	1	1	0	0	0	0	1	0	0	0	0	1	0	0	0	0	1	0	0	0	0
464	北京	2	6 不知道00000000	0	0	0	0	5	1	1	1	1	1	1	1	1	2	5	5	5	4	5	1	0	0	0	0	0	1	1	2	0	0	0	3	0	0	0	0	1	3	0	0	0	1	2	0	0	0
466	北京	2	4	2	2	2	1	5	2	2	2	3	2	3	1	1	2	3	2	1	4	1	2	8 不知道00000000000000000000000000000000000000000000000000000	0	0	0	0	3	4	1	2	0	0	4	1	2	0	0	1	0	0	0	0	1	0	0	0	0
467	北京	2	3	0	0	0	0	4	3	3	1	1	5	5	1	1	2	5	3	4	5	2	2	7	0	0	0	0	4	1	3	0	0	0	5 社区0000000000	1	0	0	0	1	2	0	0	0	1	2	0	0	0
468	北京	2	3	0	0	0	0	3	1	2	5	1	5	1	1	1	2	3	5	5	5	3	2	2	0	0	0	0	3	5 不记的000000000000000	0	0	0	0	4	0	0	0	0	1	0	0	0	0	1	0	0	0	0
469	北京	2	4	1	1	1	1	3	1	1	5	5	5	1	1	1	2	5	5	5	5	5	2	2	0	0	0	0	3	3	0	0	0	0	3	0	0	0	0	2	0	0	0	0	2	0	0	0	0
472	北京	3	0	0	0	0	0	3	2	2	1	1	2	4	1	1	2	5	5	4	5	4	2	8 怀孕0000000000000000000000000000000000000000000000000000000	0	0	0	0	3	1	0	0	0	0	1	0	0	0	0	1	0	0	0	0	1	3	0	0	0
474	北京	3	0	0	0	0	0	5	3	2	3	5	5	5	2	1	2	5	5	1	5	3	2	8 有糖尿病不给注射0000000000000000000000000000000000000000000	0	0	0	0	4	5 不知道这些信息0000000	0	0	0	0	5 不知道00000000	0	0	0	0	1	2	0	0	0	2	0	0	0	0
475	北京	2	3	0	0	0	0	5	1	1	1	1	3	5	1	1	2	3	5	3	5	5	2	2	0	0	0	0	3	5 报纸网络0000000000000	4	0	0	0	5 单位0000000000	0	0	0	0	5 报纸0000000000000000	0	0	0	0	5 报纸000000000000	0	0	0	0
476	北京	3	0	0	0	0	0	5	3	3	2	2	3	2	1	2	2	4	5	5	5	3	2	2	0	0	0	0	3	1	2	3	4	0	1	2	3	4	0	4	3	0	0	0	5 医院000000000000	0	0	0	0
477	北京	3	0	0	0	0	0	3	1	3	4	5	5	2	1	1	2	4	3	1	5	1	2	8 没赶上注射疫苗000000000000000000000000000000000000000000000	0	0	0	0	1	1	0	0	0	0	1	0	0	0	0	1	0	0	0	0	1	2	0	0	0
478	北京	2	2	0	0	0	0	2	3	3	3	3	3	4	1	2	2	5	5	5	5	5	2	8 没必要00000000000000000000000000000000000000000000000000000	0	0	0	0	3	1	2	3	0	0	1	3	2	0	0	1	0	0	0	0	1	0	0	0	0
480	北京	3	0	0	0	0	0	4	1	2	1	2	6	1	1	1	2	5	5	5	5	5	1	0	0	0	0	0	3	1	0	0	0	0	1	0	0	0	0	1	0	0	0	0	1	0	0	0	0
481	北京	1	3	0	0	0	0	5	2	3	3	3	5	1	1	1	2	5	5	1	5	3	2	2	0	0	0	0	3	1	0	0	0	0	1	0	0	0	0	1	0	0	0	0	1	0	0	0	0
483	北京	3	0	0	0	0	0	3	2	4	5	1	3	5	1	1	2	5	3	1	3	5	1	0	0	0	0	0	3	4	0	0	0	0	4	0	0	0	0	2	0	0	0	0	4	0	0	0	0
485	北京	3	0	0	0	0	0	2	2	2	1	2	1	1	1	1	2	5	4	5	5	4	2	2	0	0	0	0	3	1	0	0	0	0	2	0	0	0	0	2	0	0	0	0	1	0	0	0	0
486	北京	3	0	0	0	0	0	5	2	2	1	2	2	5	2	1	2	5	5	5	5	5	2	2	0	0	0	0	1	3	0	0	0	0	4	0	0	0	0	1	0	0	0	0	1	0	0	0	0
487	北京	3	0	0	0	0	0	5	1	1	1	1	2	2	1	1	2	4	5	4	5	4	2	8 不想去接种0000000000000000000000000000000000000000000000000	0	0	0	0	3	1	2	0	0	0	5 药店0000000000	0	0	0	0	6	0	0	0	0	6	0	0	0	0
488	北京	2	3	0	0	0	0	1	5	5	1	3	4	2	1	1	2	5	5	5	5	5	2	1	2	0	0	0	3	2	1	4	0	0	1	2	4	0	0	1	0	0	0	0	1	0	0	0	0
489	北京	1	3	0	0	0	0	4	3	4	1	2	4	4	1	1	2	5	5	5	5	5	2	2	0	0	0	0	1	2	0	0	0	0	1	0	0	0	0	2	0	0	0	0	2	0	0	0	0
493	北京	2	1	0	0	0	0	4	2	2	1	2	4	3	1	1	2	4	5	5	5	3	2	2	8 单位没有组织00000000000000	0	0	0	4	1	2	0	0	0	1	2	0	0	0	1	0	0	0	0	1	0	0	0	0
494	北京	3	0	0	0	0	0	4	1	1	1	2	3	1	2	2	2	5	5	5	5	5	2	8 没有注射疫苗的意识00000000000000000000000000000000000000000	0	0	0	0	1	4	0	0	0	0	4	5 单位00000	0	0	0	6	0	0	0	0	1	0	0	0	0
495	北京	2	3	0	0	0	0	2	3	2	1	1	1	1	1	1	2	5	5	5	5	5	1	0	0	0	0	0	4	4	0	0	0	0	4	0	0	0	0	1	0	0	0	0	1	0	0	0	0
496	北京	2	5	0	0	0	0	5	1	2	2	3	1	3	1	1	2	3	3	5	5	5	2	8 没有时间000000000000000000000000000000000000000000000000000	0	0	0	0	1	3	2	1	0	0	4	0	0	0	0	1	0	0	0	0	2	0	0	0	0
497	北京	3	0	0	0	0	0	5	1	1	1	1	1	1	2	2	2	5	5	5	5	5	2	8 60岁以上注射00000000000000000000000000000000000000000000000	0	0	0	0	1	1	0	0	0	0	1	0	0	0	0	1	0	0	0	0	1	2	0	0	0
499	北京	3	0	0	0	0	0	5	2	1	1	1	1	1	1	1	2	5	5	5	3	5	2	8 北京比较安全00000000000000000000000000000000000000000000000	0	0	0	0	3	2	0	0	0	0	2	0	0	0	0	2	0	0	0	0	2	0	0	0	0
500	北京	3	0	0	0	0	0	5	1	1	2	5	3	3	1	1	2	4	5	5	4	3	2	2	0	0	0	0	4	1	0	0	0	0	4	0	0	0	0	4	1	0	0	0	2	0	0	0	0
501	北京	1	4	2	2	1	1	3	3	3	2	3	3	2	1	1	2	5	5	5	5	5	2	2	0	0	0	0	4	2	1	3	4	0	3	4	2	1	0	2	1	0	0	0	2	1	0	0	0
502	北京	3	0	0	0	0	0	5	1	1	5	5	5	4	1	1	2	5	5	5	5	4	1	0	0	0	0	0	3	1	0	0	0	0	3	0	0	0	0	1	0	0	0	0	2	0	0	0	0
504	北京	2	1	0	0	0	0	2	1	3	1	1	1	1	1	1	2	5	4	5	5	4	2	2	0	0	0	0	3	1	2	0	0	0	1	0	0	0	0	1	0	0	0	0	1	0	0	0	0
505	北京	2	4	2	2	2	1	5	1	1	1	2	1	1	1	2	2	5	5	5	5	5	1	0	0	0	0	0	4	1	0	0	0	0	1	0	0	0	0	1	0	0	0	0	1	0	0	0	0
506	北京	3	0	0	0	0	0	5	3	1	1	1	3	4	1	2	2	4	5	5	5	4	2	2	0	0	0	0	3	3	0	0	0	0	4	0	0	0	0	2	0	0	0	0	2	0	0	0	0
507	北京	3	0	0	0	0	0	5	1	2	1	1	1	2	1	1	2	5	5	5	5	5	2	2	0	0	0	0	4	1	0	0	0	0	5 单位0000000000	0	0	0	0	1	0	0	0	0	1	0	0	0	0
508	北京	3	0	0	0	0	0	5	3	4	5	3	3	4	1	1	2	3	2	1	3	3	1	0	0	0	0	0	3	4	0	0	0	0	4	0	0	0	0	4	0	0	0	0	1	0	0	0	0
510	北京	2	1	0	0	0	0	3	1	2	1	1	1	3	1	1	2	5	5	5	5	5	2	3	0	0	0	0	3	1	2	0	0	0	4	0	0	0	0	1	2	0	0	0	1	2	0	0	0
511	北京	2	4	2	1	1	2	4	2	2	1	1	3	3	1	1	2	5	5	4	4	4	2	2	0	0	0	0	2	3	0	0	0	0	4	0	0	0	0	1	0	0	0	0	1	0	0	0	0
515	北京	3	0	0	0	0	0	4	3	2	1	3	2	3	1	1	2	5	5	5	5	5	2	2	0	0	0	0	1	1	0	0	0	0	2	0	0	0	0	1	0	0	0	0	1	0	0	0	0
516	北京	3	0	0	0	0	0	2	3	5	2	5	5	2	1	1	2	5	5	5	5	3	2	2	0	0	0	0	3	4	1	2	0	0	2	0	0	0	0	1	2	0	0	0	1	2	0	0	0
517	北京	3	0	0	0	0	0	5	1	1	1	1	5	5	1	1	2	5	5	5	5	5	1	0	0	0	0	0	3	3	2	1	0	0	1	0	0	0	0	1	0	0	0	0	1	0	0	0	0
518	北京	3	0	0	0	0	0	5	1	1	3	5	5	4	1	1	2	3	5	5	5	4	2	3	0	0	0	0	3	2	1	0	0	0	1	0	0	0	0	2	1	0	0	0	1	0	0	0	0
519	北京	1	4	1	1	1	1	5	2	2	2	2	2	2	1	1	2	4	4	4	4	5	2	4	0	0	0	0	3	3	1	2	0	0	2	0	0	0	0	1	2	3	0	0	2	1	0	0	0
520	北京	3	0	0	0	0	0	2	1	1	1	1	1	3	1	1	2	4	5	5	5	5	2	2	0	0	0	0	3	1	0	0	0	0	4	0	0	0	0	1	0	0	0	0	2	0	0	0	0
524	北京	3	0	0	0	0	0	4	3	3	2	3	1	2	1	1	2	4	4	5	5	4	2	4	0	0	0	0	1	1	2	3	4	0	1	2	0	0	0	1	0	0	0	0	1	0	0	0	0
525	北京	3	0	0	0	0	0	5	1	1	1	1	1	1	1	1	2	4	4	5	5	5	2	8 不知道要注射。000000000000000000000000000000000000000000000	0	0	0	0	3	3	0	0	0	0	3	0	0	0	0	3	0	0	0	0	2	0	0	0	0
527	北京	2	4	2	1	1	2	2	2	2	3	2	1	1	1	1	2	5	5	5	5	3	1	0	0	0	0	0	2	1	3	0	0	0	1	0	0	0	0	1	0	0	0	0	1	0	0	0	0
532	北京	2	3	0	0	0	0	5	1	2	6	2	2	1	1	1	2	5	5	5	5	5	2	8 在自身的防护00000000000000000000000000000000000000000000000	0	0	0	0	3	1	0	0	0	0	5 医疗机构000000	0	0	0	0	1	0	0	0	0	1	0	0	0	0
536	北京	1	4	1	2	1	2	5	1	1	3	5	5	1	1	1	2	5	5	5	5	5	2	8 经济不好000000000000000000000000000000000000000000000000000	0	0	0	0	3	2	1	0	0	0	3	0	0	0	0	1	0	0	0	0	1	0	0	0	0
539	北京	1	4	1	1	1	1	6	1	2	2	1	6	1	1	1	1	5	5	5	5	4	2	8 没有必要。0000000000000000000000000000000000000000000000000	0	0	0	0	4	1	3	2	0	0	2	0	0	0	0	1	0	0	0	0	1	0	0	0	0
540	北京	3	0	0	0	0	0	5	2	2	1	3	3	1	1	1	2	5	5	4	5	4	2	2	0	0	0	0	3	3	1	0	0	0	1	4	0	0	0	1	0	0	0	0	1	0	0	0	0
541	北京	3	0	0	0	0	0	2	3	5	1	1	1	1	1	1	1	5	5	5	5	5	2	2	0	0	0	0	3	1	0	0	0	0	1	0	0	0	0	1	0	0	0	0	1	0	0	0	0
543	北京	3	0	0	0	0	0	4	1	1	1	1	1	2	1	1	2	3	3	5	5	2	1	0	0	0	0	0	2	4	2	0	0	0	2	0	0	0	0	1	0	0	0	0	2	0	0	0	0
545	北京	3	0	0	0	0	0	2	1	1	1	1	3	1	1	1	2	5	5	5	5	5	2	2	0	0	0	0	1	4	0	0	0	0	1	0	0	0	0	4	0	0	0	0	1	0	0	0	0
546	北京	2	6 病毒0000000000	0	0	0	0	5	1	1	5	1	2	1	1	1	2	5	5	5	5	5	2	2	0	0	0	0	3	1	0	0	0	0	1	0	0	0	0	1	0	0	0	0	1	0	0	0	0
548	北京	3	0	0	0	0	0	5	2	2	1	1	1	1	1	1	2	4	4	5	5	5	2	8 you00000000000000000000000000000000000000000000000000000000	0	0	0	0	4	1	0	0	0	0	1	0	0	0	0	1	0	0	0	0	5 比较正规的大医院	0	0	0	0
549	北京	3	0	0	0	0	0	5	4	3	4	3	1	5	1	2	2	3	4	4	4	4	2	8 不知道要注射疫苗0000000000000000000000000000000000000000000	0	0	0	0	3	1	0	0	0	0	1	0	0	0	0	2	0	0	0	0	2	0	0	0	0
550	北京	1	4	2	1	1	2	4	2	2	1	4	5	5	2	2	2	5	5	5	2	3	2	2	0	0	0	0	4	2	0	0	0	0	2	1	4	0	0	1	0	0	0	0	1	2	4	0	0
552	北京	3	0	0	0	0	0	5	1	1	1	1	1	1	1	1	2	5	5	5	5	5	2	8 没有考虑过这方面问题000000000000000000000000000000000000000	0	0	0	0	4	2	4	0	0	0	2	0	0	0	0	2	0	0	0	0	2	0	0	0	0
555	北京	3	0	0	0	0	0	6	2	2	3	4	4	3	1	1	2	5	5	4	4	4	1	0	0	0	0	0	3	4	0	0	0	0	2	0	0	0	0	2	0	0	0	0	2	0	0	0	0
556	北京	3	0	0	0	0	0	2	1	2	1	3	3	2	1	1	2	5	5	3	2	1	2	8 工作太忙没 时间00000000000000000000000000000000000000000000	0	0	0	0	1	1	2	0	0	0	5 医院0000000000	0	0	0	0	1	0	0	0	0	2	0	0	0	0
557	北京	1	4	1	1	1	1	2	1	1	1	1	1	1	1	1	2	5	5	5	5	5	2	6	0	0	0	0	1	1	0	0	0	0	1	0	0	0	0	1	0	0	0	0	2	0	0	0	0
558	北京	2	1	0	0	0	0	5	2	2	2	2	3	2	1	1	2	5	5	5	5	5	2	8 用处不大.00000000000000000000000000000000000000000000000000	0	0	0	0	4	1	2	0	0	0	2	1	0	0	0	2	1	0	0	0	2	1	0	0	0
561	北京	3	0	0	0	0	0	5	2	4	2	5	5	5	2	1	2	5	4	5	4	2	2	7	0	0	0	0	4	1	5 电视000000	0	0	0	1	0	0	0	0	1	0	0	0	0	1	0	0	0	0
562	北京	3	0	0	0	0	0	5	1	1	1	5	1	1	1	1	2	5	5	1	5	1	2	2	0	0	0	0	1	1	0	0	0	0	4	0	0	0	0	1	0	0	0	0	1	0	0	0	0
563	北京	2	3	0	0	0	0	3	2	2	1	3	4	3	1	1	2	5	5	4	5	5	2	8 没想到要注射疫苗0000000000000000000000000000000000000000000	0	0	0	0	1	1	2	0	0	0	4	0	0	0	0	1	0	0	0	0	2	0	0	0	0
564	北京	1	3	0	0	0	0	4	4	2	3	3	2	2	1	1	2	4	4	4	5	4	2	4	0	0	0	0	1	1	0	0	0	0	1	0	0	0	0	1	0	0	0	0	1	0	0	0	0
565	北京	1	3	0	0	0	0	6	2	2	1	1	1	1	1	1	2	4	5	5	5	5	2	8 无所谓。000000000000000000000000000000000000000000000000000	0	0	0	0	4	1	0	0	0	0	1	0	0	0	0	1	0	0	0	0	1	0	0	0	0
566	北京	3	0	0	0	0	0	5	1	3	1	1	1	1	1	1	2	5	5	5	5	5	2	2	0	0	0	0	4	1	4	5 医院	0	0	5 医院0000000000	0	0	0	0	5 医院0000000000000000	0	0	0	0	5 医院000000000000	0	0	0	0
569	北京	3	0	0	0	0	0	3	1	5	1	5	1	5	1	1	2	5	5	1	5	5	2	8 觉得没有必要00000000000000000000000000000000000000000000000	0	0	0	0	4	1	0	0	0	0	5 没有0000000000	0	0	0	0	1	2	3	0	0	5 医疗000000000000	0	0	0	0
574	北京	1	4	1	1	1	1	2	2	3	5	3	3	3	1	1	2	5	5	5	5	5	2	2	0	0	0	0	4	1	2	0	0	0	1	2	0	0	0	1	0	0	0	0	1	0	0	0	0
575	北京	1	3	0	0	0	0	3	2	3	3	2	3	4	1	2	2	4	4	5	3	3	2	8 不知道00000000000000000000000000000000000000000000000000000	0	0	0	0	3	1	0	0	0	0	1	0	0	0	0	1	0	0	0	0	1	0	0	0	0
577	北京	3	0	0	0	0	0	5	3	3	1	1	1	5	1	1	2	5	3	5	5	5	2	8 得出去不方便00000000000000000000000000000000000000000000000	0	0	0	0	3	1	0	0	0	0	1	0	0	0	0	1	2	0	0	0	1	2	0	0	0
581	北京	2	4	2	2	1	1	2	2	2	1	2	2	2	1	1	2	5	5	5	5	5	1	0	0	0	0	0	1	1	2	0	0	0	1	2	0	0	0	1	2	0	0	0	1	2	0	0	0
582	北京	1	4	1	1	1	1	6	4	2	4	2	6	3	1	1	2	5	5	4	5	4	2	8 过敏0000000000000000000000000000000000000000000000000000000	0	0	0	0	3	1	2	0	0	0	1	2	0	0	0	1	2	0	0	0	1	2	0	0	0
587	北京	3	0	0	0	0	0	4	2	1	1	2	4	4	1	1	2	5	5	4	4	3	2	6	8 得流感的可能性小0000000000	0	0	0	3	1	3	0	0	0	3	2	0	0	0	2	0	0	0	0	2	0	0	0	0
588	北京	3	0	0	0	0	0	4	1	1	1	1	1	1	1	1	2	5	5	5	5	5	2	2	0	0	0	0	3	1	0	0	0	0	1	0	0	0	0	3	0	0	0	0	2	0	0	0	0
589	北京	2	5	0	0	0	0	5	1	1	1	1	1	1	1	2	2	5	5	5	5	5	1	0	0	0	0	0	2	3	0	0	0	0	4	0	0	0	0	1	0	0	0	0	1	0	0	0	0
591	北京	1	4	2	2	1	2	2	1	5	5	5	5	5	1	1	2	1	5	5	5	5	2	2	0	0	0	0	2	4	1	0	0	0	4	0	0	0	0	1	0	0	0	0	1	0	0	0	0
593	北京	1	1	0	0	0	0	2	2	3	1	4	5	3	1	2	2	5	5	2	5	5	2	8 单位组织000000000000000000000000000000000000000000000000000	0	0	0	0	1	1	0	0	0	0	1	0	0	0	0	1	0	0	0	0	5	2	0	0	0
594	北京	2	3	0	0	0	0	3	2	2	3	1	2	2	1	1	2	5	5	5	5	5	1	0	0	0	0	0	2	5 家人00000000000000000	0	0	0	0	5 医院0000000000	0	0	0	0	1	2	0	0	0	1	2	0	0	0
595	北京	3	0	0	0	0	0	5	1	1	5	1	5	5	1	1	2	2	5	5	5	1	2	2	0	0	0	0	3	3	0	0	0	0	2	0	0	0	0	3	0	0	0	0	2	0	0	0	0
596	北京	1	3	0	0	0	0	2	3	3	1	1	1	1	1	1	2	5	5	2	5	5	1	0	0	0	0	0	1	1	0	0	0	0	1	0	0	0	0	1	0	0	0	0	1	0	0	0	0
597	北京	1	4	1	2	2	2	4	1	2	1	2	1	2	1	2	2	5	5	5	5	5	2	3	0	0	0	0	3	1	2	0	0	0	1	2	0	0	0	1	0	0	0	0	1	0	0	0	0
599	北京	3	0	0	0	0	0	5	4	3	1	1	1	1	1	1	2	5	5	5	5	5	2	8 没时间00000000000000000000000000000000000000000000000000000	0	0	0	0	4	1	0	0	0	0	1	0	0	0	0	1	0	0	0	0	1	0	0	0	0
601	北京	2	3	0	0	0	0	3	3	3	1	2	4	4	1	1	1	4	3	5	4	4	2	2	0	0	0	0	3	1	2	4	3	0	2	1	4	0	0	2	0	0	0	0	1	0	0	0	0
602	北京	3	0	0	0	0	0	3	3	3	1	1	2	2	1	1	2	3	5	4	5	5	1	0	0	0	0	0	3	4	3	0	0	0	2	0	0	0	0	1	0	0	0	0	2	0	0	0	0
603	北京	1	4	2	1	1	1	4	3	4	1	1	1	1	1	2	2	5	5	5	5	5	2	8 单位没有组织00000000000000000000000000000000000000000000000	2	0	0	0	4	5 报纸00000000000000000	1	2	0	0	5 报纸0000000000	1	2	0	0	1	0	0	0	0	1	0	0	0	0
604	北京	3	0	0	0	0	0	5	1	1	5	1	1	1	1	1	2	4	4	4	5	5	2	2	0	0	0	0	4	3	4	1	0	0	1	0	0	0	0	1	0	0	0	0	1	0	0	0	0
606	北京	3	0	0	0	0	0	3	1	3	1	3	4	4	1	1	2	4	5	5	5	5	1	0	0	0	0	0	3	3	1	0	0	0	1	0	0	0	0	4	0	0	0	0	2	0	0	0	0
607	北京	1	4	2	1	1	2	4	1	3	1	4	2	1	1	2	2	5	2	5	5	1	2	1	0	0	0	0	4	3	0	0	0	0	1	0	0	0	0	1	0	0	0	0	1	0	0	0	0
610	北京	3	0	0	0	0	0	3	2	1	1	1	1	5	1	1	2	5	5	5	1	1	1	0	0	0	0	0	4	4	0	0	0	0	1	0	0	0	0	1	0	0	0	0	1	0	0	0	0
612	北京	3	0	0	0	0	0	5	1	1	1	1	3	3	1	1	2	2	5	3	4	5	2	2	0	0	0	0	2	3	0	0	0	0	2	0	0	0	0	4	0	0	0	0	1	0	0	0	0
613	北京	3	0	0	0	0	0	1	3	3	1	1	5	4	1	1	2	5	3	2	2	5	2	4	0	0	0	0	3	5 网络00000000000000000	0	0	0	0	1	5 网络00000	0	0	0	1	0	0	0	0	1	0	0	0	0
615	北京	3	0	0	0	0	0	4	2	2	1	1	1	1	1	1	2	5	5	5	5	5	2	8 自己怕疼。0000000000000000000000000000000000000000000000000	0	0	0	0	4	1	0	0	0	0	1	0	0	0	0	1	0	0	0	0	1	0	0	0	0
616	北京	3	0	0	0	0	0	5	1	1	1	1	1	1	1	1	2	5	5	5	5	5	2	2	0	0	0	0	4	3	4	0	0	0	1	2	0	0	0	4	0	0	0	0	2	0	0	0	0
619	北京	1	4	2	1	1	1	5	1	3	1	1	2	2	1	1	1	4	5	5	4	4	1	0	0	0	0	0	4	1	0	0	0	0	1	0	0	0	0	1	0	0	0	0	1	0	0	0	0
621	北京	3	0	0	0	0	0	5	1	4	1	4	4	4	2	2	2	5	5	5	5	3	2	8 不知道有疫苗00000000000000000000000000000000000000000000000	6	0	0	0	4	1	4	2	3	0	1	2	0	0	0	1	0	0	0	0	1	2	0	0	0
622	北京	3	0	0	0	0	0	4	1	1	1	1	1	1	1	1	2	5	5	5	5	5	2	2	0	0	0	0	1	1	2	0	0	0	2	0	0	0	0	1	2	0	0	0	2	0	0	0	0
624	北京	2	5	0	0	0	0	4	1	1	2	4	3	4	1	2	2	5	4	5	4	4	2	8 不知道要注射00000000000000000000000000000000000000000000000	6	0	0	0	2	1	2	3	0	0	4	0	0	0	0	2	0	0	0	0	1	0	0	0	0
625	北京	3	0	0	0	0	0	3	1	1	1	5	5	5	1	1	2	1	5	5	5	5	2	8 不知道00000000000000000000000000000000000000000000000000000	0	0	0	0	2	1	0	0	0	0	4	0	0	0	0	1	0	0	0	0	2	0	0	0	0
626	北京	1	3	0	0	0	0	4	2	2	4	1	2	1	1	1	2	5	5	5	5	5	2	8 身体上的不是00000000000000000000000000000000000000000000000	0	0	0	0	3	1	4	3	0	0	5 没听说00000000	0	0	0	0	1	3	0	0	0	1	3	0	0	0
628	北京	3	0	0	0	0	0	3	2	2	3	4	1	1	2	1	2	5	5	3	5	4	1	0	0	0	0	0	1	1	0	0	0	0	1	2	0	0	0	1	2	0	0	0	1	2	0	0	0
630	北京	3	0	0	0	0	0	4	1	1	3	1	5	3	1	1	2	2	4	5	5	3	1	0	0	0	0	0	1	1	2	0	0	0	1	0	0	0	0	1	0	0	0	0	1	0	0	0	0
631	北京	2	4	2	2	2	2	6	3	6	3	3	2	2	1	1	2	5	4	5	5	4	1	0	0	0	0	0	3	1	0	0	0	0	1	0	0	0	0	1	0	0	0	0	1	0	0	0	0
632	北京	2	3	0	0	0	0	4	3	4	4	3	2	2	1	1	2	4	5	5	4	4	2	2	0	0	0	0	3	3	1	0	0	0	1	0	0	0	0	1	0	0	0	0	1	0	0	0	0
635	北京	3	0	0	0	0	0	5	1	1	1	1	1	2	1	2	2	4	1	5	4	5	2	2	0	0	0	0	4	3	1	4	0	0	3	4	0	0	0	3	4	0	0	0	3	2	1	0	0
638	北京	3	0	0	0	0	0	5	1	1	1	1	1	1	1	1	2	5	4	1	5	5	2	8 没时间去000000000000000000000000000000000000000000000000000	0	0	0	0	3	4	5 网络上0000	0	0	0	5 医院0000000000	0	0	0	0	1	0	0	0	0	1	0	0	0	0
639	北京	1	4	2	2	1	1	4	2	2	3	3	2	2	1	1	2	4	4	5	5	4	2	8 不知道00000000000000000000000000000000000000000000000000000	0	0	0	0	1	1	0	0	0	0	1	0	0	0	0	1	0	0	0	0	1	0	0	0	0
640	北京	3	0	0	0	0	0	4	2	2	1	1	1	1	1	1	2	5	5	5	5	4	2	2	0	0	0	0	4	1	2	3	4	0	1	2	3	4	0	1	2	3	0	0	1	2	0	0	0
642	北京	3	0	0	0	0	0	5	1	1	1	1	1	1	1	1	2	5	5	1	5	5	2	2	0	0	0	0	3	4	0	0	0	0	2	0	0	0	0	6	0	0	0	0	2	0	0	0	0
643	北京	2	3	0	0	0	0	5	1	1	1	1	1	1	1	1	2	5	5	5	5	5	2	2	0	0	0	0	4	1	4	0	0	0	4	0	0	0	0	1	2	0	0	0	1	2	0	0	0
644	北京	3	0	0	0	0	0	6	1	2	2	1	6	2	1	1	2	5	5	5	5	5	2	2	0	0	0	0	3	1	2	0	0	0	1	0	0	0	0	1	0	0	0	0	2	0	0	0	0
645	北京	3	0	0	0	0	0	4	1	2	1	3	1	1	1	1	2	5	5	5	5	4	2	8 没有必要000000000000000000000000000000000000000000000000000	0	0	0	0	3	1	0	0	0	0	2	0	0	0	0	1	0	0	0	0	2	0	0	0	0
646	北京	2	3	0	0	0	0	5	1	1	1	1	1	1	1	1	2	5	5	5	5	5	2	8	0	0	0	0	4	1	2	0	0	0	1	0	0	0	0	1	5 网站0000	0	0	0	1	0	0	0	0
649	北京	2	4	2	2	2	2	1	3	3	5	5	3	3	1	1	2	5	5	5	5	5	2	4	0	0	0	0	4	5 公司信自0000000000000	1	2	0	0	5 公司0000000000	1	2	0	0	1	2	0	0	0	1	0	0	0	0
650	北京	1	3	0	0	0	0	4	1	1	1	1	1	2	2	2	2	4	2	2	4	3	2	1	6	8 价格不清楚	0	0	4	1	2	0	0	0	5 xiu xhd0000000	0	0	0	0	1	2	0	0	0	1	0	0	0	0
652	北京	3	0	0	0	0	0	3	2	2	2	4	4	3	1	2	2	1	5	1	5	5	2	8 没这方面意识00000000000000000000000000000000000000000000000	0	0	0	0	3	1	0	0	0	0	1	0	0	0	0	1	0	0	0	0	2	0	0	0	0
654	北京	1	3	0	0	0	0	5	1	1	1	1	1	1	1	1	2	5	5	5	5	5	1	0	0	0	0	0	3	2	1	4	3	0	1	3	0	0	0	1	0	0	0	0	1	0	0	0	0
656	北京	1	1	0	0	0	0	3	3	3	1	3	4	5	1	1	2	4	4	4	5	4	2	2	0	0	0	0	3	4	0	0	0	0	4	0	0	0	0	1	0	0	0	0	1	0	0	0	0
658	北京	3	0	0	0	0	0	5	1	1	1	1	1	1	1	1	2	5	5	5	5	5	2	8 用户心脏不好所以没有注射00000000000000000000000000000000000	0	0	0	0	4	4	2	1	0	0	1	0	0	0	0	1	0	0	0	0	1	0	0	0	0
659	北京	1	4	2	1	1	2	2	3	5	5	5	5	5	1	1	2	5	5	5	5	1	2	5	0	0	0	0	4	1	0	0	0	0	4	0	0	0	0	1	0	0	0	0	1	0	0	0	0
663	北京	3	0	0	0	0	0	2	3	2	5	2	3	3	1	2	2	4	5	5	5	5	1	0	0	0	0	0	2	1	0	0	0	0	1	0	0	0	0	1	0	0	0	0	1	0	0	0	0
664	北京	3	0	0	0	0	0	5	4	3	2	2	1	1	1	1	2	5	4	4	5	4	2	2	0	0	0	0	3	2	0	0	0	0	2	0	0	0	0	2	0	0	0	0	5 医生000000000000	0	0	0	0
665	北京	1	4	2	2	1	1	5	1	1	5	5	3	3	1	1	2	5	5	5	5	5	2	2	0	0	0	0	4	4	0	0	0	0	2	0	0	0	0	1	0	0	0	0	1	0	0	0	0
666	北京	3	0	0	0	0	0	5	1	1	1	6	1	6	2	2	2	5	5	5	5	5	2	4	0	0	0	0	4	3	0	0	0	0	2	0	0	0	0	1	0	0	0	0	6	0	0	0	0
668	北京	1	3	0	0	0	0	3	5	3	5	4	4	4	2	1	2	5	3	5	5	5	1	0	0	0	0	0	1	1	0	0	0	0	2	0	0	0	0	1	0	0	0	0	1	0	0	0	0
669	北京	3	0	0	0	0	0	3	3	3	1	3	3	1	1	1	2	5	5	5	3	5	1	0	0	0	0	0	3	3	1	2	0	0	4	3	2	1	0	3	0	0	0	0	2	0	0	0	0
671	北京	2	6 不知道00000000	0	0	0	0	5	1	1	1	1	1	1	1	1	2	2	5	5	5	5	2	8	0	0	0	0	1	1	0	0	0	0	2	0	0	0	0	1	0	0	0	0	2	0	0	0	0
672	北京	3	0	0	0	0	0	3	2	2	1	1	3	2	1	1	2	3	4	5	5	4	2	8 没有考虑000000000000000000000000000000000000000000000000000	0	0	0	0	3	1	0	0	0	0	3	2	0	0	0	1	0	0	0	0	2	0	0	0	0
673	北京	3	0	0	0	0	0	5	1	1	3	1	1	1	1	1	2	5	5	5	5	5	2	2	0	0	0	0	3	4	0	0	0	0	4	0	0	0	0	4	0	0	0	0	2	0	0	0	0
675	北京	1	4	2	1	1	1	2	2	5	1	1	1	1	1	2	2	4	5	5	4	4	2	2	0	0	0	0	3	1	2	3	0	0	1	2	0	0	0	2	0	0	0	0	2	0	0	0	0
676	北京	1	4	2	1	1	1	4	2	3	1	1	4	3	1	1	2	5	5	5	5	5	2	2	0	0	0	0	4	1	3	0	0	0	1	0	0	0	0	1	0	0	0	0	1	2	0	0	0
677	北京	1	4	2	2	1	1	3	3	3	3	3	1	1	1	1	2	4	4	2	5	1	1	0	0	0	0	0	2	1	2	3	4	0	1	0	0	0	0	1	2	0	0	0	1	0	0	0	0
678	北京	3	0	0	0	0	0	5	2	6	1	1	1	2	1	1	2	5	5	4	5	4	2	8 没时间00000000000000000000000000000000000000000000000000000	0	0	0	0	4	4	0	0	0	0	5 医院0000000000	0	0	0	0	5 自己亲眼看到的最可信	0	0	0	0	1	0	0	0	0
680	北京	3	0	0	0	0	0	5	3	2	3	5	5	4	1	1	2	4	5	5	5	3	2	8 没有重视。0000000000000000000000000000000000000000000000000	0	0	0	0	3	4	0	0	0	0	4	0	0	0	0	1	0	0	0	0	2	0	0	0	0
681	北京	1	4	2	2	1	1	4	2	2	1	1	1	1	1	1	2	5	5	5	5	5	2	2	0	0	0	0	3	1	0	0	0	0	1	0	0	0	0	1	0	0	0	0	1	0	0	0	0
682	北京	3	0	0	0	0	0	6	1	6	1	1	1	1	1	1	2	5	5	5	5	5	2	8 没有时间000000000000000000000000000000000000000000000000000	0	0	0	0	3	1	2	0	0	0	1	2	0	0	0	1	0	0	0	0	1	0	0	0	0
684	北京	2	1	0	0	0	0	4	1	5	5	5	5	5	1	1	2	5	5	5	5	5	2	8 没听说00000000000000000000000000000000000000000000000000000	0	0	0	0	4	4	0	0	0	0	1	0	0	0	0	1	0	0	0	0	1	0	0	0	0
689	北京	2	3	0	0	0	0	3	1	3	1	1	1	1	2	2	2	5	5	5	5	1	2	8 没有感冒000000000000000000000000000000000000000000000000000	0	0	0	0	4	1	0	0	0	0	5 药店0000000000	0	0	0	0	1	0	0	0	0	5 防疫站0000000000	0	0	0	0
690	北京	3	0	0	0	0	0	3	1	2	5	5	5	4	1	1	2	5	5	4	5	5	1	0	0	0	0	0	2	1	2	0	0	0	4	1	0	0	0	1	0	0	0	0	1	0	0	0	0
695	北京	3	0	0	0	0	0	4	5	5	3	3	5	5	1	1	2	3	5	5	5	5	2	8 没时间 无所谓0000000000000000000000000000000000000000000000	0	0	0	0	4	1	2	3	0	0	4	2	0	0	0	3	0	0	0	0	2	0	0	0	0
698	北京	3	0	0	0	0	0	4	2	2	1	2	2	2	1	1	2	5	5	5	5	5	2	2	0	0	0	0	3	1	0	0	0	0	1	0	0	0	0	6	0	0	0	0	6	0	0	0	0
699	北京	3	0	0	0	0	0	4	3	3	1	3	1	1	1	1	2	5	5	5	5	5	2	8 那天正好发烧00000000000000000000000000000000000000000000000	0	0	0	0	3	5 电视，广播，网络00000	0	0	0	0	4	0	0	0	0	5 新闻0000000000000000	0	0	0	0	1	0	0	0	0
700	北京	2	3	0	0	0	0	5	5	1	2	5	5	3	1	1	2	4	5	3	5	3	1	0	0	0	0	0	2	1	0	0	0	0	1	0	0	0	0	1	0	0	0	0	1	0	0	0	0
702	北京	2	3	0	0	0	0	4	2	4	2	1	1	1	1	1	2	3	2	4	2	2	2	2	0	0	0	0	3	1	0	0	0	0	2	0	0	0	0	1	2	0	0	0	1	2	0	0	0
706	北京	3	0	0	0	0	0	2	5	1	5	5	1	1	2	2	2	1	5	5	5	5	2	6	8 不知道00000000000000000000	0	0	0	4	1	4	0	0	0	4	0	0	0	0	1	0	0	0	0	1	0	0	0	0
709	北京	3	0	0	0	0	0	5	1	1	1	1	1	1	1	1	2	5	5	5	5	5	2	2	0	0	0	0	4	3	0	0	0	0	1	0	0	0	0	6	0	0	0	0	6	0	0	0	0
710	北京	3	0	0	0	0	0	4	3	3	1	1	1	1	1	1	2	5	5	5	5	5	1	0	0	0	0	0	3	1	0	0	0	0	1	0	0	0	0	2	0	0	0	0	2	0	0	0	0
711	北京	1	3	0	0	0	0	5	1	1	1	1	1	1	1	1	1	5	5	5	5	5	1	0	0	0	0	0	3	3	1	2	0	0	1	0	0	0	0	1	5 网络0000	0	0	0	5 医疗机构00000000	0	0	0	0
713	北京	3	0	0	0	0	0	5	1	1	1	1	1	1	1	1	2	5	5	5	5	5	2	2	0	0	0	0	4	4	1	2	0	0	1	2	0	0	0	1	2	0	0	0	1	2	0	0	0
714	北京	1	1	0	0	0	0	5	1	1	1	1	2	2	1	1	2	5	5	5	5	4	2	8 治疗几率太小00000000000000000000000000000000000000000000000	0	0	0	0	3	1	2	0	0	0	2	1	0	0	0	1	2	0	0	0	2	5 国家医院00	0	0	0
715	北京	3	0	0	0	0	0	5	1	1	1	1	1	1	1	1	2	5	5	5	5	5	2	2	0	0	0	0	4	4	0	0	0	0	4	0	0	0	0	1	0	0	0	0	2	0	0	0	0
718	北京	1	4	2	1	1	1	5	1	3	5	5	3	5	1	1	2	5	5	5	5	5	2	2	0	0	0	0	4	1	0	0	0	0	1	0	0	0	0	1	0	0	0	0	1	0	0	0	0
721	北京	3	0	0	0	0	0	4	1	1	1	1	1	1	1	1	2	5	5	1	5	5	2	2	0	0	0	0	1	1	0	0	0	0	2	0	0	0	0	1	0	0	0	0	2	0	0	0	0
723	北京	3	0	0	0	0	0	3	1	1	1	5	1	1	1	1	2	5	5	5	5	5	2	2	0	0	0	0	4	4	3	0	0	0	4	0	0	0	0	3	0	0	0	0	2	0	0	0	0
724	北京	1	3	0	0	0	0	3	4	5	1	1	5	5	1	1	2	5	3	5	5	5	2	2	0	0	0	0	1	1	0	0	0	0	1	2	0	0	0	1	0	0	0	0	1	0	0	0	0
726	北京	2	3	0	0	0	0	5	1	1	1	3	2	3	1	1	2	4	4	4	5	4	2	2	0	0	0	0	3	2	0	0	0	0	4	0	0	0	0	1	2	0	0	0	2	0	0	0	0
727	北京	1	4	2	1	1	2	1	5	5	5	5	5	5	1	1	2	4	5	5	5	4	1	0	0	0	0	0	2	2	3	0	0	0	1	0	0	0	0	1	0	0	0	0	2	1	0	0	0
728	北京	2	3	0	0	0	0	2	2	2	1	1	1	2	1	1	2	5	5	2	5	5	2	8 没时间00000000000000000000000000000000000000000000000000000	0	0	0	0	1	4	1	0	0	0	4	0	0	0	0	1	0	0	0	0	5 医院000000000000	0	0	0	0
732	北京	3	0	0	0	0	0	3	1	2	1	1	1	1	1	1	2	5	2	5	5	5	1	0	0	0	0	0	4	1	0	0	0	0	1	0	0	0	0	5 不知道00000000000000	0	0	0	0	1	0	0	0	0
735	北京	2	1	0	0	0	0	5	3	3	4	1	1	2	1	2	2	3	5	5	4	5	2	8 不了解。000000000000000000000000000000000000000000000000000	7	0	0	0	4	3	0	0	0	0	3	0	0	0	0	1	2	0	0	0	1	2	0	0	0
737	北京	3	0	0	0	0	0	5	1	1	2	5	5	3	1	1	2	5	5	5	5	5	2	2	0	0	0	0	2	1	0	0	0	0	1	2	0	0	0	1	0	0	0	0	1	0	0	0	0
740	北京	2	1	0	0	0	0	4	1	1	1	1	1	1	1	1	2	5	5	5	5	5	2	8 不知道00000000000000000000000000000000000000000000000000000	0	0	0	0	4	5 新闻00000000000000000	0	0	0	0	5 新闻0000000000	0	0	0	0	1	0	0	0	0	1	0	0	0	0
741	北京	2	4	2	2	1	2	2	2	2	1	1	1	1	1	1	2	5	5	5	5	5	1	0	0	0	0	0	3	1	0	0	0	0	3	1	0	0	0	2	0	0	0	0	1	0	0	0	0
742	北京	3	0	0	0	0	0	5	3	3	5	3	4	3	1	1	2	1	5	4	5	5	2	2	0	0	0	0	3	1	2	0	0	0	1	2	0	0	0	1	2	0	0	0	1	2	0	0	0
746	北京	3	0	0	0	0	0	3	3	3	3	5	5	3	1	1	2	5	5	5	5	5	2	6	0	0	0	0	1	1	2	0	0	0	1	2	0	0	0	1	0	0	0	0	1	0	0	0	0
751	北京	2	3	0	0	0	0	4	2	2	1	4	3	1	1	1	2	5	5	5	4	2	1	0	0	0	0	0	4	1	0	0	0	0	1	0	0	0	0	1	0	0	0	0	2	0	0	0	0
752	北京	1	4	2	2	2	1	5	1	1	1	1	1	1	1	1	2	5	5	5	5	5	2	8 年龄不需要0000000000000000000000000000000000000000000000000	2	0	0	0	4	5 单位00000000000000000	2	0	0	0	5 本人就是医生00	0	0	0	0	1	2	0	0	0	5 培训000000000000	0	0	0	0
756	北京	3	0	0	0	0	0	6	1	1	1	5	5	5	1	1	2	1	5	5	5	5	2	1	0	0	0	0	4	4	2	1	0	0	5 医院0000000000	0	0	0	0	2	0	0	0	0	5 医院000000000000	0	0	0	0
759	北京	3	0	0	0	0	0	2	2	2	1	2	2	3	1	1	2	4	5	5	4	4	1	0	0	0	0	0	3	2	0	0	0	0	4	0	0	0	0	1	0	0	0	0	2	0	0	0	0
760	北京	2	1	0	0	0	0	5	1	1	5	1	1	5	1	1	2	5	5	5	5	5	2	6	0	0	0	0	3	3	1	0	0	0	2	0	0	0	0	2	0	0	0	0	2	0	0	0	0
767	北京	1	3	0	0	0	0	4	3	3	1	1	1	3	1	1	2	5	5	5	5	5	2	2	0	0	0	0	3	1	0	0	0	0	2	0	0	0	0	1	0	0	0	0	2	0	0	0	0
768	北京	3	0	0	0	0	0	5	1	1	1	1	1	1	1	1	2	5	5	5	5	5	1	0	0	0	0	0	2	1	2	3	4	0	4	3	2	1	0	1	0	0	0	0	2	0	0	0	0
770	北京	3	0	0	0	0	0	5	1	2	1	2	1	1	1	1	2	4	5	4	5	4	2	2	0	0	0	0	3	1	3	0	0	0	5 不关心00000000	0	0	0	0	6	0	0	0	0	1	0	0	0	0
771	北京	2	3	0	0	0	0	3	3	2	1	1	1	2	1	1	2	3	4	4	4	3	2	6	0	0	0	0	2	1	0	0	0	0	4	0	0	0	0	1	0	0	0	0	2	0	0	0	0
773	北京	3	0	0	0	0	0	4	1	1	1	1	1	2	1	1	2	5	5	5	3	4	1	0	0	0	0	0	3	1	2	0	0	0	1	2	0	0	0	1	2	0	0	0	1	0	0	0	0
774	北京	2	6 不知道00000000	0	0	0	0	6	1	1	1	5	3	3	2	2	2	5	5	5	5	5	2	6	0	0	0	0	4	1	0	0	0	0	2	1	0	0	0	1	0	0	0	0	1	0	0	0	0
775	北京	2	4	2	2	1	2	3	1	2	1	5	3	3	1	1	2	4	4	4	4	2	2	8 想要宝宝 不够了解00000000000000000000000000000000000000000	0	0	0	0	3	3	0	0	0	0	3	0	0	0	0	1	0	0	0	0	1	0	0	0	0
776	北京	2	1	0	0	0	0	5	1	2	3	5	5	1	2	1	2	5	5	5	5	1	1	0	0	0	0	0	3	1	4	5 广播	0	0	5 社区0000000000	0	0	0	0	1	0	0	0	0	1	0	0	0	0
778	北京	2	2	0	0	0	0	2	2	2	2	3	3	4	1	1	2	5	4	5	5	5	2	2	6	8 费用000000	0	0	3	1	4	3	0	0	3	2	0	0	0	3	0	0	0	0	2	0	0	0	0
779	北京	3	0	0	0	0	0	3	1	1	1	5	5	3	2	2	2	4	5	5	5	1	2	8 不知道00000000000000000000000000000000000000000000000000000	0	0	0	0	1	4	0	0	0	0	4	0	0	0	0	1	0	0	0	0	1	0	0	0	0
780	北京	1	4	2	2	2	2	2	2	2	5	1	1	1	1	1	2	1	5	5	5	5	2	2	0	0	0	0	4	1	2	0	0	0	1	2	0	0	0	1	2	0	0	0	4	2	1	0	0
781	北京	2	3	0	0	0	0	5	1	1	1	1	1	1	1	2	2	5	2	5	5	5	2	2	0	0	0	0	1	1	2	3	0	0	1	2	0	0	0	1	0	0	0	0	2	0	0	0	0
782	北京	1	4	2	1	2	2	2	1	5	3	3	4	2	1	2	2	5	5	5	5	5	2	8 感冒少00000000000000000000000000000000000000000000000000000	0	0	0	0	4	5 电视，报纸00000000000	0	0	0	0	5 报纸0000000000	0	0	0	0	1	0	0	0	0	1	0	0	0	0
783	北京	3	0	0	0	0	0	4	3	3	5	2	4	3	1	1	2	5	5	4	5	5	2	4	0	0	0	0	2	1	2	5 网络	0	0	2	0	0	0	0	6	0	0	0	0	1	2	0	0	0
784	北京	2	3	0	0	0	0	2	1	1	1	1	1	2	1	1	2	3	5	4	5	5	2	2	0	0	0	0	1	1	0	0	0	0	1	0	0	0	0	1	0	0	0	0	1	0	0	0	0
785	北京	1	3	0	0	0	0	4	3	3	5	5	5	2	1	1	2	5	5	3	5	5	2	4	8 疫苗制后000000000000000000	0	0	0	4	3	1	0	0	0	2	0	0	0	0	1	2	0	0	0	2	5 正规的医院	0	0	0
789	北京	3	0	0	0	0	0	5	1	2	1	1	1	1	1	1	2	5	5	5	5	5	2	2	0	0	0	0	3	1	2	0	0	0	2	1	3	0	0	1	2	0	0	0	2	1	0	0	0
791	北京	2	3	0	0	0	0	6	3	3	2	3	4	3	1	1	2	4	4	4	5	5	2	8 没有通知打。00000000000000000000000000000000000000000000000	0	0	0	0	3	4	0	0	0	0	1	0	0	0	0	1	0	0	0	0	2	0	0	0	0
793	北京	1	3	0	0	0	0	4	3	5	5	3	2	3	1	1	2	5	5	5	5	5	1	0	0	0	0	0	3	1	2	0	0	0	1	2	0	0	0	1	2	0	0	0	1	2	0	0	0
794	北京	3	0	0	0	0	0	5	1	1	1	1	1	1	1	1	2	5	5	5	5	5	2	2	0	0	0	0	3	1	0	0	0	0	1	0	0	0	0	1	0	0	0	0	1	0	0	0	0
795	北京	3	0	0	0	0	0	3	2	4	5	2	1	1	1	1	2	5	5	5	5	5	1	0	0	0	0	0	1	3	0	0	0	0	5 小区0000000000	0	0	0	0	3	0	0	0	0	5 小区000000000000	0	0	0	0
797	北京	1	3	0	0	0	0	3	2	2	1	2	3	1	1	1	2	5	2	4	3	2	1	0	0	0	0	0	1	2	0	0	0	0	2	0	0	0	0	2	0	0	0	0	2	0	0	0	0
798	北京	3	0	0	0	0	0	5	1	1	1	1	1	1	1	1	2	3	5	5	5	5	2	8 没有0000000000000000000000000000000000000000000000000000000	0	0	0	0	3	4	3	0	0	0	3	4	0	0	0	1	3	0	0	0	1	3	0	0	0
799	北京	3	0	0	0	0	0	3	2	3	1	1	1	1	2	1	2	5	1	4	4	5	2	8 晕针0000000000000000000000000000000000000000000000000000000	0	0	0	0	1	4	0	0	0	0	4	0	0	0	0	1	0	0	0	0	2	0	0	0	0
800	北京	2	4	2	1	1	1	3	3	4	3	5	5	4	1	1	2	5	5	4	5	5	2	2	0	0	0	0	1	1	0	0	0	0	4	0	0	0	0	1	0	0	0	0	4	0	0	0	0
801	北京	1	1	0	0	0	0	6	4	2	1	3	1	1	1	1	2	5	5	5	5	2	2	1	0	0	0	0	1	1	0	0	0	0	1	0	0	0	0	1	0	0	0	0	2	0	0	0	0
803	北京	3	0	0	0	0	0	5	2	2	2	3	5	1	1	1	2	5	5	5	5	5	2	2	0	0	0	0	3	1	0	0	0	0	1	0	0	0	0	1	0	0	0	0	1	0	0	0	0
804	北京	1	1	0	0	0	0	5	1	1	1	1	1	1	1	1	2	5	5	5	5	4	2	2	0	0	0	0	3	1	4	0	0	0	1	0	0	0	0	1	0	0	0	0	1	0	0	0	0
811	北京	2	3	0	0	0	0	5	2	2	1	4	3	2	1	1	2	2	5	5	5	5	2	4	0	0	0	0	4	1	0	0	0	0	1	0	0	0	0	1	0	0	0	0	1	0	0	0	0
812	北京	3	0	0	0	0	0	3	1	2	4	3	2	3	1	1	2	4	5	4	3	5	1	0	0	0	0	0	3	1	0	0	0	0	2	0	0	0	0	4	0	0	0	0	2	0	0	0	0
813	北京	3	0	0	0	0	0	5	2	3	2	3	2	2	1	1	2	4	4	3	5	5	2	6	8 工作忙没时间00000000000000	0	0	0	3	1	0	0	0	0	2	0	0	0	0	1	0	0	0	0	2	0	0	0	0
814	北京	2	3	0	0	0	0	5	2	2	1	1	2	1	1	1	2	5	5	5	5	5	1	0	0	0	0	0	1	1	0	0	0	0	1	0	0	0	0	1	0	0	0	0	1	0	0	0	0
815	北京	3	0	0	0	0	0	4	1	1	1	1	1	1	2	1	2	5	5	5	5	5	2	2	0	0	0	0	3	1	0	0	0	0	1	0	0	0	0	1	0	0	0	0	1	0	0	0	0
816	北京	3	0	0	0	0	0	3	1	1	1	2	4	1	1	1	2	5	5	5	4	5	2	8 过敏0000000000000000000000000000000000000000000000000000000	3	0	0	0	3	1	2	3	0	0	4	0	0	0	0	1	2	0	0	0	2	4	0	0	0
817	北京	3	0	0	0	0	0	3	1	1	1	1	5	1	1	1	2	5	5	5	3	3	1	0	0	0	0	0	4	1	2	3	4	0	4	3	0	0	0	2	0	0	0	0	2	0	0	0	0
818	北京	3	0	0	0	0	0	3	2	1	2	6	5	1	2	2	2	2	4	5	5	5	2	8 不知道00000000000000000000000000000000000000000000000000000	0	0	0	0	4	3	4	0	0	0	2	0	0	0	0	1	0	0	0	0	2	0	0	0	0
819	北京	3	0	0	0	0	0	5	4	3	2	2	2	2	1	1	2	5	5	4	4	4	1	0	0	0	0	0	3	1	2	0	0	0	1	2	0	0	0	1	0	0	0	0	1	2	0	0	0
821	北京	3	0	0	0	0	0	3	2	2	3	2	2	1	1	1	2	5	5	5	5	5	1	0	0	0	0	0	3	3	0	0	0	0	1	2	0	0	0	1	0	0	0	0	1	0	0	0	0
822	北京	3	0	0	0	0	0	5	2	2	1	5	4	5	1	1	2	5	3	3	5	5	2	7	0	0	0	0	2	4	0	0	0	0	4	0	0	0	0	6	0	0	0	0	6	0	0	0	0
823	北京	3	0	0	0	0	0	4	1	3	1	2	3	3	1	1	2	5	4	1	4	3	2	2	0	0	0	0	3	1	2	3	0	0	4	0	0	0	0	1	2	0	0	0	1	0	0	0	0
825	北京	3	0	0	0	0	0	4	2	2	1	1	4	5	2	2	2	1	1	5	5	4	2	8 不了解情况0000000000000000000000000000000000000000000000000	0	0	0	0	3	5 网上00000000000000000	0	0	0	0	3	0	0	0	0	6	0	0	0	0	3	0	0	0	0
826	北京	2	3	0	0	0	0	5	1	1	1	1	2	5	1	2	2	4	5	5	4	3	2	6	0	0	0	0	1	4	0	0	0	0	4	0	0	0	0	1	0	0	0	0	1	0	0	0	0
827	北京	1	2	0	0	0	0	4	2	2	1	1	2	2	2	1	2	5	5	5	5	3	2	8 没意识00000000000000000000000000000000000000000000000000000	0	0	0	0	1	3	4	0	0	0	3	4	0	0	0	2	0	0	0	0	2	0	0	0	0
832	北京	2	3	0	0	0	0	5	1	2	1	1	1	1	1	1	2	5	5	3	5	5	2	2	0	0	0	0	3	1	2	0	0	0	1	2	3	4	0	1	2	0	0	0	1	2	0	0	0
833	北京	3	0	0	0	0	0	5	1	2	1	1	1	1	1	1	2	4	5	5	5	3	2	2	0	0	0	0	3	1	2	0	0	0	1	0	0	0	0	1	0	0	0	0	1	0	0	0	0
834	北京	3	0	0	0	0	0	3	3	3	3	3	3	3	1	1	2	3	4	4	5	4	1	0	0	0	0	0	3	1	0	0	0	0	1	0	0	0	0	1	0	0	0	0	1	0	0	0	0
835	北京	2	1	0	0	0	0	5	2	2	1	1	2	3	1	1	2	5	5	2	5	4	2	5	0	0	0	0	3	1	2	0	0	0	1	2	0	0	0	1	0	0	0	0	1	0	0	0	0
837	北京	3	0	0	0	0	0	1	3	3	3	3	3	3	1	1	2	5	5	5	5	5	2	4	0	0	0	0	3	4	0	0	0	0	1	0	0	0	0	4	0	0	0	0	1	0	0	0	0
838	北京	2	1	0	0	0	0	2	2	3	1	1	2	2	1	1	2	4	5	5	5	4	2	8 年龄没有必要 没有组织0000000000000000000000000000000000000	0	0	0	0	4	5 报纸00000000000000000	3	0	0	0	5 报纸0000000000	3	0	0	0	3	0	0	0	0	5 报纸000000000000	0	0	0	0
839	北京	2	3	0	0	0	0	1	2	3	1	1	5	5	1	1	2	5	5	5	3	5	1	0	0	0	0	0	1	4	1	2	3	0	2	0	0	0	0	2	0	0	0	0	2	0	0	0	0
840	北京	2	4	1	1	1	1	2	1	1	2	1	1	1	1	1	2	1	5	5	5	5	2	2	0	0	0	0	3	3	1	2	0	0	1	2	0	0	0	1	2	0	0	0	1	2	0	0	0
841	北京	1	1	0	0	0	0	2	1	1	1	1	1	1	1	1	2	4	5	5	5	4	2	8 觉得太麻烦。00000000000000000000000000000000000000000000000	0	0	0	0	4	1	0	0	0	0	1	0	0	0	0	1	0	0	0	0	1	0	0	0	0
843	北京	3	0	0	0	0	0	2	1	1	1	2	1	1	2	1	2	2	5	5	5	5	2	2	0	0	0	0	3	1	5 官方网站00	0	0	0	3	1	0	0	0	1	5 官方网站	0	0	0	2	0	0	0	0
844	北京	3	0	0	0	0	0	5	1	1	1	1	5	5	1	1	2	5	5	5	5	1	2	2	0	0	0	0	3	4	0	0	0	0	1	0	0	0	0	1	0	0	0	0	1	2	0	0	0
845	北京	3	0	0	0	0	0	4	2	2	1	2	3	3	1	1	2	5	5	4	5	4	2	6	0	0	0	0	3	4	0	0	0	0	2	0	0	0	0	2	0	0	0	0	2	0	0	0	0
848	北京	1	3	0	0	0	0	4	3	4	1	2	2	2	1	1	2	4	5	1	5	5	2	8 没有这种意识00000000000000000000000000000000000000000000000	0	0	0	0	2	2	4	0	0	0	2	0	0	0	0	2	0	0	0	0	2	4	0	0	0
851	北京	2	3	0	0	0	0	4	3	3	5	2	1	1	1	1	2	5	5	5	5	5	2	8 没在国内000000000000000000000000000000000000000000000000000	0	0	0	0	4	4	0	0	0	0	5 媒体0000000000	0	0	0	0	1	0	0	0	0	1	0	0	0	0
852	北京	3	0	0	0	0	0	5	1	1	3	1	2	1	1	1	2	5	5	5	5	5	1	0	0	0	0	0	3	1	0	0	0	0	1	0	0	0	0	1	2	0	0	0	2	0	0	0	0
856	北京	1	4	2	1	1	1	3	1	1	1	1	1	1	1	1	2	5	5	2	5	5	2	8 自己接触的人比较少没有必要接种00000000000000000000000000000	0	0	0	0	3	1	0	0	0	0	1	0	0	0	0	1	0	0	0	0	2	0	0	0	0
857	北京	1	6 禽流感变异0000	0	0	0	0	5	2	3	2	5	3	2	1	1	2	5	5	5	5	5	2	8 没有发生这种情况的可能0000000000000000000000000000000000000	0	0	0	0	3	1	0	0	0	0	1	0	0	0	0	1	0	0	0	0	1	0	0	0	0
859	北京	2	4	2	1	1	2	3	1	1	1	5	5	1	1	1	2	5	5	5	5	5	2	5	0	0	0	0	4	3	0	0	0	0	2	0	0	0	0	1	0	0	0	0	1	0	0	0	0
860	北京	2	1	0	0	0	0	3	1	1	1	1	1	1	2	1	2	5	5	5	2	5	2	2	0	0	0	0	4	1	0	0	0	0	2	0	0	0	0	1	0	0	0	0	2	0	0	0	0
861	北京	3	0	0	0	0	0	3	2	1	2	1	1	1	1	1	2	3	5	1	4	5	2	2	0	0	0	0	3	2	0	0	0	0	2	0	0	0	0	2	0	0	0	0	2	0	0	0	0
862	北京	3	0	0	0	0	0	5	2	3	3	2	1	1	1	1	2	5	5	5	5	5	2	3	0	0	0	0	3	5 医院00000000000000000	0	0	0	0	2	0	0	0	0	1	0	0	0	0	2	0	0	0	0
864	北京	1	4	2	1	1	1	2	2	3	1	1	1	1	2	1	2	3	5	5	5	4	2	8 怀孕。00000000000000000000000000000000000000000000000000000	0	0	0	0	3	4	0	0	0	0	4	0	0	0	0	1	2	0	0	0	1	2	0	0	0
865	北京	2	4	2	1	1	1	4	2	2	3	2	5	4	1	2	2	4	4	3	4	5	2	7	2	0	0	0	3	5 广告00000000000000000	0	0	0	0	5 报纸 新闻000	0	0	0	0	1	0	0	0	0	1	2	0	0	0
866	北京	2	4	1	1	1	1	4	1	1	1	1	1	1	1	1	2	5	5	5	5	4	2	2	0	0	0	0	4	1	0	0	0	0	1	0	0	0	0	1	0	0	0	0	1	2	0	0	0
867	北京	2	3	0	0	0	0	5	2	2	2	1	1	3	1	1	2	5	5	4	5	1	2	2	0	0	0	0	4	1	2	5 报纸	3	0	3	1	2	0	0	1	0	0	0	0	1	0	0	0	0
870	北京	2	1	0	0	0	0	5	3	3	1	3	5	1	1	2	2	5	3	2	5	5	2	2	0	0	0	0	4	4	0	0	0	0	2	0	0	0	0	6	0	0	0	0	1	0	0	0	0
871	北京	3	0	0	0	0	0	5	1	1	3	1	1	1	1	2	2	5	5	5	5	3	2	8 不了解着方面情况0000000000000000000000000000000000000000000	0	0	0	0	4	1	3	5 网站	0	0	1	0	0	0	0	1	0	0	0	0	2	0	0	0	0
875	北京	3	0	0	0	0	0	5	1	1	1	1	1	1	1	2	2	5	5	5	5	5	1	0	0	0	0	0	1	5 电视00000000000000000	0	0	0	0	5 通知报纸000000	0	0	0	0	5 学校0000000000000000	0	0	0	0	5 学校000000000000	0	0	0	0
876	北京	2	1	0	0	0	0	3	2	2	3	3	3	4	1	1	2	3	5	4	5	5	2	8 接种疫苗的都是老年人000000000000000000000000000000000000000	0	0	0	0	4	4	1	2	0	0	4	0	0	0	0	2	0	0	0	0	2	0	0	0	0
878	北京	1	1	0	0	0	0	1	5	3	3	4	3	2	1	1	2	5	5	5	5	5	2	3	0	0	0	0	3	1	2	3	4	0	2	1	0	0	0	2	0	0	0	0	2	0	0	0	0
880	北京	2	1	0	0	0	0	4	1	1	1	1	1	1	1	1	2	5	5	5	5	5	2	7	0	0	0	0	3	1	0	0	0	0	1	0	0	0	0	1	0	0	0	0	1	0	0	0	0
881	北京	2	1	0	0	0	0	4	2	3	2	3	3	3	1	1	2	5	4	5	5	5	1	0	0	0	0	0	3	1	0	0	0	0	1	0	0	0	0	6	0	0	0	0	2	0	0	0	0
883	北京	2	3	0	0	0	0	3	2	2	5	3	3	3	1	1	2	4	5	5	4	4	2	2	0	0	0	0	2	3	1	0	0	0	1	3	0	0	0	1	0	0	0	0	1	2	0	0	0
884	北京	2	3	0	0	0	0	3	2	2	5	1	2	2	1	1	2	2	4	2	5	3	2	2	0	0	0	0	3	1	3	0	0	0	2	0	0	0	0	1	0	0	0	0	2	0	0	0	0
885	北京	2	3	0	0	0	0	1	4	4	4	4	4	3	1	1	2	5	4	5	5	5	2	2	0	0	0	0	1	4	0	0	0	0	2	0	0	0	0	1	0	0	0	0	1	0	0	0	0
887	北京	1	3	0	0	0	0	2	1	1	1	5	1	1	2	2	2	5	5	5	5	5	2	8 没意识00000000000000000000000000000000000000000000000000000	0	0	0	0	3	4	0	0	0	0	4	0	0	0	0	4	0	0	0	0	6	0	0	0	0
888	北京	3	0	0	0	0	0	4	3	3	2	3	2	3	1	2	2	2	5	3	5	3	1	0	0	0	0	0	1	1	0	0	0	0	5 单位0000000000	0	0	0	0	1	0	0	0	0	5 单位000000000000	0	0	0	0
891	北京	1	3	0	0	0	0	5	2	2	1	1	2	1	1	1	2	3	5	5	4	5	2	2	0	0	0	0	4	4	0	0	0	0	4	0	0	0	0	1	0	0	0	0	1	0	0	0	0
893	北京	1	4	1	1	1	1	4	2	2	5	4	4	4	1	1	2	5	4	3	5	5	2	8 没效果00000000000000000000000000000000000000000000000000000	0	0	0	0	3	1	2	0	0	0	1	0	0	0	0	1	0	0	0	0	1	0	0	0	0
898	北京	2	4	1	1	1	1	3	1	1	1	1	1	1	1	1	2	5	5	5	5	6	1	0	0	0	0	0	1	1	0	0	0	0	1	0	0	0	0	1	0	0	0	0	1	0	0	0	0
899	北京	2	1	0	0	0	0	5	1	5	5	5	3	3	2	2	2	5	5	5	5	5	2	8 没感冒00000000000000000000000000000000000000000000000000000	0	0	0	0	1	2	0	0	0	0	2	0	0	0	0	2	0	0	0	0	2	0	0	0	0
901	北京	2	4	2	1	1	1	5	1	1	1	1	1	1	1	1	2	5	5	5	5	5	2	2	0	0	0	0	3	1	3	4	0	0	4	1	0	0	0	1	0	0	0	0	2	0	0	0	0
902	北京	3	0	0	0	0	0	3	2	2	1	1	2	2	1	1	2	4	5	5	4	5	2	8 学校没有通知00000000000000000000000000000000000000000000000	2	0	0	0	3	1	2	0	0	0	1	2	0	0	0	1	2	0	0	0	1	2	0	0	0
904	北京	1	4	2	1	1	1	5	1	1	1	3	2	2	1	1	2	5	5	4	5	5	2	2	0	0	0	0	2	3	0	0	0	0	1	0	0	0	0	1	0	0	0	0	1	0	0	0	0
905	北京	3	0	0	0	0	0	3	2	2	1	3	5	5	1	1	2	1	5	5	5	1	2	8 注射之后就发烧000000000000000000000000000000000000000000000	0	0	0	0	1	1	2	0	0	0	2	1	0	0	0	6	0	0	0	0	6	0	0	0	0
906	北京	3	0	0	0	0	0	5	1	1	4	3	3	3	1	1	2	4	3	3	3	3	1	0	0	0	0	0	2	1	5 电视000000	0	0	0	1	0	0	0	0	1	5 媒体0000	0	0	0	1	0	0	0	0
907	北京	3	0	0	0	0	0	4	1	3	1	1	1	1	1	1	2	5	5	4	5	5	2	2	0	0	0	0	4	4	0	0	0	0	3	0	0	0	0	2	0	0	0	0	2	0	0	0	0
908	北京	2	4	2	1	1	2	5	1	1	1	1	1	1	1	2	2	5	5	5	5	5	2	5	8 没有时间去接种000000000000	0	0	0	3	1	2	0	0	0	1	0	0	0	0	1	0	0	0	0	1	0	0	0	0
909	北京	3	0	0	0	0	0	3	5	5	1	5	1	1	2	1	2	5	5	5	5	1	2	8 时间不方便0000000000000000000000000000000000000000000000000	0	0	0	0	4	4	0	0	0	0	4	3	0	0	0	4	0	0	0	0	4	0	0	0	0
911	北京	3	0	0	0	0	0	4	2	3	2	1	3	2	1	1	2	3	4	1	4	2	2	2	0	0	0	0	3	1	2	0	0	0	5 医生0000000000	0	0	0	0	2	0	0	0	0	2	0	0	0	0
[truncated: 32 more columns]
