# Supplementary material for: People at Risk of Influenza Pandemics: The Evolution of Perception and Behavior
Source: PLoS One. 2015 Dec 14;10(12):e0144868. doi: 10.1371/journal.pone.0144868 (PMC4682843; doi:10.1371/journal.pone.0144868)
Supplement: S5 File — (XLS) [file pone.0144868.s008.xls]

## Sheet: 甲流
N	FQ1	FQ2A	FQ2B	FQ2C	FQ2D	FQ2E	FQ3	FQ4	FQ5	FQ6	FQ7	FQ8	FQ9A	FQ9B	FQ9C	FQ9D	FQ9E	FQ9F	FQ10	FQ11A	FQ11B	FQ11C	FQ11D	FQ11E	FQ11F	FQ11G	FQ11H	FQ11I	FQ11J	FQ11K	FQ11L	FQ11M	FQ12	FQ12A	FQ12B	FQ12C	FQ12D	FQ12E	FQ12F	FQ12G	FQ13	FQ14	FQ15A	FQ15B	FQ15C	FQ15D	FQ16A	FQ16B	FQ16C
1	1	1	0	1	1	0	3	3	2	3	2	2	2	2	2	4	3	3	5	1	1	1	1	1	1	1	1	1	1	1	1	0	2	0	0	1	1	0	0	0	3	2					1	0	0
2	1	1	1	1	1	0	2	2	2	3	2	2	1	1	2	4	4	4	3	1	1	1	1	1	1	1	0	0	1	1	0	0	1								3	1					1	1	1
3	1	1	0	1	1	0	2	4	2	3	2	2	3	3	3	2	2	2	6	1	1	1	1	1	1	1	1	1	1	1	1	0	1								2	2					1	1	1
4	1	1	1	1	1	0	1	1	1	2	1	3	2	2	2	2	2	2	1	0	1	0	1	1	1	1	0	0	1	1	0	0	1								1	4	1	1	1	0
5	1	1	0	1	1	0	2	2	2	3	2	1	3	3	3	4	3	2	6	1	1	1	1	1	1	1	0	0	1	1	1	0	1								1	2					1	1	1
6	2	1	0	1	1	0	4	4	1	4	2	2	6	6	3	1	4	3	6	0	1	1	1	1	1	1	1	0	1	1	0	0	1								3	2					1	0	0
7	1	0	0	1	0	0	2	2	2	3	2	1	3	3	2	2	3	3	1	1	1	1	1	1	0	1	0	0	0	1	0	0	1								1	3	1	0	0	0
8	2	1	0	1	1	0	2	2	1	3	1	3	3	3	3	3	3	3	6	0	0	0	1	0	1	1	0	0	0	0	0	0	3								4	3	1	0	0	0
9	2	1	0	1	1	0	1	2	1	4	1	2	1	3	3	3	3	2	5	0	0	0	1	1	1	1	1	0	1	1	0	0	1								3	3	1	1	1	0
10	1	1	0	1	1	0	2	1	2	3	2	2	2	2	2	6	2	1	4	1	1	0	1	1	1	1	0	0	1	1	0	0	1								3	5
11	2	0	0	1	1	0	1	1	2	4	2	2	1	6	3	3	3	4	6	1	0	1	1	1	1	1	1	0	1	1	0	0	1								2	3	0	1	0	0
12	1	1	0	1	1	0	2	3	2	3	1	2	2	2	3	4	2	1	4	1	0	0	1	1	1	1	0	0	1	1	0	0	1								3	2					1	1	0
13	2	0	1	1	1	0	2	2	2	3	2	2	6	3	3	2	3	2	6	1	1	1	1	1	0	1	1	1	1	1	0	0	1								1	2					1	0	1
14	2	0	0	0	1	0	4	2	1	2	1	1	3	3	3	3	2	2	2	1	1	1	1	1	1	1	1	1	1	1	1	0	3								3	2					1	1	1
15	1	1	1	1	1	0	1	1	2	3	1	3	3	3	2	4	2	3	2	0	1	0	1	1	0	1	0	0	1	1	0	0	1								1	2					1	0	0
16	1	1	0	1	0	0	2	2	2	3	2	1	2	2	2	3	2	2	1	0	1	0	1	1	1	1	1	1	1	1	0	0	1								2	2					0	1	0
17	1	1	0	1	1	0	2	1	2	3	2	2	1	2	3	3	2	2	5	1	1	1	1	1	1	1	0	0	1	1	1	0	2	0	0	0	1	1	1	0	3	3	0	1	0	0
18	1	1	0	1	1	0	1	1	1	2	1	1	1	2	3	6	2	2	5	0	0	0	0	1	1	1	0	0	1	1	0	0	1								1	4	1	0	1	0
19	1	0	1	1	1	0	2	2	2	3	2	1	3	3	4	2	3	3	6	1	1	0	1	1	1	1	0	0	1	1	0	0	1								3	1					1	1	0
20	2	1	0	1	1	0	4	1	2	4	2	2	2	2	2	4	2	2	2	0	1	0	1	0	1	1	0	1	1	1	0	0	1								2	3	1	1	1	0
21	1	1	0	1	1	0	2	1	2	3	2	2	3	3	3	2	3	2	4	1	0	0	1	1	1	1	1	0	1	1	1	0	1								3	2					0	1	0
22	1	0	0	1	1	0	1	1	2	1	2	2	1	1	1	1	1	1	2	1	1	1	1	1	1	1	1	1	1	1	1	0	1								2	4	1	0	0	0
23	1	1	0	1	1	0	2	3	2	3	2	2	2	2	2	3	3	2	3	1	1	0	1	1	1	1	0	0	1	1	0	0	1								3	2					1	1	0
24	2	1	0	1	1	0	2	2	1	3	1	3	3	3	3	3	4	3	3	0	0	0	1	1	1	1	0	0	1	1	0	0	1								3	3	0	1	1	0
25	1	0	0	1	1	0	2	1	2	3	2	1	2	3	4	6	6	2	2	1	0	0	1	1	1	1	1	0	1	1	0	0	1								2	3	0	1	1	0
26	1	1	0	1	1	0	1	1	2	4	2	1	2	2	3	1	1	5	4	1	1	1	1	1	1	1	0	1	1	1	0	0	1								1	4	1	1	1	0
27	3	0	0	0	1	0	2	3	2	4	2	2	6	6	1	1	6	6	1	1	1	1	1	1	1	1	1	0	1	1	1	0	1								1	1					1	0	0
28	2	0	1	1	1	0	2	2	1	3	2	2	2	1	2	3	6	6	3	1	1	1	1	1	1	1	1	1	1	1	1	0	2	1	0	1	1	1	0	0	5	3	1	0	0	0
29	1	1	0	1	1	0	1	1	1	3	1	2	3	3	3	6	2	1	4	0	1	0	1	1	1	1	0	0	0	1	0	0	3								2	4	1	1	0	0
30	1	1	0	1	1	0	2	3	2	3	2	2	3	3	3	2	2	2	3	0	0	0	1	1	1	1	0	0	1	1	0	0	1								3	3	1	1	1	0
31	2	1	0	1	1	0	2	4	2	3	2	2	2	2	2	6	4	4	6	1	0	0	1	1	1	1	0	0	1	1	1	0	1								2	2					1	1	1
32	1	1	0	1	1	0	4	4	1	2	1	2	2	2	2	2	2	2	3	0	0	0	0	0	0	0	0	0	0	0	0	0	3								2	4	1	0	0	0
33	3	1	0	1	1	0	4	2	2	3	2	2	3	2	3	3	3	3	6	1	0	1	1	1	1	1	0	0	1	1	0	0	1								3	3	0	0	1	0
34	1	1	0	1	1	0	2	2	1	2	2	1	2	2	2	3	4	4	3	1	0	1	1	1	1	1	1	0	1	1	0	0	2	0	0	1	1	0	0	0	3	2					1	1	1
35	2	1	0	1	1	0	1	1	1	3	1	2	2	2	2	5	3	2	2	1	0	0	1	1	0	1	0	0	1	1	0	0	1								2	3	1	0	1	0
36	3	1	0	0	1	0	2	2	2	4	1	1	2	1	1	1	3	3	6	1	1	1	0	1	1	1	0	0	1	1	0	0	1								2	4	0	1	1	0
37	1	1	1	1	1	0	2	2	2	4	2	2	1	1	1	2	2	2	1	1	1	1	1	1	1	1	1	1	1	1	1	0	2	0	0	0	1	1	0	0	4	4	1	1	0	0
38	1	1	0	1	1	0	2	4	1	3	2	2	1	1	2	3	3	2	3	0	0	0	1	1	1	1	0	1	1	1	1	0	1								1	4	1	1	1	0
39	2	1	1	1	1	0	2	2	2	2	1	2	2	3	2	3	4	3	3	1	1	1	1	1	1	1	1	1	1	1	1	0	1								2	4	1	1	1	0
40	1	1	0	1	1	0	2	2	1	2	1	3	2	2	2	3	3	3	3	1	0	1	1	1	1	1	0	1	1	1	0	0	1								4	3					0	0	1
41	1	1	0	1	1	0	1	1	2	3	2	2	2	2	2	2	2	2	2	1	1	1	1	1	1	1	1	1	1	1	1	0	3								1	4	1	1	1	0
42	1	0	1	1	1	0	1	1	2	3	2	2	3	3	4	4	4	4	3	1	0	0	1	1	1	1	1	0	1	1	0	0	1								1	2					0	1	0
43	1	1	0	1	1	0	2	2	2	3	1	2	3	3	4	3	3	3	6	0	1	1	1	0	1	1	0	0	1	1	0	0	1								3	2					0	1	0
44	2	0	0	1	1	0	1	1	2	4	2	2	1	1	2	1	1	2	3	1	0	0	1	0	1	1	0	0	0	1	0	0	1								1	4	0	0	1	0
45	2	0	0	1	0	0	4	4	2	5	2	2	1	2	1	2	1	3	1	1	1	0	0	0	1	1	0	0	1	1	0	0	3								4	2					0	1	0
46	1	1	0	1	1	0	2	2	2	3	2	1	2	2	2	4	4	3	5	1	1	1	1	1	1	1	1	1	1	1	1	0	1								1	2					1	1	0
47	1	1	0	1	1	0	2	1	2	3	2	1	3	3	3	4	2	2	4	1	1	0	1	1	0	1	1	0	1	1	0	0	1								1	3	0	1	1	0
48	1	1	0	1	1	0	2	2	2	4	2	2	2	2	3	5	5	4	5	1	0	1	1	1	1	1	1	0	1	1	0	0	1								1	2					1	1	0
49	1	1	0	1	1	0	2	2	1	2	1	1	3	4	4	4	4	4	3	1	1	1	1	1	1	1	1	1	1	1	1	0	1								1	1					1	1	1
50	2	1	0	1	1	0	4	1	2	3	1	2	3	3	3	3	2	2	1	1	1	1	1	1	1	1	0	0	1	1	0	0	1								2	2					1	1	1
51	1	1	0	1	1	0	2	2	2	3	2	1	3	2	3	4	2	2	4	1	1	0	1	1	1	1	0	0	1	1	0	0	2	0	0	0	1	0	1	0	3	2					0	1	0
52	1	1	0	1	1	0	3	2	2	2	2	1	2	3	2	3	1	2	2	0	1	1	1	1	1	1	1	0	1	0	0	0	1								3	2					1	1	1
53	1	1	0	1	1	0	1	1	2	3	2	2	2	2	2	4	3	3	1	0	1	0	1	1	1	1	1	1	1	1	0	0	1								2	3	0	1	1	0
54	2	1	0	1	1	0	2	2	1	3	1	2	3	3	3	3	1	3	6	0	0	0	1	1	1	1	0	0	1	1	0	0	2	0	0	0	0	0	0	疫苗本身就有病毒的成分	2	2					0	1	0
55	1	0	1	0	1	0	1	1	1	2	1	2	3	4	3	3	4	3	4	1	1	1	1	1	1	1	1	0	0	0	1	0	3								2	2					1	0	1
56	2	1	0	1	0	0	1	1	2	2	1	2	3	3	2	2	3	6	6	1	1	1	1	0	1	1	0	0	1	1	1	0	1								1	3	0	1	0	0
57	1	1	1	1	1	0	2	2	2	3	2	1	2	2	3	3	3	3	4	1	1	1	1	1	1	1	1	1	1	1	1	0	1								2	2					0	1	0
58	1	1	0	1	1	0	2	2	2	3	2	1	2	3	4	5	2	2	5	1	0	0	0	1	1	1	0	0	1	1	0	0	1								1	3	0	1	0	0
59	1	0	0	1	1	0	2	1	2	1	1	2	4	3	2	4	1	3	3	1	1	1	0	1	1	1	1	1	1	1	0	0	1								2	2					1	1	0
60	1	1	0	1	1	0	2	2	2	4	1	1	2	2	3	3	2	2	3	1	1	1	1	1	1	1	1	1	1	1	1	0	1								2	3	1	1	1	0
61	2	1	1	1	1	0	2	4	2	3	2	2	3	2	3	2	3	3	3	1	0	0	1	0	1	1	1	0	1	1	1	0	2	0	1	0	0	0	0	0	1	2					1	0	0
62	1	1	1	1	1	0	2	2	2	4	2	2	2	3	3	5	5	5	4	1	0	1	1	1	1	1	0	0	1	1	0	0	1								3	1					1	1	1
63	1	1	0	1	1	0	2	2	2	3	2	2	1	2	2	3	2	1	6	1	0	0	0	1	1	1	0	0	1	1	0	0	3								2	4	0	1	1	0
64	1	1	0	1	1	0	2	2	2	4	2	1	3	2	2	4	4	3	3	1	0	1	1	1	1	1	0	0	1	1	0	0	1								2	2					0	1	1
65	1	0	1	1	0	0	1	1	2	3	2	1	4	4	3	1	6	1	3	1	1	0	1	0	0	0	1	1	1	0	1	0	3								1	2					0	1	0
66	1	1	0	1	0	0	1	1	2	3	2	1	1	1	1	1	1	3	4	1	1	1	1	1	1	1	1	1	1	1	1	0	1								3	3	1	0	0	0
67	1	1	1	1	1	0	2	2	2	3	2	2	2	4	6	5	4	2	2	0	0	0	1	1	1	1	0	0	1	1	0	0	2	0	0	0	0	0	0	过敏体质	2	4	0	0	1	0
68	1	1	0	1	1	0	4	4	2	3	2	2	2	2	2	2	2	2	3	1	1	1	1	1	1	1	0	0	1	1	1	0	1								2	2					1	0	0
69	2	0	0	1	1	0	2	1	2	3	2	1	2	2	2	3	3	2	2	1	1	0	1	1	1	1	0	0	1	1	0	0	1								2	2					1	1	0
70	1	1	1	1	1	0	2	3	2	4	2	2	2	2	2	3	4	3	6	1	1	1	1	1	1	1	1	1	1	1	0	0	1								4	2					1	1	0
71	3	1	0	1	1	0	3	3	2	3	1	2	3	3	3	5	2	3	6	1	1	0	1	1	1	1	1	0	1	1	0	0	1								1	1					1	1	1
72	1	1	0	1	1	0	2	2	2	3	2	2	2	2	2	2	4	2	6	1	1	1	1	1	1	1	0	0	1	1	0	0	1								1	4	1	1	1	0
73	1	1	0	1	1	0	2	1	1	4	2	2	3	3	3	2	2	2	4	1	0	0	1	1	1	1	0	0	1	1	0	0	1								3	2					1	0	1
74	2	1	0	0	1	0	1	2	1	4	2	2	6	1	1	2	2	2	6	1	0	1	1	0	1	1	1	0	1	1	0	0	1								2	4	1	0	0	0
75	1	1	0	0	1	0	4	2	2	3	2	2	1	1	2	4	2	2	1	0	0	0	1	1	1	1	0	0	1	1	0	0	1								1	2					1	0	1
76	2	1	0	1	1	0	2	2	2	3	2	1	2	3	3	3	3	2	2	1	1	1	1	1	1	1	1	1	1	1	0	0	1								2	3	0	1	1	0
77	1	1	0	0	1	0	2	1	1	3	2	1	2	2	4	3	3	2	6	1	1	0	1	1	1	1	1	0	1	1	0	0	1								3	1					1	0	0
78	1	1	1	1	1	0	2	2	2	3	2	2	2	2	6	3	4	4	4	0	1	0	1	1	1	1	0	0	1	1	0	0	2	0	1	0	1	0	0	0	2	2					1	1	0
79	1	1	0	1	1	0	3	1	2	3	2	3	2	2	2	2	2	2	1	1	1	0	1	1	1	1	1	0	1	1	0	0	1								2	3	0	1	1	0
80	1	0	0	1	0	0	2	2	2	3	2	2	2	3	2	2	3	2	1	1	1	0	1	0	1	1	0	0	1	0	1	0	1								1	3	0	1	0	0
81	2	0	0	1	1	0	4	4	1	3	2	2	2	2	2	3	3	3	2	0	1	0	1	0	0	1	0	1	1	1	0	0	1								3	2					0	1	0
82	1	1	1	0	0	0	2	3	2	2	2	1	3	3	4	3	3	4	4	1	1	1	1	1	1	1	1	1	1	1	1	0	1								2	2					1	1	0
83	2	0	1	0	0	0	1	2	2	3	1	2	5	3	5	3	3	5	4	1	1	0	0	0	1	1	1	1	1	1	0	0	1								3	4					0	1	0
84	1	0	0	1	1	0	3	2	2	3	2	2	3	2	3	3	2	2	3	1	0	0	1	0	1	1	1	0	1	1	0	0	1								3	2					1	0	0
85	1	1	0	1	0	0	1	4	1	4	1	2	6	1	2	6	2	3	4	1	0	1	1	1	0	1	0	0	1	1	0	0	1								2	3	1	1	0	0
86	1	1	0	1	1	0	1	1	2	3	2	1	3	3	4	4	2	2	5	1	1	1	1	1	1	1	1	1	1	1	1	0	3								2	2					1	0	1
87	1	1	1	1	1	0	1	1	2	3	2	1	5	4	4	4	4	4	2	1	1	1	1	1	1	1	1	1	1	1	0	0	1								2	3	1	1	0	0
88	2	1	0	1	1	0	2	2	2	3	2	1	2	2	2	2	3	2	4	1	1	0	1	1	1	1	0	0	1	1	0	0	1								2	2					0	1	1
89	2	1	0	0	0	0	2	3	2	2	2	3	5	6	6	6	5	4	6	0	1	0	1	1	1	1	1	0	1	1	0	0	1								3	3	1	0	0	0
90	1	1	1	1	1	0	1	1	2	2	2	1	4	3	3	2	3	4	2	0	1	1	1	1	1	0	1	0	1	0	1	0	1								2	2					1	0	0
91	1	1	0	1	1	0	2	1	2	4	2	2	4	2	2	2	2	2	4	1	1	1	1	1	1	1	1	0	1	1	0	0	1								2	2					1	0	1
92	3	1	0	1	0	0	4	2	2	3	2	2	2	1	2	2	1	3	5	0	0	0	1	1	0	1	1	1	0	1	1	0	1								4	2					0	0	1
93	1	1	0	1	1	0	2	3	2	3	2	2	1	3	2	3	5	4	3	1	0	0	1	1	1	1	0	0	1	1	1	0	1								3	2					0	1	0
94	1	1	0	0	0	0	3	1	2	2	2	2	2	2	3	3	3	3	5	1	1	1	1	1	1	1	1	1	1	1	0	0	1								3	2					0	1	0
95	1	1	1	0	1	0	1	2	1	2	2	3	6	4	6	6	3	2	6	1	0	1	0	1	1	1	1	0	1	1	0	0	1								5	3	0	1	1	0
96	1	1	0	0	1	0	2	1	2	3	2	1	2	2	2	1	3	2	6	0	1	1	1	1	1	1	0	0	1	1	0	0	3								2	4	1	1	1	0
97	2	0	0	1	0	0	4	2	2	2	2	2	2	2	2	4	5	2	2	1	0	0	0	1	1	1	0	1	1	1	1	0	1								3	3	1	0	0	0
98	2	1	1	1	1	0	2	2	2	3	1	2	4	3	3	3	4	3	5	1	1	1	1	1	1	1	1	1	1	1	1	0	1								3	2					1	1	0
99	1	0	0	1	1	0	1	4	2	3	2	1	2	2	2	2	3	3	3	1	0	0	1	1	1	1	0	0	1	1	0	0	1								3	2					1	0	0
100	3	1	0	0	1	0	2	2	2	4	1	1	2	1	1	1	3	3	6	1	1	1	0	1	1	1	0	0	1	1	0	0	1								2	4	0	1	1	0
101	2	0	0	0	1	0	4	2	2	1	2	2	5	3	2	4	4	5	4	0	1	0	0		0	0	0	0	0	0	0	0	1								3	1					0	1	0
102	1	1	1	1	1	0	3	2	1	3	1	2	1	5	3	1	5	3	2	0	0	0	0	1	0	1	0	0	1	0	0	0	2	0	1	0	0	0	0	0	3	4	0	1	0	0
103	2	1	0	1	0	0	1	2	1	1	3	2	5	5	3	2	2	1	5	1	1	1	0	0	0	1	0	0	1	0	0	0	1								2	4	0	0	1	0
104	1	1	0	1	1	0	2	2	2	3	2	1	5	5	5	4	4	4	5	1	1	0	1	1	1	1	0	1	1	1	0	0	1								2	1					1	0	1
105	1	1	1	1	1	0	1	2	2	3	2	1	3	3	2	3	3	3	5	0	0	0	0	0	1	1	0	0	0	0	0	0	3								2	2					0	1	1
106	2	1	0	1	0	0	4	4	1	2	2	2	2	2	3	3	3	3	2	1	1	0	0	1	1	1	0	0	1	1	0	0	1								2	2					0	1	0
107	1	1	1	1	1	0	1	1	2	3	1	3	3	4	4	5	2	2	4	0	1	1	1	1	1	1	1	0	1	1	0	0	1								1	3	1	1	1	0
108	1	1	0	1	1	0	2	2	2	3	2	2	1	1	1	6	6	6	6	0	1	0	0	0	0	1	0	0	1	1	0	0	1								2	2					0	1	1
109	1	1	0	1	1	0	1	1	1	2	2	1	2	2	2	3	2	2	2	1	0	1	1	1	1	1	1	0	1	1	0	0	1								2	3	1	1	1	0
110	1	1	0	1	1	0	4	4	2	4	1	2	2	1	2		5	5	6	1	1	0	0	1	0	1	0	0	1	0	0	0	1								2	4	1	0	0	0
111	2	1	0	1	1	0	2	2	2	3	1	2	6	2	3	5	5	4	4	0	1	0	1	1	1	1	1	0	1	1	0	0	1								2	2					1	1	1
112	2	1	0	1	1	0	1	1	2	3	2	2	6	2	2	1	2	3	6	1	1	1	1	1	1	1	0	0	1	1	0	0	2	1	0	1	0	0	0	0	4	3	1	0	1	0
113	1	1	1	1	1	0	1	1	1	2	1	2	3	2	2	2	2	2	2	1	1	1	1	1	1	1	1	1	1	1	0	0	1								1	2					1	1	1
114	1	1	0	1	1	0	2	2	2	4	2	2	2	2	2	3	3	1	5	1	1	0	1	1	1	1	1	0	1	1	1	0	1								2	3	0	0	1	0
115	1	0	0	1	1	0	2	2	2	3	2	2	2	3	3	4	4	3	5	1	1	0	1	1	1	1	0	0	1	1	0	0	1								1	3	0	1	0	0
116	1	0	0	1	1	0	2	3	2	3	2	3	3	6	4	3	1	2	4	1	1	1	1	1	1	1	1	1	1	1	1	0	1								1	2					1	0	0
117	1	1	1	1	1	0	2	2	2	4	2	2	6	6	6	6	6	6	6	1	1	1	1	1	1	1	1	1	1	1	1	0	1								2	2					1	1	1
118	1	1	0	1	1	0	2	1	2	3	2	2	2	1	3	6	4	3	2	0	0	1	1	1	0	1	0	0	1	1	0	0	1								2	1					1	0	1
119	1	0	0	1	1	0	2	2	2	2	2	1	6	2	3	2	2	6	1	1	0	0	1	1	1	1	0	0	1	1	0	0	1								1	3	0	0	1	0
120	1	1	0	1	1	0	2	1	2	4	2	2	2	4	2	1	3	2	6	0	0	0	1	0	0	1	0	0	1	1	0	0	2	0	0	0	1	0	1	0	5	2					1	1	1
121	2	1	0	1	1	0	2	2	1	4	2	2	1	1	1	3	2	4	3	1	1	0	1	1	1	1	1	1	1	1	1	0	1								2	3	1	1	1	0	0	0	0
122	1	0	0	1	1	0	2	2	2	3	2	2	5	2	3	3	3	3	5	1	1	1	1	1	1	1	0	0	1	1	0	0	1								2	2					0	1	0
123	1	0	0	1	1	0	1	1	2	4	2	2	1	3	1	2	2	2	2	1	1	1	1	1	1	1	1	1	1	1	1	0	1								3	3	1	1	1	0
124	1	1	0	1	1	0	2	1	2	3	2	2	2	3	2	2	3	1	3	1	1	1	1	1	1	1	1	1	1	1	1	0	1								1	2	1	1	1	0	0	1	0
125	1	1	0	0	0	0	2	2	2	1	2	1	5	4	5	4	5	4	2	1	1	1	1	1	1	1	1	1	1	1	1	0	1								1	2					1	1	0
126	1	0	1	0	0	0	2	1	1	2	2	2	2	2	2	5	3	3	6	0	1	0	1	1	1	1	0	1	1	1	0	0	1								1	2					1	0	0
127	1	1	0	1	1	0	2	3	2	3	1	1	3	3	4	2	3	2	1	1	1	0	1	1	1	1	0	0	1	1	0	0	1								2	2					0	1	1
128	1	0	0	1	1	0	1	1	2	3	2	2	2	2	3	2	2	2	1	0	1	1	1	1	1	1	1	1	1	1	1	0	1								1	3	0	1	0	0
129	2	1	0	1	1	0	2	2	2	3	2	1	3	3	3	3	2	2	4	1	0	1	1	1	1	1	0	0	1	1	0	0	1								2	2					1	1	1
130	3	1	0	0	1	0	2	1	1	2	1	2	2	2	3	3	2	4	4	1	1	1	1	1	1	1	0	0	1	1	0	0	1								2	3	0	1	0	0
131	3
132	1	1	0	0	0	0	1	1	2	1	2	1	5	5	5	5	5	5	1	1	1	1	1	1	1	1	1	1	1	1	1	0	1								1	1					1	1	1
133	1	1	0	1	1	0	2	3	2	3	2	1	5	5	4	5	5	5	3	1	1	1	1	1	1	1	1	1	1	1	1	0	1								1	2					1	0	0
134	1	1	0	1	1	0	4	4	1	2	1	2	2	2	2	2	2	2	6	1	0	0	1	1	1	1	0	0	1	1	1	0	3								2	3	0	1	1	0
135	2	1	0	1	1	0	4	1	1	4	1	3	3	6	3	3	2	1	5	1	1	0	1	1	1	1	0	1	1	1	0	0	2	0	0	1	0	0	0	0	3	2					1	1	1
136	1	0	0	1	1	0	2	2	2	3	1	1	2	2	2	1	2	3	5	1	1	0	1	1	1	1	1	0	1	1	0	0	1								1	3	1	0	0	0
137	2	1	1	1	1	0	1	1	2	1	2	2	3	3	3	4	3	3	2	1	1	1	1	1	1	1	1	0	1	1	0	0	1								3	2					0	1	0
138	2	1	1	1	1	0	2	4	1	2	2	3	2	2	2	3	3	2	6	1	1	1	1	1	1	1	1	1	1	1	1	0	1								3	3	1	1	1	0
139	1	1	0	1	1	0	2	2	2	3	2	2	1	2	3	5	4	4	3	1	1	1	1	1	1	1	1	1	1	1	1	0	1								2	2					1	1	1
140	1	0	0	1	1	0	1	2	1	3	2	2	2	2	2	2	2	2	5	1	1	0	1	1	1	1	0	0	1	1	0	0	2	0	1	0	0	0	0	0	3	4	0	1	1	0	0	0	0
141	1	1	1	0	0	0	2	2	2	3	2	2	1	2	3	4	3	3	2	1	1	1	1	1	1	1	1	1	1	1	1	0	1								1	3	1	1	1	0
142	1	1	0	1	1	0	2	2	2	3	2	2	2	2	2	1	4	3	2	1	1	0	1	1	1	1	0	0	0	1	0	0	1								3	3	1	1	0	0
143	2	1	0	0	1	0	4	3	2	1	2	2	1	1	1	1	1	1	2	1	0	0	1	1	0	1	0	0	0	0	0	0	1								1	2					0	0	1
144	1	1	0	1	0	0	1	1	2	3	2	1	2	2	3	2	3	2	4	1	1	1	1	1	1	1	1	0	1	0	1	0	1								1	2					0	1	0
145	2	0	0	1	1	0	2	2	1	2	2	2	2	2	2	3	3	3	2	1	1	1	1	1	1	1	0	0	1	1	0	0	1								1	3	0	0	1	0
146	2	1	0	1	1	0	2	1	1	4	1	3	2	2	3	2	3	2	6	1	1	0	1	1	1	1	0	0	1	1	0	0	1								2	2					1	1	0
147	1	1	0	1	1	0	2	2	2	3	2	1	3	4	3	2	4	2	5	1	1	1	1	1	1	1	1	1	1	1	0	0	1								2	2					1	1	1
148	1	0	0	1	0	0	3	3	2	3	2	2	2	2	2	2	4	4	3	1	1	1	1	1	1	1	1	1	1	1	1	0	1								2	2					1	1	0
149	1	1	1	1	1	0	2	1	2	3	2	1	2	2	2	3	1	1	4	1	1	1	1	1	1	1	1	0	1	1	0	0	1								2	3	0	1	1	0
150	2	1	1	1	1	0	3	1	2	3	2	2	1	1	6	3	6	2	6	0	1	0	0	0	0	1	0	0	1	1	0	0	1								5	5	0	0	0	1
151	2	1	0	1	1	0	2	2	1	3	2	2	3	1	3	3	1	1	3	1	0	1	1	1	0	1	0	1	1	1	0	0	2	0	0	1	0	0	0	0	2	2					1	1	1
152	1	1	0	1	1	0	2	2	2	3	2	2	2	2	2	3	4	4	3	1	0	0	0	1	1	1	1	0	1	1	1	0	1								2	2					1	1	1
153	1	1	0	1	1	0	2	1	1	4	2	2	3	3	3	2	2	2	4	1	0	0	1	1	1	1	0	0	1	1	0	0	1								3	2					1	0	1
154	1	1	0	1	1	0	2	2	2	3	2	2	2	2	2	3	3	2	2	0	0	0	0	1	1	1	0	0	1	1	0	0	1								2	3	0	1	1	0
155	1	1	0	1	1	0	2	1	2	2	2	2	3	3	3	5	5	5	5	1	1	1	1	1	1	1	1	1	1	1	1	0	1								2	1					1	1	1
156	1	1	0	1	1	0	2	2	2	3	2	1	3	3	4	3	2	2	6	1	1	0	1	1	0	1	0	0	1	1	1	0	1								1	2					1	0	0
157	2	1	0	1	0	0	1	1	2	2	2	1	5	5	4	5	5	4	2	1	1	1	1	1	1	1	1	1	1	1	1	0	1								1	4	1	1	0	0
158	1	1	0	1	1	0	1	1	2	2	2	2	2	2	2	2	3	2	3	1	1	0	1	1	1	1	0	0	1	1	0	0	1								2	3	1	1	1	0
159	2	1	0	1	1	0	2	1	2	3	2	2	2	2	3	4	2	4	3	0	0	0	1	1	1	1	0	0	1	1	0	0	3								2	3	1	1	1	0
160	2	1	0	0	1	0	2	2	1	4	1	2	1	1	6	4	4	3	3	1	1	1	1	1	1	1	0	0	1	1	0	0	1								3	2					1	0	1
161	1	1	0	1	1	0	2	1	2	3	2	1	2	2	2	2	1	2	6	0	1	1	1	1	1	1	0	0	1	1	0	0	2	1	0	1	1	0	0	0	2	3	1	1	1	0
162	1	1	0	0	1	0	2	1	1	2	2	2	2	2	2	2	3	2	3	1	1	1	1	1	1	1	1	0	1	1	0	0	1								4	2					1	1	0
163	1	1	0	1	1	0	1	1	2	3	2	1	2	2	2	4	4	4	2	1	1	1	1	1	1	1	1	1	1	1	1	0	1								1	2					1	0	0
164	2	1	0	1	1	0	2	4	1	4	1	3	2	2	2	3	3	2	6	0	0	0	1	1	1	1	0	0	1	1	0	0	3								3	1					1	1	1
165	1	1	0	1	1	0	1	3	2	3	2	1	5	4	4	2	5	1	4	1	1	1	1	1	1	1	0	0	1	1	1	0	2	1	0	0	1	0	0	0	1	2					1	0	1
166	2	1	1	0	0	0	2	4	1	2	2	1	2	2	2	3	2	2	6	1	1	1	1	1	1	1	1	1	1	1	1	0	1								2	3	1	1	1	0
167	1	1	0	1	1	0	2	3	2	2	2	2	2	2	3	3	4	4	3	1	1	1	1	1	1	1	0	1	1	1	1	0	1								1	1					1	1	0
168	1	1	0	1	1	0	1	1	2	3	2	2	1	1	2	2	3	3	3	1	1	1	1	1	1	1	1	1	1	1	1	0	1								2	3	0	1	1	0
169	1	1	0	1	1	0	2	3	2	3	2	1	5	5	5	5	5	5	3	1	1	1	1	0	1	1	1	1	1	1	1	0	1								1	2					1	0	0
170	1	1	0	1	1	0	2	1	1	3	1	2	3	2	6	1	2	3	3	0	0	0	1	1	1	1	0	1	1	1	0	0	3								2	3	0	0	1	0
171	1	1	0	1	1	0	2	3	2	3	1	2	3	3	3	4	2	2	4	1	0	0	1	0	1	1	0	0	1	1	0	0	1								3	2					1	1	0
172	3	0	0	1	1	0	4	4	1	2	1	2	3	1	2	6	2	3	4	1	0	1	1	0	0	1	1	0	1	1	0	0	1								2	3	1	0	1	0
173	1	1	0	1	1	0	2	2	1	3	1	2	4	3	2	5	2	4	2	1	0	1	1	0	0	1	0	1	1	1	0	0	1								2	3	0	1	0	0
174	1	1	0	1	1	0	4	2	1	4	2	3	2	2	3	1	1	1	6	1	0	0	1	1	1	1	0	0	1	1	0	0	1								3	2					1	1	0
175	1	1	0	1	1	0	2	1	2	2	2	2	2	2	2	3	3	3	2	1	1	1	1	0	1	1	0	0	1	1	0	0	1								1	3	1	1	1	0
176	2	1	0	1	1	0	2	1	1	3	2	2	3	2	2	3	3	2	2	0	1	0	1	1	0	1	0	0	1	1	0	0	1								2	1					0	0	1
177	1	0	0	1	1	0	2	2	2	3	2	3	5	3	2	5	5	5	5	1	1	1	1	1	1	1	1	1	1	1	1	0	1								3	2					1	1	1
178	3
179	1	1	1	1	1	0	3	1	2	3	2	2	2	2	2	1	3	3	3	1	1	1	1	1	1	1	1	0	1	1	0	0	1								2	2					1	0	0
180	2	1	0	1	1	0	1	2	2	3	2	2	1	1	2	3	3	4	3	1	1	1	1	1	1	1	1	0	1	1	1	0	1								2	1					1	1	0
181	2	1	1	1	1	0	2	2	2	3	2	2	2	3	3	2	3	3	3	1	1	1	1	1	1	1	1	1	1	1	1	0	1								1	4	1	1	1	0
182	2	0	0	1	1	0	2	4	1	3	1	2	3	3	2	6	2	3	4	1	0	1	1	1	0	1	1	0	1	1	0	0	1								2	3	1	0	1	0
183	1	0	0	1	1	0	1	1	2	3	2	2	2	3	2	2	2	2	3	1	1	0	1	1	1	1	1	1	1	1	0	0	1								2	2					1	0	0
184	1	1	0	1	1	0	2	2	2	3	2	2	2	2	2	4	2	1	5	1	1	0	1	1	1	1	1	1	1	1	0	0	1								1	3	1	1	1	0
185	2	1	0	1	1	0	2	4	2	3	1	2	2	2	4	5	1	2	6	0	0	0	0	1	0	1	0	0	1	0	0	0	3								4	4	0	0	1	0
186	1	0	0	1	1	0	2	2	1	3	2	2	2	2	2	4	2	2	3	1	1	0	0	1	1	1	0	0	1	1	0	0	1	0	1	1	0	0	0	0	3	3	1	1	1	0
187	1	1	0	1	1	0	2	1	2	4	2	1	6	6	6	4	2	2	5	1	1	0	1	1	1	1	0	1	1	1	0	0	1								2	1					1	0	1
188	3	0	0	0	0	0	4	4	2	不清楚	1	3	6	6	3	3	6	6	2	1	0	1	1	0	0	1	1	0	1	1	1	0	1								1	4	1	0	0	0
189	1	0	0	0	1	0	2	1	2	3	2	2	2	2	2	2	2	2	1	1	1	1	1	1	1	1	1	1	1	1	0	0	1								1	2					0	1	0
190	3	0	0	0	1	0	4	2	2	3	2	1	1	3	2	2	2	2	3	1	0	1	1	1	0	1	1	0	1	0	0	0	2	0	1	0	0	0	0	0	4	1					1	1	1
191	2	1	0	1	1	0	3	2	1	2	1	2	4	3	3	5	3	1	1	1	1	0	1	1	1	1	1	1	1	1	0	0	1								1	2					1	1	1
192	1	1	0	1	1	0	1	1	2	3	2	2	4	2	4	3	6	1	5	0	0	1	0	0	1	1	0	1	1	0	0	0	2	0	1	1	1	0	0	0	1	4	0	1	0	0
193	1	1	1	0	0	0	1	1	2	2	2	1	5	4	3	4	4	3	2	1	1	0	1	0	1	1	1	1	1	0	1	0	1								2	2					1	0	0
194	1	1	0	1	1	0	2	3	2	3	2	1	2	3	3	4	4	4	5	1	1	1	1	1	1	1	1	1	1	1	1	0	3								3	2					1	1	1
195	1	1	1	1	1	0	1	2	2	3	2	1	3	3	3	3	3	3	5	1	0	1	1	1	1	1	1	1	1	1	1	0	1								1	4	1	1	1	0
196	2	1	0	1	1	0	1	1	2	3	2	1	3	3	3	3	2	2	3	1	1	0	1	1	1	1	0	0	1	1	0	0	1								3	2					1	0	0
197	3	1	0	1	1	0	4	4	2	2	2	2	6	2	2	2	3	2	2	1	0	0	0	1	1	1	1	0	1	1	0	0	1								2	2					0	1	1
198	1	1	1	1	1	0	1	1	2	3	2	2	1	1	2	4	4	3	6	1	1	1	1	1	1	1	1	1	1	1	1	0	1								1	2					1	0	0
199	2	1	0	0	1	0	2	2	1	4	1	2	1	1	6	4	4	3	3	1	1	1	1	1	1	1	0	0	1	1	0	0	1								3	2					1	0	1
200	1	1	0	1	1	0	2	2	1	2	1	2	1	2	2	2	1	2	4	1	1	1	1	1	1	1	1	0	1	1	1	0	1								4	4	1	1	1	0
201	2	1	0	1	1	0	2	2	2	3	2	2	2	3	3	3	4	5	4	1	1	0	1	1	1	1	0	0	1	1	0	0	1								3	2					0	1	0
202	1	1	0	1	1	0	2	2	2	4	2	2	2	2	2	4	4	4	3	1	1	1	1	1	1	1	1	1	1	1	0	0	1								1	3	1	1	1	0
203	1	1	0	1	1	0	2	2	2	3	1	2	6	6	3	3	2	1	6	0	0	1	1	1	1	1	0	1	1	1	0	0	2	0	1	0	0	0	0	0	3	4	0	0	1	0
204	1	1	0	1	1	0	1	1	2	3	2	2	2	2	2	2	2	1	3	1	0	1	1	1	1	1	1	0	1	1	0	0	1								1	2					1	0	1
205	3	0	1	1	0	0	4	4	1	2	1	2	1	1	2	6	2	3	4	1	0	1	0	1	0	1	1	0	1	1	0	0	1								2	3	1	0	0	0
206	2	0	1	0	0	0	1	2	2	3	2	2	2	1	1	2	1	5	2	1	1	0	0	1	1	1	1	0	1	1	0	0	1								3	2					1	0	0
207	2	1	1	1	1	0	2	4	2	3	1	2	2	2	1	2	1	1	2	1	1	0	1	1	1	1	1	0	1	1	0	0	1								3	3	1	1	1	0
208	1	1	0	1	1	0	2	2	1	3	2	2	3	2	3	3	2	2	3	1	1	1	0	1	1	1	0	0	1	0	1	0	1								2	2					0	0	1
209	1	1	0	1	1	0	2	2	2	4	2	2	1	1	1	3	2	4	3	1	0	1	1	1	1	1	1	0	1	1	0	0	1								3	1					1	1	1
210	1	0	0	1	1	0	1	1	2	3	2	1	3	3	3	3	3	2	3	1	1	1	1	1	1	1	1	1	1	1	1	0	1								2	2					0	0	1
211	1	1	0	1	1	0	2	1	2	3	2	2	2	2	3	3	1	1	1	1	1	1	1	1	1	1	0	1	1	1	0	0	1								1	3	0	1	1	0
212	1	0	0	1	1	0	1	1	2	4	2	2	3	3	3	3	2	2	2	1	1	1	1	1	1	1	1	1	1	1	1	0	1								1	2					1	0	0
213	2	0	0	1	1	0	2	4	1	3	1	2	6	3	2	6	2	3	4	1	0	1	1	1	0	1	1	0	1	1	0	0	1								2	3	1	0	1	0
214	2	1	0	1	1	0	2	2	2	4	2	2	2	6	3	2	3	2	5	0	0	0	1	1	1	1	0	0	1	1	0	0	2	0	1	0	0	0	0	0	3	1					1	1	1
215	1	0	1	0	1	0	1	1	2	2	2	1	4	3	4	3	4	5	1	1	1	1	1	1	1	1	1	1	1	1	0	0	1								1	4	0	1	1	0
216	1	0	0	1	1	0	1	1	2	3	2	2	2	3	4	4	4	4	4	1	1	0	1	1	1	1	0	0	1	0	0	0	1								3	1					1	0	0
217	1	1	0	1	1	0	1	2	2	3	2	1	2	2	3	2	4	2	6	1	0	1	1	1	1	1	0	1	1	1	0	0	1								1	2					1	1	1
218	2	1	1	1	1	0	2	2	2	3	2	2	2	4	3	3	4	3	3	1	1	1	1	1	1	1	1	1	1	1	1	0	1								1	4	1	1	1	0
219	3	0	0	1	0	0	2	2	2	2	1	2	6	1	2	2	2	3	5	1	0	1	1	1	1	1	1	1	1	1	0	0	1								2	3					0	1	0
220	1	1	0	1	1	0	2	2	2	2	2	2	2	2	2	3	4	3	4	1	1	0	1	1	1	1	0	0	0	1	0	0	1								3	2					0	0	1
221	1	1	0	1	1	0	1	2	2	1	2	2	1	2	1	1	2	1	3	1	1	0	1	0	1	1	0	0	1	1	0	0	1								5	2					1	1	0
222	1	1	1	0	0	0	4	2	1	4	1	2	1	3	2	6	2	3	4	1	0	1	0	1	0	1	1	0	1	1	0	0	1								2	3	1	0	1	0
223	2	0	0	1	1	0	4	4	1	3	2	3	6	6	3	6	2	2	6	1	1	0	0	1	1	1	0	0	1	1	0	0	1								4	4	0	1	0	0
224	1	0	0	1	0	0	3	3	2	3	2	1	4	3	4	3	3	3	5	1	1	1	1	1	1	1	1	1	1	1	1	0	1								2	2					1	1	0
225	1	0	1	1	0	0	2	1	2	2	2	2	4	2	3	1	3	4	2	1	0	1	1	1	1	0	1	1	1	1	0	0	1								2	2					1	1	0
226	2	1	0	1	1	0	1	1	2	3	2	1	3	4	3	3	2	2	4	1	1	0	1	1	1	1	0	0	1	1	0	0	1								3	2					1	1	1
227	2	0	0	1	1	0	2	4	1	3	2	1	1	6	3	1	1	1	4	1	1	1	1	1	1	1	1	0	1	0	1	0	1								1	4	0	0	1	0
228	1	0	0	1	1	0	1	2	2	3	2	2	2	2	2	1	6	1	5	1	1	1	1	1	1	1	0	1	1	1	0	0	1								3	3	0	1	0	0
229	1	1	0	1	1	0	2	2	1	3	2	2	6	1	3	3	3	2	4	1	0	0	1	1	1	1	0	1	1	1	0	0	1								1	3	1	1	1	0
230	2	0	0	1	0	0	2	2	2	3	1	2	2	2	2	5	2	4	6	1	1	1	1	1	1	1	1	1	1	1	1	0	1								1	4	0	1	0	0
231	2	1	0	1	1	0	4	2	2	3	2	2	2	2	2	3	3	2	3	1	1	0	1	1	1	1	0	0	1	1	0	0	1								1	2					1	0	0
232	1	0	0	1	1	0	3	2	2	4	2	2	1	2	6	2	2	2	3	1	1	1	1	1	1	1	1	1	1	1	1	0	1								1	2					1	0	0
233	3	0	0	1	0	0	2	2	2	2	1	2	6	1	2	2	2	3	5	1	0	1	1	1	1	1	1	1	1	1	0	0	1								2	3					0	1	0
234	1	1	0	1	1	0	4	1	1	4	2	2	6	6	2	5	2	1	6	1	1	0	1	1	1	1	0	0	1	1	0	0	3								1	2					1	0	1
235	1	1	0	1	1	0	2	1	2	3	1	1	2	2	2	4	2	3	1	1	1	1	1	1	1	1	1	1	1	1	0	0	1								2	2					1	0	0
236	1	1	1	1	1	0	2	2	2	3	2	1	3	3	2	4	5	3	2	1	0	1	1	1	1	1	1	0	1	1	1	0	1								2	2					1	1	1
237	1	0	0	1	0	0	2	2	2	1	1	2	1	1	1	5	5	5	2	0	0	0	0	1	1	1	0	0	0	1	0	0	1								2	4	1	1	1	0
238	2	0	0	1	1	0	4	4	2	3	2	2	3	3	3	2	2	1	6	0	1	0	1	1	1	1	0	0	1	1	1	0	2	1	0	1	0	0	0	0	5	2					0	1	1
239	1	0	0	1	1	0	1	1	1	3	2	1	2	2	2	6	6	6	4	0	0	0	0	1	1	1	1	0	1	1	0	0	2	0	0	1	1	0	0	0	2	2					0	0	1
240	1	1	1	1	1	0	2	2	2	3	2	1	2	3	3	3	3	3	4	1	1	1	1	1	1	1	1	0	1	1	0	0	1								3	2					1	0	0
241	2	0	0	0	1	0	2	2	1	3	2	1	2	4	1	6	6	3	6	1	0	0	0	0	1	1	0	0	0	0	0	0	2	1	0	0	1	0	0	0	3	3	0	1	1	0
242	2	1	0	1	0	0	2	1	1	4	1	2	4	2	2	5	3	3	5	1	1	0	1	1	1	1	1	0	1	1	0	0	1								3	2					1	0	1
243	2	0	0	1	0	0	2	4	2	3	2	2	4	1	6	1	3	3	5	1	1	0	1	1	1	1	0	1	1	1	1	0	1								3	2					1	0	0
244	1	1	0	1	1	0	3	2	2	2	2	2	2	2	2	3	4	5	4	0	0	1	1	1	1	1	0	0	1	1	0	0	1								3	2					1	0	1
245	1	1	0	1	1	0	2	1	1	4	2	2	3	6	3	2	4	3	6	0	1	1	1	1	1	1	0	0	1	1	0	0	1								2	2					1	0	1
246	1	0	0	1	1	0	1	2	2	2	2	1	5	4	3	2	4	5	2	1	1	1	1	1	1	1	1	0	1	0	0	0	1								2	3	1	1	1	0	0	1	1
247	1	1	0	1	1	0	2	2	1	3	1	2	2	2	3	2	4	3	6	0	1	1	1	1	1	1	1	0	1	1	0	0	1								3	2					1	1	1
248	2	1	0	1	1	0	2	1	1	不清楚	2	2	3	2	2	3	3	2	2	0	1	0	1	1	0	1	0	0	1	1	0	0	1								2	1					0	0	1
249	1	0	0	0	1	0	4	1	1	2	1	3	5	1	6	6	6	6	6	1	1	1	1	0	0	0	0	0	0	0	0	0	3								5	1					0	0	1
250	2	0	0	1	0	0	2	2	2	2	2	2	6	6	6	6	6	6	6	1	1	1	1	1	1	1	1	1	1	1	1	0	3								1	4	0	1	1	0
251	1	0	0	1	1	0	4	2	1	3	2	2	3	2	3	3	3	3	4	1	1	1	1	1	1	0	0	0	1	1	0	0	3								2	2					0	0	1
252	2	0	0	1	1	0	1	2	2	4	2	1	3	5	3	1	1	1	4	0	1	0	0	1	0	1	0	0	1	1	0	0	1								3	4	0	0	0	1
253	1	0	0	1	1	0	2	2	1	3	1	3	2	2	2	2	3	3	2	1	1	1	1	1	1	1	1	1	1	1	1	0	3								2	2					1	0	0
254	1	0	0	1	1	0	2	1	2	3	2	1	2	3	2	2	2	2	4	1	0	0	1	1	1	1	0	0	1	1	0	0	1								2	3	1	0	0	0
255	1	0	1	0	0	0	4	4	1	2	2	3	2	2	2	6	6	6	6	1	1	1	1	1	1	1	1	1	1	1	1	0	3								3	2					1	1	1
256	1	1	0	1	1	0	1	1	2	3	1	1	2	2	2	1	1	1	4	1	0	0	1	1	1	1	1	1	1	1	0	0	1								2	2					1	0	0
257	1	1	0	1	1	0	2	3	2	3	2	2	2	2	2	2	2	2	4	1	1	1	1	1	1	1	1	1	1	1	1	0	1								3	2					1	1	1
258	1	1	0	1	1	0	2	1	2	3	2	2	4	3	3	4	2	4	5	1	0	0	1	0	1	1	1	0	1	0	0	0	1								2	2					1	1	0
259	1	1	0	0	1	0	2	2	2	3	2	1	1	1	3	3	4	5	3	1	1	1	1	1	1	1	1	1	1	1	0	0	1								2	1					1	1	0
260	1	1	0	1	1	0	2	4	2	3	2	1	3	3	3	5	4	3	6	1	1	1	1	1	1	1	1	1	1	1	1	0	1								2	1					1	1	1
261	1	1	0	1	1	0	4	4	2	3	2	2	2	2	2	2	1	1	4	1	0	0	1	1	1	1	0	0	1	1	1	0	2	0	0	1	0	0	1	0	2	3	0	1	0	0
262	1	1	0	1	1	0	2	2	2	3	1	1	1	2	2	3	4	1	5	0	0	1	0	1	1	1	1	1	1	1	1	0	1								1	4	1	1	1	0
263	1	1	0	1	1	0	2	2	2	2	2	1	1	2	2	2	3	3	3	1	0	0	1	1	1	1	0	0	1	1	0	0	1								2	3	1	1	0	0
264	1	1	0	0	0	0	2	4	1	3	2	2	2	3	3	2	3	1	1	1	0	1	1	1	1	1	0	0	0	1	0	0	2	1	1	0	1	0	0	6	3	2					0	1	0
265	1	1	1	1	1	0	2	3	2	3	2	1	2	2	5	3	2	2	5	1	1	1	1	1	1	1	1	1	1	1	1	0	1								1	2					1	0	0
266	1	1	0	1	1	0	2	2	1	4	2	2	3	3	3	3	4	4	5	1	1	0	1	1	1	1	0	0	1	1	0	0	1								3	2					1	1	1
267	2	1	0	1	1	0	2	1	1	3	2	3	2	2	4	2	2	2	6	1	1	1	1	1	1	1	1	1	1	1	1	0	1								3	1					1	1	0
268	1	1	0	1	1	0	2	1	2	3	2	1	2	2	2	2	2	1	2	1	1	0	1	1	1	1	1	0	1	1	0	0	1								2	2					1	0	0
269	2	1	0	1	1	0	2	3	1	2	1	2	3	3	3	2	2	2	5	1	1	0	0	1	0	0	0	0	1	1	0	0	1								2	2					1	1	1
270	1	1	1	1	0	0	1	1	2	1	2	1	5	4	3	4	3	4	2	1	1	1	1	1	1	1	1	1	1	1	1	0	1								1	1					1	1	0
271	1	1	0	1	1	0	2	2	2	3	2	1	5	4	4	5	3	2	2	1	0	1	1	1	1	1	1	1	1	0	1	0	1								1	2					0	1	1
272	2	1	0	0	1	0	4	3	2	1	2	2	1	1	1	1	1	1	2	1	0	0	1	1	0	1	0	0	0	0	0	0	1								1	2					0	0	1
273	1	1	1	1	1	0	2	2	2	3	2	2	4	3	4	5	5	5	5	1	1	1	1	1	1	1	1	1	1	1	1	0	1								2	1					1	1	1
274	1	0	0	1	1	0	1	1	2	4	2	2	2	2	2	3	3	3	5	1	1	0	1	1	1	1	0	0	1	1	0	0	1								3	2					1	0	1
275	2	1	0	1	0	0	1	2	1	2	1	2	3	2	2	3	3	4	4	1	0	1	1	1	1	1	1	0	1	1	0	0	1								3	3	0	1	1	0
276	1	0	0	1	1	0	3	2	2	3	2	2	3	3	3	5	5	5	4	1	1	1	1	1	1	1	1	1	1	1	1	0	2	1	0	0	1	0	0	0	2	1					1	1	1
277	1	0	1	1	1	0	2	2	2	3	2	1	2	2	3	3	3	3	6	1	1	1	1	1	1	1	1	1	1	1	0	0	1								3	2					1	1	1
278	1	1	0	1	1	0	4	4	2	4	1	2	2	1	2		5	5	6	1	1	0	0	1	0	1	0	0	1	0	0	0	1								2	4	1	0	0	0	0	0	1
279	1	1	0	1	1	0	2	2	2	3	1	2	3	2	4	4	3	3	5	1	0	0	1	1	1	1	1	0	1	0	0	0	3								3	3	1	1	0	0
280	1	0	0	1	0	0	2	2	1	3	1	1	6	3	3	5	5	1	5	0	1	0	0	0	1	1	0	0	0	0	0	0	1								1	2					0	1	0
281	1	1	0	1	1	0	1	1	2	1	2	2	1	1	1	1	1	1	2	1	1	1	1	1	1	1	0	1	1	1	1	0	1								2	2					1	0	0
282	1	1	0	1	1	0	2	2	2	3	2	1	2	2	2	2	3	3	5	1	1	0	1	1	1	1	1	1	1	1	0	0	3								3	1					1	0	0
283	1	0	0	1	1	0	1	1	2	3	2	1	5	4	4	5	5	4	2	1	1	1	1	1	1	1	1	1	1	1	0	0	1								1	3	0	1	0	0
284	2	1	0	1	1	0	2	2	2	4	2	2	2	6	3	2	3	2	5	0	0	0	1	1	1	1	0	0	1	1	0	0	2	0	1	0	0	0	0	0	3	1					1	1	1
285	2	1	0	1	1	0	2	2	1	3	1	2	2	2	3	4	3	2	4	1	0	0	1	1	1	1	1	0	1	1	1	0	1								4	1					1	1	0
286	1	0	0	1	1	0	2	2	2	2	2	1	2	2	3	4	4	4	2	1	1	0	1	1	0	1	0	1	1	0	1	0	1								2	2					0	1	0
287	1	1	0	0	0	0	1	3	2	2	1	1	2	2	2	2	2	2	2	1	1	1	1	1	1	1	1	1	1	1	1	0	1								2	2					1	0	0
288	1	1	0	1	1	0	1	1	2	3	2	2	2	2	2	3	3	3	3	1	1	1	1	1	1	1	1	1	1	1	1	0	1								2	3	0	1	1	0
289	3	0	1	1	1	0	4	4	1	4	1	2	1	1	3	1	3	1	2	0	0	1	1	1	1	1	1	0	1	1	1	0	1								2	2					0	1	1
290	1	1	0	1	1	0	2	2	2	2	2	1	2	2	2	3	2	2	1	1	0	0	0	0	1	1	0	0	1	1	0	0	1								5	4	0	1	0	0
291	1	1	0	1	1	0	4	4	2	3	2	2	2	1	3	2	2	2	5	1	1	0	1	1	1	1	0	0	0	1	0	0	1								2	3	1	1	0	0
292	2	1	0	1	0	0	2	4	2	2	1	2	2	6	6	6	2	4	5	1	0	1	1	1	1	1	0	0	1	1	0	0	1								3	2					0	1	0
293	1	1	0	1	1	0	1	4	2	2	2	3	1	6	3	6	3	1	6	1	0	1	0	1	1	1	1	0	1	1	0	0	1								4	1					0	1	0
294	1	1	0	0	1	0	2	1	1	4	2	2	3	4	2	4	3	3	5	1	1	1	1	1	1	1	0	0	1	1	0	0	1								3	3	1	0	1	0
295	2	0	0	1	1	0	1	1	2	2	2	2	1	1	6	6	6	4	6	0	1	1	1	1	0	0	1	0	1	1	0	0	1								2	3	0	1	0	0
296	1	0	0	1	1	0	2	3	2	3	2	2	2	2	3	3	1	2	5	1	1	0	0	1	1	1	1	1	1	1	1	0	1								2	3	0	1	1	0
297	2	0	0	0	1	0	2	2	2	3	2	2	2	1	2	1	3	1	1	1	0	1	1	1	1	1	0	0	1	1	1	0	1								3	1					0	0	1
298	1	1	0	1	1	0	3	2	2	3	2	1	3	3	3	4	3	3	5	1	1	1	1	1	1	1	0	1	1	1	1	0	1								2	1					1	0	0
299	2	1	0	1	1	0	2	2	2	3	1	1	4	4	3	4	2	2	6	0	0	1	1	1	1	1	0	0	1	1	0	0	1								3	2					1	0	1
300	3	0	0	1	0	0	1	4	2	3	2	2	2	2	6	3	3	3	3	1	1	1	1	1	1	1	1	0	1	1	1	0	1								1	2					0	0	1
301	2	1	0	1	1	0	2	1	2	3	2	2	6	6	5	5	5	4	1	1	1	0	1	1	1	1	0	0	1	1	0	0	1								2	2					0	0	1
302	1	1	0	1	1	0	2	1	2	4	2	1	2	2	2	2	2	1	5	0	0	0	0	0	0	1	0	0	0	0	0	0	1								1	2					0	1	1
303	1	1	0	1	1	0	3	1	2	3	2	2	1	2	2	2	3	3	3	1	1	1	1	1	1	1	0	0	1	1	0	0	1								2	3	1	1	1	0
304	1	0	0	1	1	0	2	2	2	4	2	2	2	2	2	2	2	2	1	1	1	1	1	1	1	1	1	1	1	1	1	0	1								2	4	1	1	1	0
305	1	1	0	1	1	0	2	1	2	3	1	2	1	2	3	4	3	3	6	0	0	0	0	0	1	1	0	0	1	1	0	0	3								3	4	1	1	1	0
306	3	1	0	1	1	0	2	2	1	不清楚	1	2	1	6	2	3	1	1	6	1	1	0	1	1	0	1	0	0	1	1	0	0	1								1	4	1	1	1	0
307	3	0	1	0	1	0	1	4	1	4	2	2	2	3	2	6	2	3	4	1	0	1	1	1	0	1	1	0	1	1	0	0	1								2	3	1	1	0	0
308	1	1	0	1	1	0	2	2	2	3	2	3	2	2	3	5	4	3	6	0	0	0	0	0	1	1	0	0	1	1	0	0	2	0	1	0	1	0	0	0	4	1					1	1	1
309	1	0	0	1	1	0	3	3	2	3	2	1	3	3	4	4	3	3	6	1	0	0	1	0	0	0	0	0	1	1	0	0	1								3	2					1	1	0
310	1	1	0	1	1	0	2	2	2	3	2	1	2	2	2	3	2	2	3	1	1	1	1	1	1	1	1	0	1	1	0	0	1								1	3	0	1	0	0
311	1	1	0	1	1	0	1	2	2	3	1	2	1	1	2	2	2	2	6	1	0	1	1	1	1	1	1	0	1	1	1	0	1								2	2					1	1	1
312	2	1	0	1	1	0	2	3	1	3	2	1	2	2	3	3	4	2	6	0	1	0	1	1	1	1	1	0	1	1	0	0	1								3	2	0	0	0	0	1	1	0
313	1	0	0	1	1	0	2	1	2	3	1	2	2	2	2	6	2	1	5	1	1	0	1	1	1	1	1	0	1	1	0	0	1								2	2					1	0	0
314	2	0	1	1	1	0	3	4	1	3	2	1	2	3	4	5	4	4	4	1	1	0	1	1	1	1	1	0	1	1	0	0	3								2	2					1	1	0
315	2	0	0	1	1	0	4	4	1	3	2	3	6	6	3	6	2	2	6	1	1	0	0	1	1	1	0	0	1	1	0	0	1								4	4	0	1	0	0
316	1	1	0	1	1	0	4	4	2	3	2	1	2	2	2	3	3	2	2	1	1	1	1	1	1	1	1	1	1	1	1	0	1								2	2					1	0	1
317	1	1	0	1	1	0	2	1	2	3	2	2	2	2	1	3	2	2	3	1	1	1	1	0	1	1	0	0	1	1	0	0	3								2	3	0	1	1	0
318	1	1	0	1	1	0	2	3	1	4	2	2	2	2	2	2	2	2	1	0	0	0	0	1	0	1	0	0	1	1	0	0	1								1	4	1	0	0	0
319	1	0	0	1	1	0	2	2	2	3	2	2	2	1	2	3	2	2	1	1	1	0	1	1	1	1	1	0	1	1	0	0	1								1	4	0	1	1	0
320	2	0	0	1	1	0	2	2	1	2	1	1	2	1	1	3	3	4	6	1	0	1	0	1	1	1	0	1	1	1	0	0	1								2	1					1	0	0
321	2	1	0	1	1	0	2	4	1	3	1	2	6	6	3	6	4	4	2	1	1	0	1	1	1	1	1	0	1	1	0	0	1								3	3	1	1	1	0
322	1	1	0	1	1	0	1	1	2	3	2	2	3	3	4	5	4	5	5	0	1	1	1	1	1	1	0	1	1	1	1	0	1								2	2					0	1	1
323	1	1	0	1	1	0	2	3	1	3	1	2	2	2	3	2	5	4	2	0	0	0	1	1	1	1	0	1	1	1	0	0	1								2	2					0	1	0
324	1	1	0	1	1	0	1	1	1	3	2	2	1	1	2	2	1	1	1	1	1	0	1	1	1	1	0	0	1	1	0	0	1								1	4	0	0	0	自己比较自觉，不会去
325	2	0	0	0	0	0	2	1	2	1	2	2	1	1	1	6	2	2	5	1	0	0	0	1	1	1	0	0	1	1	0	0	2	0	0	1	0	0	0	0	4	2					0	0	1
326	1	1	0	0	1	0	3	1	2	3	2	1	2	2	3	2	2	2	5	1	1	1	1	1	1	1	0	0	1	1	0	0	1								2	2					1	0	1
327	2	1	0	1	1	0	2	2	1	3	1	3	3	6	3	3	4	2	4	0	1	0	0	1	1	1	0	0	1	1	0	0	2	1	0	1	0	0	0	0	3	3	1	1	1	0
328	3	1	0	0	1	0	2	1	1	2	1	2	2	2	3	3	2	4	4	1	1	1	1	1	1	1	0	0	1	1	0	0	1								2	3	0	1	0	0
329	1	1	0	1	1	0	2	2	1	2	1	2	2	1	2	3	1	2	1	1	1	0	1	1	0	1	1	0	1	1	1	0	1								2	4	0	1	0	0
330	3	1	0	1	0	0	2	2	1	4	1	2	4	4	3	3	3	1	4	1	0	0	1	1	1	1	1	0	1	1	1	0	1								3	3	0	1	1	0
331	1	0	0	1	1	0	1	1	1	2	2	1	2	2	2	3	2	2	3	1	1	1	1	1	1	1	1	1	1	1	1	0	1								2	3	0	1	1	0
332	1	1	0	1	1	0	2	3	2	3	2	2	3	3	3	3	3	3	3	1	1	1	1	1	1	1	1	1	1	1	0	0	1								1	3	1	1	1	0
333	1	1	0	1	1	0	1	2	2	3	2	1	2	2	2	2	4	2	1	1	1	1	1	1	1	1	1	1	1	1	1	0	1								3	3	0	1	0	0
334	2	1	0	1	1	0	1	2	2	3	1	2	2	2	3	2	3	3	6	1	1	0	1	1	0	1	0	0	1	1	0	0	1								1	3	0	0	1	0
335	1	1	0	1	1	0	2	3	2	2	2	2	3	2	2	2	3	2	5	1	0	1	1	1	1	1	1	1	1	1	0	0	1								2	2					0	1	0
336	3	1	0	1	1	0	4	2	2	3	2	2	3	2	3	3	3	3	6	1	0	1	1	1	1	1	0	0	1	1	0	0	1								3	3	0	0	1	0
337	2	1	0	0	1	0	2	2	2	4	2	2	2	2	2	2	2	2	3	1	1	1	1	1	1	1	1	1	1	1	1	0	3								3	3	0	1	0	0
338	1	0	0	1	1	0	2	1	2	3	2	1	2	2	2	2	2	2	1	1	0	0	1	1	1	1	1	1	1	1	0	0	1								3	2					1	1	1
339	1	1	1	1	1	0	2	2	2	3	2	1	3	3	3	3	3	3	6	1	1	1	1	1	1	1	1	1	1	1	0	0	1								1	2					1	1	1
340	2	1	0	1	1	0	4	4	2	3	2	2	1	1	1	3	1	5	1	0	1	1	1	1	1	1	1	1	1	1	0	0	1								5	2					1	1	1
341	1	1	0	1	1	0	2	2	1	4	1	2	2	1	3	2	4	3	5	0	1	0	1	1	1	1	0	0	1	1	0	0	1								1	3	1	0	0	0
342	1	1	0	1	1	0	4	1	2	3	2	1	6	2	3	4	2	1	3	1	0	1	1	1	1	1	1	0	1	1	1	0	1								1	2					1	1	1
343	2	1	0	1	1	0	2	4	2	4	2	1	3	3	2	4	3	2	2	0	1	0	1	1	1	1	0	0	1	1	0	0	1								2	2					1	1	1
344	2	1	0	1	0	0	1	1	2	2	1	2	3	3	2	2	3	6	6	1	1	1	1	0	1	1	0	0	1	1	1	0	1								1	3	0	1	0	0
345	1	1	0	1	1	0	2	2	1	3	1	2	3	6	3	3	3	2	5	0	1	0	1	1	1	1	0	0	1	1	1	0	2	1	0	1	0	0	0	0	2	2					1	1	1
346	2	1	0	0	1	0	1	1	2	3	2	2	1	1	1	1	2	3	4	1	1	1	1	1	1	1	1	1	1	1	0	0	3								1	4	1	1	1	0
347	1	0	0	1	1	0	2	2	2	3	2	1	3	3	2	4	2	2	5	1	1	0	0	1	1	1	0	0	1	1	0	0	1								2	2					1	0	0
348	2	1	1	1	1	0	1	2	2	3	1	2	2	2	2	2	3	2	5	1	0	0	1	1	1	1	0	0	1	1	1	0	1								4	2					0	1	0
349	2	1	1	1	0	0	2	2	2	4	2	1	4	2	3	1	5	6	2	1	1	1	1	1	1	1	0	0	1	1	0	0	1								2	3	0	1	0	0
350	1	0	0	1	1	0	2	2	2	3	2	2	1	2	2	3	3	3	4	0	1	0	0	0	1	1	0	0	1	1	0	0	1								1	3	0	1	0	0
351	1	1	0	1	1	0	2	2	1	3	1	3	3	3	3	1	2	2	5	0	0	0	0	1	1	1	0	0	1	1	0	0	2	0	1	0	0	0	0	0	3	1					1	1	1
352	1	1	0	0	0	0	2	2	2	3	2	2	2	2	2	3	1	2	2	1	1	1	1	0	1	0	1	1	1	1	1	0	1								2	3	0	1	0	0
353	1	1	0	0	0	0	1	2	1	3	1	2	4	2	2	4	2	1	2	1	1	1	1	1	1	1	1	1	1	1	1	0	1								3	3	1	1	1
354	1	1	1	1	1	0	4	1	1	3	2	1	6	6	6	4	4	2	1	0	0	0	1	1	1	1	1	0	1	1	0	0	1								3	2					1	0	1
355	2	1	0	1	0	0	1	1	2	2	1	2	5	5	4	5	5	2	1	1	1	1	1	1	1	1	1	1	1	1	1	0	1								1	1					1	0	1
356	2	1	0	1	1	0	2	2	2	4	1	2	6	6	2	2	2	2	5	0	0	0	1	1	1	1	0	0	1	1	0	0	2	0	1	0	0	0	0	0	2	2					1	0	0
357	1	1	0	1	1	0	2	1	1	5	2	2	1	2	2	2	1	2	6	1	0	0	1	1	1	1	1	0	1	1	1	0	2	0	1	0	0	0	0	0	1	4	0	1	1	0
358	1	1	0	1	1	0	1	1	2	3	2	2	2	1	3	2	3	1	3	1	1	0	1	1	1	1	1	0	1	1	1	0	1								2	2					1	0	1
359	1	1	0	1	1	0	2	2	2	4	2	2	3	3	2	4	4	2	4	1	1	1	1	1	1	1	1	1	1	1	1	0	1								1	4	1	1	1	国家有能力防止发生
360	1	1	0	1	1	0	3	4	2	3	1	2	2	2	3	1	5	5	4	1	1	0	1	1	1	1	1	0	1	1	0	0	1								2	2					0	1	0
361	3	1	1	1	0	0	2	1	1	3	1	2	1	3	3	2	2	6	6	1	1	0	1	1	1	1	1	0	1	1	0	0	1								1	2					1	0	0
362	3	1	0	1	0	0	4	1	1	4	2	2	1	6	3	1	1	2	5	1	0	1	0	1	0	1	1	0	1	1	0	0	1								3	2					1	0	0
363	1	1	0	0	1	0	3	2	2	1	1	2	2	2	2	2	1	2	1	1	1	1	1	1	1	1	0	0	1	1	0	0	1								1	2					1	0	0
364	2	1	0	0	1	0	1	2	1	4	2	2	6	1	1	2	2	2	6	1	0	1	1	0	1	1	1	0	1	1	0	0	1								2	4	1	0	0	0
365	1	1	0	1	1	0	2	1	2	2	2	2	3	3	3	4	2	2	6	1	1	0	1	0	1	0	0	0	1	1	0	0	1								2	2					1	1	1
366	1	1	0	1	1	0	2	3	2	3	2	2	2	3	3	3	4	4	4	1	0	1	1	1	1	1	0	0	1	0	0	0	1								3	1					1	0	1
367	2	1	0	1	1	0	2	4	2	3	1	2	3	2	2	2	3	2	1	0	1	1	1	1	1	1	1	0	1	1	1	0	1								2	3	1	0	1	0
368	1	0	0	1	0	0	2	1	2	3	2	2	1	1	1	1	1	1	3	1	1	1	1	1	1	1	1	1	1	1	1	0	1								2	3	1	0	1	0
369	1	1	0	1	1	0	2	1	2	3	2	2	2	2	2	2	2	2	6	1	0	1	1	1	1	1	1	1	1	1	0	0	1								1	3	1	1	0	0
370	2	1	0	1	1	0	2	1	1	3	2	3	2	2	4	2	2	2	6	1	1	1	1	1	1	1	1	1	1	1	1	0	1								3	1					1	1	0
371	1	0	0	1	1	0	2	1	2	3	1	2	2	2	2	5	5	5	3	1	1	0	1	1	1	1	1	1	1	1	1	0	1								3	1					1	0	1
372	1	1	0	1	1	0	2	4	2	3	2	2	2	2	3	3	4	2	3	1	0	0	1	1	1	1	1	0	1	1	0	0	1								3	2					1	1	1
373	1	0	1	1	1	0	2	4	2	3	2	2	2	2	3	4	3	5	5	0	1	0	1	1	0	1	0	0	1	1	0	0	1								2	2					0	0	1
374	3	1	1	1	1	0	4	4	1	4	1	2	1	1	3	1	3	1	2	0	0	1	1	1	1	1	1	0	1	1	1	0	1								2	2					0	1	1
375	2	1	0	1	1	0	2	2	1	2	2	2	2	2	2	3	4	5	6	1	0	1	1	1	1	1	1	1	1	1	1	0	1								3	3	0	1	1	0
376	3	0	0	0	1	0	4	2	2	3	2	1	1	3	2	2	2	2	3	1	0	1	1	1	0	1	1	0	1	0	0	0	2	0	1	0	0	0	0	0	4	1					1	1	1
377	2	1	0	1	1	0	2	2	1	3	1	2	3	3	3	3	1	3	6	0	0	0	1	1	1	1	0	0	1	1	0	0	2	0	0	0	0	0	0	疫苗本身就有病毒的成分	2	2					0	1	1
378	1	1	1	1	1	0	3	3	2	3	2	2	2	2	2	2	3	4	4	1	0	0	0	1	1	1	0	0	1	1	0	0	1								2	3	0	1	1	0
379	1	1	1	1	1	0	1	1	2	3	2	2	2	3	2	3	2	3	2	1	1	1	1	1	1	1	1	1	1	1	1	0	1								2	2					0	1	0
380	2	1	0	1	0	0	2	2	2	3	2	2	2	2	3	2	2	1	4	1	0	0	1	1	1	1	1	0	1	1	1	0	1								1	2					1	0	1
381	1	1	1	1	1	0	2	1	1	3	1	1	2	2	3	3	2	2	5	1	0	0	1	0	1	1	0	1	0	1	1	0	1								4	4	1	1	1	0
382	2	0	0	0	1	0	1	2	1	2	3	5	1	6	6	1	6	1	6	1	1	1	1	1	1	1	0	0	0	0	0	0	2	0	0	0	0	0	0	1	1	3	0	0	1	0
383	1	1	0	1	0	0	2	3	2	3	2	2	2	2	6	1	3	3	3	1	0	1	1	1	0	1	0	0	1	1	0	0	2	1	0	1	0	0	1	0	4	1					1	0	1
384	2	1	0	1	1	0	2	2	2	3	2	2	2	2	6	2	2	2	4	1	1	0	1	1	1	1	1	1	1	1	1	0	1								2	3	0	1	1	0
385	2	0		1	1	0	1	1	1	5	1	2	2	2	2	3	5	2	4	1	1	0	1	1	1	1	1	0	1	1	0	0	1								1	3	0	0	1	0
386	1	1	0	1	1	0	3	2	2	3	2	2	1	2	2	3	3	2	2	0	0	0	0	1	1	1	0	0	1	1	0	0	2	0	1	0	0	0	1	0	2	3	0	1	1	0
387	1	1	0	0	1	0	2	2	2	2	2	2	4	1	3	3	5	5	3	1	0	0	0	1	0	1	0	0	1	0	0	0	1								3	1					0	1	0
388	1	1	0	1	1	0	2	2	1	3	1	2	2	3	3	4	4	4	5	1	1	1	1	1	1	1	1	1	1	1	1	0	1								2	1					1	1	1
389	2	1	1	1	1	人群密集处他	2	2	2	2	1	1	4	3	4	3	4	4	3	1	1	1	1	1	1	1	1	1	1	1	1	0	1								1	4	1	1	1	0
390	3	1	0	1	1	0	2	2	1	3	1	2	1	6	2	3	1	1	6	1	1	0	1	1	0	1	0	0	1	1	0	0	1								1	4	1	1	1	0	0	0	1
391	1	1	1	0	0	0	1	1	2	3	2	3	6	6	6	6	6	6	4	1	1	1	1	1	1	1	1	1	1	1	1	0	1								1	2					0	0	1
392	2	1	0	1	1	0	4	4	2	4	1	3	1	1	1	1	1	1	6	0	0	0	0	0	0	0	0	0	0	0	0	0	3								5	4	0	1	0	0
393	2	0	0	1	1	0	2	2	1	3	1	3	1	2	2	3	1	2	6	1	1	1	1	1	1	1	0	1	1	1	0	0	2	0	0	1	0	0	0	0	3	2					1	1	1
394	1	1	0	0	0	0	3	3	1	2	2	1	4	3	3	3	3	3	1	1	0	1	0	1	0	1	0	1	0	1	0	0	1								2	2					1	0	0
395	2	1	1	1	0	0	1	1	2	4	2	1	4	2	4	3	2	4	3	0	0	0	0	0	1	1	1	0	1	1	1	0	1								2	1					1	0	0
396	1	0	0	1	1	0	2	2	2	3	1	1	3	3	3	2	3	3	6	0	0	0	0	0	0	1	0	0	0	0	0	0	2	0	0	0	1	1	0	0	3	2					1	0	0
397	1	1	0	1	1	0	2	1	2	3	2	1	2	2	2	3	2	2	4	0	1	0	1	1	1	1	0	0	1	1	1	0	1								2	3	1	1	0	0
398	1	1	0	1	1	0	2	1	2	3	1	1	2	3	3	3	3	2	4	1	0	0	1	1	1	1	0	0	0	0	0	0	2	0	0	0	1	1	0	0	2	3	1	1	1	0
399	1	1	0	0	0	0	2	2	2	3	2	2	3	6	6	4	6	3	4	1	0	0	0	1	1	1	1	0	1	1	0	0	1								2	1					0	1	0
400	2	1	0	1	1	0	4	4	1	4	2	2	6	6	3	1	4	3	6	0	1	1	1	1	1	1	1	0	1	1	0	0	1								3	2					1	0	0
401	1	1	0	1	1	0	2	1	2	3	2	2	1	1	2	4	2	2	3	1	1	1	1	1	1	1	1	1	1	1	0	0	1								2	4	0	1	1	0
402	1	1	0	1	1	0	2	3	1	4	2	2	2	2	2	2	2	2	1	0	0	0	0	1	0	1	0	0	1	1	0	0	1								1	4	1	0	0	0	0	0
403	1	0	1	0	0	0	2	2	2	1	2	2	2	2	4	2	2	2	3	1	0	0	0	1	1	1	1	1	1	1	0	0	1								2	2					0	1	0
404	2	0	0	1	1	0	2	2	2	3	2	2	2	2	2	3	3	2	4	1	1	1	1	1	1	1	1	0	1	1	0	0	3								1	4	0	1	0	0
405	1	0	0	1	1	0	2	2	2	3	2	2	1	1	2	3	3	2	4	1	1	0	1	1	1	1	0	0	1	1	0	0	1								3	2					1	0	0
406	2	0	0	1	1	0	1	1	2	1	2	1	2	2	6	2	3	2	1	0	0	0	1	1	1	1	1	0	1	1	0	0	1								2	4					1	0	0
407	1	1	0	1	1	0	1	2	2	3	2	1	2	3	4	3	3	4	2	1	1	0	1	1	1	1	1	1	1	1	1	0	1								2	2					1	1	1
408	1	0	0	1	1	0	2	2	2	3	2	2	4	2	3	4	3	3	3	1	1	0	0	1	1	1	1	1	1	1	0	0	2	1	1	0	0	0	1	0	2	2					1	1	1
409	1	1	0	1	1	0	2	3	2	3	2	1	3	2	3	2	2	3	3	1	1	1	1	1	1	1	1	0	1	1	1	0	1								1	4	1	1	0	0
410	1	1	1	1	1	0	2	2	2	4	2	1	4	4	4	4	4	4	2	1	1	1	1	1	1	1	1	1	1	1	1	0	1								2	4	0	1	1	0
411	2	0	0	1	1	0	1	1	2	4	2	2	1	6	3	3	3	4	6	1	0	1	1	1	1	1	1	0	1	1	0	0	1								2	3	0	1	0	0
412	2	0	0	1	1	0	2	2	2	2	2	2	3	4	4	4	3	1	1	1	1	1	1	1	1	1	1	0	1	1	0	0	1								2	3	1	1	1	0
413	1	1	0	0	1	0	2	3	2	3	2	2	3	3	4	3	3	3	3	1	1	0	1	1	1	1	1	0	1	1	0	0	1								2	3	1	0	0	0
414	2	0	0	1	1	0	2	1	2	2	1	3	1	3	5	2	3	5	1	1	0	0	0	0	1	0	0	0	1	1	0	0	1								3	2					1	0	0
415	1	0	0	1	0	0	2	2	2	4	2	2	2	2	2	4	4	4	3	1	1	0	1	1	1	1	1	0	1	1	0	0	1								3	2					1	0	0
416	2	0	1	0	0	0	1	1	1	2	2	2	2	2	2	2	3	3	6	1	1	1	1	1	1	1	1	0	1	1	0	0	1								3	3	0	1	1	0
417	1	1	0	1	1	0	1	2	1	3	2	2	2	2	2	2	2	2	5	1	1	0	1	1	1	1	0	0	1	1	0	0	2	0	1	0	0	0	0	0	3	4	0	1	1	0	0	0	0
418	2	1	0	1	1	0	2	2	1	2	2	1	2	1	1	1	1	1	6	1	1	1	1	1	1	1	1	0	1	1	1	0	1								2	2					1	1	1
419	1	0	0	1	1	0	1	4	2	3	2	2	2	6	6	6	6	2	2	1	1	0	1	1	1	1	0	0	1	1	0	0	1								4	1					1	1	1
420	1	1	0	1	1	0	2	3	2	3	2	3	2	2	2	3	2	2	4	1	1	0	1	1	1	1	1	0	1	1	0	0	1								3	2					0	1	1
421	1	1	1	1	1	0	2	2	2	3	2	2	4	1	2	1	1	1	6	1	0	0	0	1	1	1	0	0	1	1	0	0	1								2	2					1	0	0
422	2	1	0	1	1	0	2	2	1	3	2	2	3	2	3	2	2	1	4	0	1	0	0	1	1	1	0	1	1	1	0	0	1								3	3	0	1	1	0
423	1	1	0	1	1	0	1	1	2	3	2	2	2	2	2	2	2	2	3	1	1	1	1	1	1	1	1	1	1	1	1	0	1								3	3	0	1	0	0
424	1	1	0	1	1	0	2	2	2	2	2	1	3	4	5	2	2	2	4	1	0	0	1	1	1	1	1	0	1	1	0	0	2	1	0	0	1	0	0	0	1	2					0	1	0
425	1	1	0	1	1	0	2	2	1	3	1	2	2	2	3	2	4	3	6	0	1	1	1	1	1	1	1	0	1	1	0	0	1								3	2					1	1	1
426	2	1	0	1	1	0	4	1	1	3	2	2	3	2	6	5	2	1	6	1	1	0	0	1	1	1	0	1	1	1	0	0	3								1	3	0	0	0	预防比较好
427	1	1	0	1	1	0	2	2	2	3	2	2	4	4	5	4	3	3	3	1	1	1	1	1	1	0	1	1	1	1	0	0	1								2	2					1	0	1
428	2	1	0	1	1	0	2	1	2	3	2	2	2	2	3	4	2	4	3	0	0	0	1	1	1	1	0	0	1	1	0	0	3								2	3	1	1	1	0
429	2	1	0	1	1	0	4	2	1	3	1	3	2	2	3	2	2	3	5	1	1	0	1	1	1	1	0	1	1	1	0	0	2	0	1	0	0	0	0	0	1	3	1	1	1	0
430	2	0	1	0	0	0	1	1	1	2	1	2	3	5	4	2	1	2	2	1	1	1	0	1	1	1	1	1	0	1	0	0	2	0	1	0	1	0	0	0	2	3	0	1	0	0
431	2	1	0	1	1	0	2	2	1	3	2	2	3	2	2	4	2	1	6	1	1	0	1	1	1	1	0	1	1	1	0	0	3								3	3	1	0	1	0
432	1	0	0	1	1	0	1	1	2	2	2	2	1	2	2	2	2	1	3	1	1	1	1	1	1	1	0	0	1	1	0	0	1								2	2					1	0	1
433	3	1	0	1	0	0	2	2	1	2	1	2	3	2	2	1	1	2	6	1	0	1	1	1	1	1	1	0	1	1	0	0	2	0	0	1	0	0	0	0	2	4	0	1	0	0
434	2	1	1	1	1	0	2	1	2	3	2	1	2	2	2	2	2	2	6	0	0	0	0	0	1	1	0	0	1	1	0	0	1								1	4	0	1	1	中国的情况并不严重，控制很及时
435	2	1	1	1	1	0	1	1	2	3	1	2	1	1	2	3	2	2	1	1	1	0	1	1	1	0	1	0	1	1	0	0	1								1	4	1	1	1	0
436	2	1	0	0	0	0	1	1	2	3	1	2	2	1	1	3	3	3	5	1	1	0	1	1	1	1	1	0	1	1	0	0	3								4	1					1	0	0
437	3	1	1	1	0	0	2	1	1	3	1	2	1	3	3	2	2	6	6	1	1	0	1	1	1	1	1	0	1	1	0	0	1								1	2					1	0	0
438	1	1	0	1	1	0	1	1	2	3	2	1	2	2	3	3	2	2	2	0	0	0	0	0	0	1	0	0	1	1	0	0	1								3	3	1	1	1	0
439	2	1	0	1	1	0	2	2	1	4	2	2	1	1	1	3	2	4	3	1	1	0	1	1	1	1	1	1	1	1	1	0	1								2	3	1	1	1	0
440	1	0	0	1	1	0	1	2	2	3	2	1	6	4	2	5	1	3	5	1	1	0	1	1	1	1	0	1	1	0	0	0	1								1	2					1	0	0
441	3	0	0	1	0	0	2	2	2	4	2	2	6	2	3	2	2	2	1	1	1	1	1	1	1	1	0	0	1	1	1	0	1								3	2					0	0	1
442	1	1	0	1	1	0	1	1	1	3	2	2	1	1	2	2	1	1	1	1	1	0	1	1	1	1	0	0	1	1	0	0	1								1	4	0	0	0	自己比较自觉，不会去
443	1	0	0	1	0	0	2	2	2	2	2	2	2	2	3	4	3	4	1	0	1	0	1	1	0	1	1	1	1	1	0	0	1								2	3	0	1	0	0
444	2		1	0	0	0	1	4	2	5	2	2	1	1	1	1	3	1	6	1	0	0	1	1	0	1	0	1	1	1	0	0	3								1	4	0	0	1	0
445	1	1	1	1	1	0	2	2	2	3	2	2	2	4	6	5	4	2	2	0	0	0	1	1	1	1	0	0	1	1	0	0	2	0	0	1	0	0	0	0	2	4	0	0	1	0	0	0	0
446	1	1	0	1	0	0	2	2	2	3	2	2	2	3	3	4	4	3	6	1	0	0	0	1	1	1	0	1	1	1	0	0	1								2	2					1	0	0
447	2	0	0	1	1	0	3	2	2	3	2	1	2	2	2	3	4	4	1	1	0	0	0	1	1	1	0	0	1	0	0	0	2	0	1	0	1	0	0	0	2	3	1	1	0	0
448	2	1	0	1	1	0	1	2	1	4	1	2	4	3	3	3	3	2	5	0	0	0	1	1	1	1	1	0	1	1	0	0	1								3	3	1	1	1	0
449	1	1	1	1	1	0	1	1	2	3	2	1	2	2	3	2	2	3	3	1	1	1	1	1	1	1	1	1	1	1	0	0	1								3	2					1	0	1
450	1	1	0	1	1	0	3	2	1	3	1	2	5	4	5	5	3	3	4	1	1	1	1	1	1	1	1	0	1	1	1	室内消毒	1								2	1					0	0	1
451	1	1	0	0	0	0	4	3	1	2	2	3	2	2	3	3	3	3	5	1	1	0	1	1	0	1	0	0	1	1	0	0	1								3	3	1	0	0	0
452	1	1	1	1	1	0	2	2	2	2	1	2	5	4	2	1	3	5	2	1	1	0	1	0	0	1	1	1	1	1	1	0	1								2	3	1	1	1	0
453	1	1	0	1	1	0	1	1	2	3	2	2	2	2	2	3	2	2	3	1	1	0	1	1	1	1	1	1	1	1	1	0	1								2	2					1	0	0
454	1	1	0	1	1	0	2	2	2	3	2	2	1	1	2	5	5	4	4	1	1	1	1	1	1	1	1	1	1	1	1	0	1								2	2					1	1	0
455	1	1	0	1	1	0	2	2	2	4	1	2	6	6	6	5	4	3	6	1	1	0	0	0	1	0	0	0	1	1	0	0	1								1	2					0	1	1
456	1	1	0	1	1	0	2	2	2	3	2	2	3	2	2	3	2	1	5	1	1	1	1	1	1	1	1	0	1	1	0	0	1								2	2					1	0	0
457	3	0	0	0	1	0	1	1	2	3	2	3	3	1	4	3	3	3	4	0	1	0	1	0	0	1	1	0	1	1	0	0	2	0	0	1	0	0	0	0	3	3	0	0	0	药的作用较好
458	1	1	0	0	1	0	2	1	1	2	2	2	2	2	2	2	3	2	3	1	1	1	1	1	1	1	1	0	1	1	0	0	1								4	2					1	1	0
459	1	0	0	1	1	0	3	2	2	2	2	1	2	3	4	2	2	2	4	1	0	0	1	1	1	1	1	0	1	1	0	0	2	0	0	0	1	1	1	0	2	2					1	1	1
460	2	1	0	1	1	0	2	2	1	3	1	3	3	6	3	3	4	2	4	0	1	0	0	1	1	1	0	0	1	1	0	0	2	1	0	1	0	0	0	0	3	3	1	1	1	0
461	2	1	0	0	1	0	4	2	2	2	2	2	2	2	2	2	2	2	3	1	0	1	1	1	1	1	0	0	1	1	1	0	1								1	4	0	0	1	0
462	1	0	0	1	1	0	1	1	2	3	2	1	2	2	3	2	1	1	2	1	0	1	1	1	1	1	1	0	1	1	1	0	1								3	2					1	0	1
463	2	1	0	1	1	0	3	3	2	3	2	2	1	2	4	1	5	5	6	1	0	0	1	0	1	1	0	1	1	1	1	0	1								3	3	0	1	1	0
464	1	1	1	1	1	0	1	1	2	3	2	1	2	2	2	3	2	3	1	1	0	0	1	1	1	1	0	0	1	0	0	0	3								2	4	1	1	1	0
465	2	1	1	1	1	人群密集处	2	2	1	3	2	2	2	3	2	3	3	3	3	1	1	1	1	1	1	1	1	1	1	1	1	0	1								1	4	1	1	1	0
466	1	1	0	1	1	0	2	1	2	3	2	2	1	1	1	5	1	1	1	1	0	0	1	1	1	1	0	0	1	1	0	0	2	1	0	0	1	0	1	0	1	1					1	0	0
467	1	1	0	1	1	0	2	2	2	3	1	2	1	1	6	3	2	1	3	0	1	0	1	1	1	1	1	0	1	1	0	0	1								1	2					1	1	1
468	1	1	0	1	1	0	2	1	2	3	2	1	2	3	3	4	4	3	4	1	1	0	1	1	1	1	0	1	1	1	0	0	1								2	1					0	1	0
469	1	0	1	0	0	0	4	4	1	2	1	3	4	4	4	4	5	2	4	1	1	1	1	1	1	1	1	0	1	1	0	0	2	0	1	0	0	0	0	0	3	1					0	1	0
470	1	1	0	1	1	0	3	1	2	3	2	2	2	2	2	2	2	3	5	1	0	0	1	1	1	1	1	0	1	1	0	0	1								2	2					1	1	0
471	1	1	0	1	1	0	2	2	2	3	2	2	2	2	2	2	2	2	6	1	0	0	1	1	1	1	0	0	1	1	0	0	2	0	0	1	1	0	0	0	3	5
472	1	1	1	1	1	0	2	2	2	4	2	1	3	3	3	4	2	2	4	1	1	0	1	1	1	1	0	0	1	1	0	0	1								2	2					1	1	1
473	2	1	0	0	0	0	2	2	1	2	2	2	1	1	1	1	1	1	3	1	1	1	1	1	1	1	1	1	1	1	1	0	1								1	1					0	1	0
474	2	1	1	1	1	0	2	1	1	3	1	2	1	2	6	1	2	2	6	1	0	0	0	1	1	1	1	0	1	1	1	0	2	0	0	1	0	0	0	0	4	4	0	1	1	0
475	1	1	0	1	1	0	2	2	2	4	2	2	5	3	5	5	5	4	4	1	1	0	1	1	1	1	0	0	1	1	0	0	1								3	1					1	1	1
476	1	0	0	1	1	0	2	2	2	3	2	1	1	2	2	3	4	4	3	1	0	0	1	1	1	1	1	1	1	1	1	0	1								1	4	0	0	1	0
477	1	0	0	1	1	0	2	2	2	3	2	2	1	1	1	2	4	3	2	1	1	1	1	1	1	1	1	1	1	1	1	0	3								2	3	1	1	0	0
478	2	1	0	1	0	0	2	1	1	4	1	2	4	2	2	5	3	3	5	1	1	0	1	1	1	1	1	0	1	1	0	0	1								3	2					1	0	1
479	1	1	1	1	1	0	1	1	2	3	2	3	5	4	3	2	1	6	1	1	0	1	0	1	0	1	0	1	0	1	0	0	1								1	1					1	0	0
480	1	0	0	1	1	0	2	2	1	2	1	2	2	2	3	2	2	4	3	1	1	0	1	0	0	1	0	0	0	1	0	0	1								3	2					1	1	0
481	1	1	0	1	1	0	2	1	1	2	2	3	2	2	2	4	1	1	3	0	1	0	1	1	1	1	0	0	1	1	0	0	1								3	3	0	1	1	0
482	1	1	0	1	1	0	2	2	2	3	2	1	2	2	4	1	3	1	5	0	0	0	1	1	1	1	0	0	1	1	0	0	1								1	4	1	0	0	0
483	2	1	1	1	0	0	2	2	2	2	2	1	3	5	4	3	6	1	2	1	1	1	1	1	1	1	0	0	1	1	0	0	1								2	3	0	1	0	0
484	1	0	1	1	0	0	2	1	2	3	2	2	2	2	2	4	3	3	3	0	0	0	1	1	0	1	0	1	1	0	0	0	1								2	2					0	1	0
485	2	0	0	1	1	0	2	2	1	2	1	1	2	1	1	3	3	4	6	1	0	1	0	1	1	1	0	1	1	1	0	0	1								2	1					1	0	0
486	1	1	0	1	1	0	2	4	1	2	2	1	2	2	2	2	2	2	6	1	0	1	1	1	1	1	1	1	1	1	0	0	3								1	3	0	1	1	0
487	1	1	0	1	1	0	2	1	2	3	2	1	3	3	3	5	5	5	6	1	1	1	1	1	1	1	1	1	1	1	1	0	1								5	1					1	1	1
488	2	1	1	1	1	0	4	2	2	1	2	2	2	2	3	3	4	3	2	1	0	1	1	1	1	1	1	1	1	1	1	0	1								2	1					0	1	1
489	1	1	0	1	1	0	2	2	2	4	2	2	2	2	2	2	4	3	4	1	1	0	1	1	1	1	1	1	1	1	1	0	1								3	1					1	1	1
490	1	1	1	1	1	0	2	2	2	3	2	1	1	1	3	5	4	5	2	1	1	1	1	1	1	1	1	1	1	1	1	0	1								2	2					1	1	1
491	3	1	0	1	0	0	2	2	1	2	1	2	3	2	2	1	1	2	6	1	0	1	1	1	1	1	1	0	1	1	0	0	2	0	0	1	0	0	0	0	2	4	0	1	0	0
492	2	0	0	1	1	0	4	4	2	3	2	3	4	3	4	3	4	4	1	1	1	0	0	0	1	1	1	1	1	1	0	0	1								2	2					0	1	0
493	1	1	0	1	1	0	2	3	2	3	2	2	2	2	3	1	1	1	3	1	1	1	1	1	1	1	0	0	1	1	0	0	2	0	1	0	0	1	0	0	1	4	0	1	1	0
494	1	0	0	1	1	0	2	2	2	4	1	1	4	3	3	1	1	3	6	1	0	1	1	1	1	1	1	0	1	1	0	0	1								2	1					1	0	1
495	2	0	0	1	1	0	2	2	2	3	2	3	3	3	2	3	2	2	4	1	0	1	1	1	1	1	0	0	1	1	0	0	2	0	0	1	0	0	0	0	2	2					1	1	1
496	1	0	1	1	0	0	2	3	2	4	2	2	1	1	1	1	1	1	2	1	0	0	1	1	1	1	1	1	1	1	1	0	1								1	2					0	1	1
497	1	1	0	1	1	0	3	2	2	3	2	3	2	2	3	3	4	3	5	1	1	1	1	1	1	1	0	1	1	1	0	0	1								4	1					1	1	1
498	1	1	1	1	1	0	2	2	2	3	2	2	5	5	5	6	6	3	3	1	1	0	1	1	1	1	1	0	1	1	0	0	1								1	2					0	1	0
499	1	1	1	1	1	0	2	2	2	3	2	2	1	2	2	3	2	2	6	1	1	0	1	1	1	1	0	0	1	1	0	0	1								2	2					1	1	1
500	1	0	1	1	1	0	2	2	1	2	1	2	2	2	6	4	3	4	3	1	1	0	1	1	1	1	0	0	1	1	0	0	1								3	2					0	1	0
501	1	1	0	0	1	0	2	2	2	3	2	2	2	2	2	3	4	4	3	0	0	0	1	1	1	1	0	0	1	1	0	0	1								2	2					1	0	0
502	1	1	1	1	1	0	1	1	1	3	1	2	1	1	2	1	1	1	2	1	0	1	1	1	1	1	1	1	1	1	1	0	2	0	1	1	1	0	0	0	1	1	0	0	0	0	1	1	1
503	1	1	0	1	1	0	2	1	2	3	2	1	2	2	3	3	3	2	3	1	0	0	1	1	1	1	0	0	1	1	0	0	1								2	3	1	1	1	0
504	1	0	0	1	0	0	3	1	2	2	2	2	4	4	2	3	2	3	2	0	1	0	1	1	0	1	0	1	0	1	1	0	3								2	2					0	1	0
505	3	1	0	1	0	0	2	2	1	4	1	2	4	4	3	3	3	1	4	1	0	0	1	1	1	1	1	0	1	1	1	0	1								3	3	0	1	1	0
506	2	1	0	1	0	0	1	2	1	2	1	2	3	2	2	3	3	4	4	1	0	1	1	1	1	1	1	0	1	1	0	0	1								3	3	0	1	1	0
507	2	1	0	0	0	0	3	3	2	3	1	2	2	2	6	3	4	3	5	0	1	0	0	1	0	1	0	0	1	0	0	0	1								2	3	1	0	0	0
508	1	1	0	1	1	0	1	4	2	4	2	1	2	2	3	2	2	2	2	1	0	0	0	1	1	1	0	0	1	1	0	0	1								2	3	0	1	0	0
[truncated: 29 more columns]
